# Supplementary material for: Linker driven site-specific catalysis in atomically precise silver cluster assemblies
Source: Royal Society of Chemistry journal article supplement (doi:10.1039/d4sc08408j), 2025-01-01
Supplement: d4sc08408j1.pdf [file d4sc08408j1.pdf]

## Supporting Information

# Linker Driven Site-specific Catalysis in Atomically Precise Silver Cluster-Assemblies

Priyanka Chandrashekar,<sup>[a]</sup> Arun Karmakar,<sup>[b]</sup> Ravari Kandy Aparna,<sup>[a]</sup> Laddi Singh<sup>[c]</sup>, Pradip Kumar Mondal,<sup>[d]</sup> Subrata Kundu,<sup>[b]\*</sup> Kalishankar Bhattacharyya,<sup>[c]\*</sup> Sukhendu Mandal <sup>[a]\*</sup>

[a] School of Chemistry, Indian Institute of Science Education and Research Thiruvananthapuram, Kerala, India-69555. E-mail: [sukhendu@iisertvm.ac.in](mailto:sukhendu@iisertvm.ac.in)

[b] Electrochemical Process Engineering (EPE) Division, CSIR-Central Electrochemical Research Institute (CECRI), Karaikudi, Tamil Nadu, India- 630006. Email: [kundu.subrata@gmail.com](mailto:kundu.subrata@gmail.com)

[c] Department of Chemistry, IIT Guwahati, Assam, India-781039. Email: [ksb@iitg.ac.in](mailto:ksb@iitg.ac.in)

[d] Elettra-Sincrotrone Trieste, S.S. 14 Km 163.5 in Area Science Park, Basovizza, Trieste, Italy-34149.

## Contents

| <b>Section</b> | <b>Description</b>                                                                                                                                                   | <b>Page No.</b> |
|----------------|----------------------------------------------------------------------------------------------------------------------------------------------------------------------|-----------------|
| 1              | Experimental section                                                                                                                                                 | S3-S5           |
| 2              | Crystallographic details                                                                                                                                             | S6-S10          |
| 3              | Optical microscopic image                                                                                                                                            | S11             |
| 4              | Crystal structures of Ag <sub>12</sub> -pyz, Ag <sub>12</sub> -bpy, Ag <sub>12</sub> -bpa, Ag <sub>12</sub> -azopy, and Ag <sub>12</sub> -py                         | S12-S19         |
| 5              | Characterization of Ag <sub>12</sub> -pyz, Ag <sub>12</sub> -bpy, Ag <sub>12</sub> -bpa, Ag <sub>12</sub> -azopy, and Ag <sub>12</sub> -py (PXRD, SEM-EDS, XPS, TGA) | S20-S29         |
| 6              | Water stability of Ag <sub>12</sub> -pyz                                                                                                                             | S30             |
| 7              | Post catalytic studies (PXRD, SEM-EDS, XPS)                                                                                                                          | S31-S32         |
| 8              | TD-DFT of cluster model                                                                                                                                              | S33-S38         |
| 9              | <i>I-V</i> characteristics of Ag <sub>12</sub> -Pyz                                                                                                                  | S39             |
| 10             | Comparison table of other catalysts reported in the literature                                                                                                       | S40-S41         |
| 11             | References                                                                                                                                                           | S42             |
| 12             | Optimized coordinates                                                                                                                                                | S43-S112        |

## 1. Experimental Section

### Materials

Silver nitrate ( $\text{AgNO}_3$ ), cyclohexane thiol (HSCy), silver trifluoroacetate ( $\text{AgCF}_3\text{COO}$ ) (98%), pyrazine (99%), 4,4'-Bipyridine (98%), 1,2-Bis(4-pyridyl)ethane (99%), 4,4'-Azopyridine, trifluoroacetic acid ( $\text{CF}_3\text{COOH}$ ) were purchased from Sigma-Aldrich. The HPLC-grade solvents dimethylformamide (DMF), acetonitrile ( $\text{CH}_3\text{CN}$ ), chloroform ( $\text{CH}_2\text{Cl}_2$ ), pyridine, and triethyl amine ( $\text{Et}_3\text{N}$ ) were purchased from Spectrochem Pvt. Ltd. All the chemicals and solvents procured were utilized without further purification.

### Methods

Optical microscope images were captured on a Leica microscope with an MC170 HD camera. Powder XRD for the crystal samples were recorded on a Bruker D8 Advance X-ray diffractometer ( $2\theta$  from  $5^\circ$  to  $50^\circ$ ) with  $\text{Cu-K}\alpha$  X-ray source ( $\lambda = 1.5418 \text{ \AA}$ ). The temperature dependent PXRD was done using PANalytical ( $\text{Cu K}\alpha$  radiation,  $\lambda_{\text{avg}} \approx 1.54060 \text{ \AA}$ ) diffractometer, the material was mounted on a glass slide, except for  $\text{Ag}_{12}$ -azopy which was done using Bruker D8. The samples were subjected to a temperature ramp from room temperature (RT) to the target temperature over a duration of 3 hours, followed by heating at the target temperature for 2 hours. Subsequently, the samples were allowed to cool down over a period of 3 hours. Scanning electron microscopic (SEM) images and Energy Dispersive X-ray Spectra (EDS) were obtained using Nova NANOSEM 450 scanning electron microscope for surface morphology and elemental analysis, respectively. The crystals were handpicked and mounted on a carbon tape for the analysis. X-ray photoelectron spectroscopy (XPS) measurements were performed using the Omicron Nanotech instrument with a  $\text{Mg K}\alpha$  X-ray source, and casaXPS software was used for data deconvolution. The carbon correction with respect to 284.8 eV was done before plotting. Thermogravimetric analysis were done using an SDT Q600 analyzer by Shimadzu. The samples were heated at a rate of  $10^\circ\text{C}/\text{min}$  up to  $500^\circ\text{C}$  under a constant flow of nitrogen ( $\text{N}_2$ ).

### Single-Crystal X-ray Diffraction:

**$\text{Ag}_{12}$ -pyz:** The Bruker D8 Quest - Microfocus SCXRD (single crystal X-ray diffractometer) with Bruker PHOTON III C14, CPAD detector was used to collect the single crystal data.  $\text{MoK}\alpha$  ( $\lambda = 0.71073 \text{ \AA}$ ) was the radiation source for the experiment. The frames were integrated with the Bruker SAINTS software package using a narrow-frame algorithm. The crystal structure was solved and refined by SHELXTL software package.<sup>1,2,3,4</sup>

A solvent mask was calculated and 298 electrons were found in a volume of  $1048 \text{ \AA}^3$  in one void per unit cell. This is consistent with  $7.5[\text{H}_2\text{O}]$  per formula unit, which accounts for 75 electrons per unit cell.

### **$\text{Ag}_{12}$ -bpy, $\text{Ag}_{12}$ -bpa, $\text{Ag}_{12}$ -azopy:**

Data collection was conducted at the X-ray diffraction beamline (XRD1) of the Elettra Synchrotron (Trieste, Italy).<sup>5</sup> The crystals were immersed in NHV oil (Jena Bioscience, Jena, Germany) and mounted on the goniometer head using nylon loops (MiTeGen, Ithaca, USA). Complete datasets were obtained at 100 K using a nitrogen stream supplied by an Oxford Cryostream 700. Data acquisition employed a monochromatic wavelength of 0.70 Å, utilizing the rotating crystal method on a Pilatus 2M hybrid-pixel area detector (DECTRIS Ltd., Baden-Daettwil, Switzerland). The diffraction data were indexed and integrated with XDS.<sup>6</sup> The structure was solved with the SHELXT<sup>7</sup> structure solution program using Intrinsic Phasing and refined using the SHELXL<sup>8</sup> refinement package through Least Squares minimization, all within the Olex2 software environment.<sup>9</sup> PLATON SQUEEZE<sup>10</sup> was applied during the final refinements to remove density mess from randomly oriented solvent molecules. All non-hydrogen atoms were refined anisotropically and hydrogen atoms were (positioned geometrically) refined isotropically using an olex2.<sup>9</sup>

### **Density functional theory (DFT) calculations:**

All DFT calculations of the studied cluster model were carried out in the Gaussian 16 package.<sup>11</sup> The PBE exchange-correlation (XC) functional was applied under the generalized gradient approximation (GGA).<sup>12</sup> A standard 6-31G(d) basis set was employed for C, N, O, F, S, and H, while the effective core potential SDD basis set was used for Ag.<sup>13</sup> The atom positions in all systems underwent complete optimization without constraints, and subsequently, frequency calculations were conducted to confirm the absence of imaginary frequencies.

### **Electrochemical Studies:**

All the electrochemical experiments were conducted using the electrochemical analyzer AURT-M204. Three electrode systems with graphite rods, saturated calomel electrode (SCE), and the catalyst coated on carbon cloth were used for all the electrocatalytic experiments. 0.5 M H<sub>2</sub>SO<sub>4</sub> prepared with DI water was used as the electrolyte. 3 mg of catalyst, 750 μL of DI water, 200 μL of ethanol, and 50 μL of Nafion binder solution were mixed for the preparation of catalyst ink, which was then drop-casted on carbon cloth (Catalyst loading = 0.1045 mg). LSV polarization analysis was done at a scan rate of 5 mV s<sup>-1</sup> and all the polarization curves were 100 % iR corrected. EIS studies were done in the frequency window of 0.1 Hz to 100 Hz with an applied potential of 350 mV. Inductively coupled plasma-mass spectrometry (ICP-MS) data were collected using iCAP RQ instrument from ThermoScientific.

## Synthesis:

**Synthesis of Ag<sub>12</sub>-py cluster:** The synthesis procedure is similar to the earlier reported NC-1 from our group.<sup>14</sup>

To the solution containing 0.1 mmol of the (Ag-SCy)<sub>n</sub> complex in 4 mL CH<sub>3</sub>CN, 0.2 mmol of AgCF<sub>3</sub>COO was added and sonicated until fully soluble. Subsequent dropwise addition of 0.6 mmol of pyridine in 2 mL CHCl<sub>3</sub> to the previous mixture. The resulting solution was allowed to slowly evaporate under ambient conditions, yielding bulk transparent block-shaped crystals after a 4-day. These crystals were then washed with CHCl<sub>3</sub> and vacuum-dried and used in subsequent experiments. Yield = 37 % based on Ag.

**Synthesis of Ag<sub>12</sub>-pyz CAM:** 0.06 mmol of (Ag-SCy)<sub>n</sub> complex and 0.1 mmol of AgCF<sub>3</sub>COO were added to a vial containing 3 mL DMF solvent and sonicated until soluble and to the resultant clear solution was added dropwise 0.12 mmol pyrazine in 1 mL CH<sub>3</sub>CN solution. The resulting mixture was allowed to slowly evaporate in the dark to give bulk transparent crystals after 24 h. These crystals were then washed with DMF solvent and subjected to vacuum drying for further characterization. Yield = 95 % based on Ag.

**Synthesis of Ag<sub>12</sub>-bpy CAM:** 0.06 mmol of (Ag-SCy)<sub>n</sub> complex and 0.1 mmol of AgCF<sub>3</sub>COO were added to a vial containing 3 mL DMF solvent and kept for stirring, 0.038 mmol (6 mg) 4,4'-Bipyridine in 1.5 mL CH<sub>3</sub>CN solution was added to it. The resulting mixture was filtered after 1 h stirring at 250 rpm. The filtrate was allowed to slowly evaporate in the dark to give bulk transparent hexagonal crystals after 2 days. The crystals were washed with DMF solvent and the solvent was removed from the vial. The crystals were slowly dried for a day in ambient conditions and then vacuum-dried before further characterization. Yield = 20 % based on Ag.

**Synthesis of Ag<sub>12</sub>-bpa CAM:** 0.06 mmol of (Ag-SCy)<sub>n</sub> complex and 0.1 mmol of AgCF<sub>3</sub>COO were added to a vial containing 3 mL DMF solvent and sonicated until soluble and to the resultant clear solution was added dropwise 0.05 mmol 1,2-Bis(4-pyridyl)ethane in 1 mL CH<sub>3</sub>CN solution. The resulting mixture was allowed to slowly evaporate in the dark to give bulk transparent crystals after 24 h. The crystals were washed with DMF solvent before vacuum drying and used for further characterization. Yield = 98 % based on Ag.

**Synthesis of Ag<sub>12</sub>-azopy CAM:** 0.06 mmol of (Ag-SCy)<sub>n</sub> complex and 0.1 mmol of AgCF<sub>3</sub>COO were added to a vial containing 3 mL DMF solvent and sonicated until soluble and to the resultant clear solution was added dropwise 0.05 mmol 4,4'-Azopyridine in 1 mL DMF solution. The resulting mixture was allowed to slowly evaporate in the dark to give bulk orange crystals after 24 h. The crystals were washed with DMF solvent and subjected to vacuum drying for further characterization. Yield = 34 % based on Ag.

## 2. Crystallographic details

### 2.1. Table S1. Crystallographic parameters for Ag<sub>12</sub>-pyz.

| Parameters                                                                                                                                                                                                                     | Ag <sub>12</sub> -pyz                                                                 |
|--------------------------------------------------------------------------------------------------------------------------------------------------------------------------------------------------------------------------------|---------------------------------------------------------------------------------------|
| CCDC number                                                                                                                                                                                                                    | 2342609                                                                               |
| Empirical formula                                                                                                                                                                                                              | C <sub>10</sub> H <sub>15.5</sub> Ag <sub>2</sub> F <sub>3</sub> NO <sub>3.25</sub> S |
| Formula weight                                                                                                                                                                                                                 | 506.53                                                                                |
| Crystal System                                                                                                                                                                                                                 | cubic                                                                                 |
| Space Group                                                                                                                                                                                                                    | <i>Pn-3</i> (No. 201)                                                                 |
| a (Å)                                                                                                                                                                                                                          | 20.9199(3)                                                                            |
| b (Å)                                                                                                                                                                                                                          | 20.9199(3)                                                                            |
| c (Å)                                                                                                                                                                                                                          | 20.9199(3)                                                                            |
| α (°)                                                                                                                                                                                                                          | 90                                                                                    |
| β (°)                                                                                                                                                                                                                          | 90                                                                                    |
| γ (°)                                                                                                                                                                                                                          | 90                                                                                    |
| Volume (Å <sup>3</sup> )                                                                                                                                                                                                       | 9155.4(4)                                                                             |
| Z                                                                                                                                                                                                                              | 24                                                                                    |
| Temperature (K)                                                                                                                                                                                                                | 100                                                                                   |
| Calculated density (g/cm <sup>3</sup> )                                                                                                                                                                                        | 2.205                                                                                 |
| Absorption coefficient (mm <sup>-1</sup> )                                                                                                                                                                                     | 2.714                                                                                 |
| 2θ range (°)                                                                                                                                                                                                                   | 5.806 to 54.964                                                                       |
| Reflections collected                                                                                                                                                                                                          | 62054                                                                                 |
| Unique reflections                                                                                                                                                                                                             | 3516                                                                                  |
| Number of parameters                                                                                                                                                                                                           | 172                                                                                   |
| Goodness-of-fit on F <sup>2</sup>                                                                                                                                                                                              | 1.032                                                                                 |
| Final R indices [I ≥ 2σ(I)]                                                                                                                                                                                                    | R <sub>1</sub> = 0.0313, wR <sub>2</sub> = 0.0694                                     |
| Final R indices (all data)                                                                                                                                                                                                     | R <sub>1</sub> = 0.0341, wR <sub>2</sub> = 0.0716                                     |
| $R_1 = \sum  F_o  -  F_c  / \sum  F_o ; wR_2 = \{ [w(F_o^2 - F_c^2)^2] / [w(F_o^2)] \}^{1/2}; w = 1 / [\sigma^2 (F_o)^2 + (aP)^2 + bP]; P = [\max(F_o^2, 0) + 2(F_c)^2] / 3, \text{ where } a = 0.0221 \text{ and } b = 23.72$ |                                                                                       |

2.2. Table S2. Crystallographic parameters for Ag<sub>12</sub>-bpy.

|                                                                                                                                                                                                                                            |                                                                                                             |
|--------------------------------------------------------------------------------------------------------------------------------------------------------------------------------------------------------------------------------------------|-------------------------------------------------------------------------------------------------------------|
| Parameters                                                                                                                                                                                                                                 | Ag <sub>12</sub> -bpy                                                                                       |
| CCDC number                                                                                                                                                                                                                                | 2379538                                                                                                     |
| Empirical formula                                                                                                                                                                                                                          | C <sub>39</sub> H <sub>45</sub> Ag <sub>6</sub> F <sub>9</sub> N <sub>3</sub> O <sub>6</sub> S <sub>3</sub> |
| Formula weight                                                                                                                                                                                                                             | 1566.18                                                                                                     |
| Crystal System                                                                                                                                                                                                                             | orthorhombic                                                                                                |
| Space Group                                                                                                                                                                                                                                | <i>P n n m</i> (No. 58)                                                                                     |
| a (Å)                                                                                                                                                                                                                                      | 22.946(5)                                                                                                   |
| b (Å)                                                                                                                                                                                                                                      | 27.850(6)                                                                                                   |
| c (Å)                                                                                                                                                                                                                                      | 18.982(4)                                                                                                   |
| α (°)                                                                                                                                                                                                                                      | 90                                                                                                          |
| β (°)                                                                                                                                                                                                                                      | 90                                                                                                          |
| γ (°)                                                                                                                                                                                                                                      | 90                                                                                                          |
| Volume (Å <sup>3</sup> )                                                                                                                                                                                                                   | 12130(4)                                                                                                    |
| Z                                                                                                                                                                                                                                          | 8                                                                                                           |
| Temperature (K)                                                                                                                                                                                                                            | 100                                                                                                         |
| Calculated density (g/cm <sup>3</sup> )                                                                                                                                                                                                    | 1.715                                                                                                       |
| Absorption coefficient (mm <sup>-1</sup> )                                                                                                                                                                                                 | 1.992                                                                                                       |
| 2θ range (°)                                                                                                                                                                                                                               | 2.264 to 51.888                                                                                             |
| Reflections collected                                                                                                                                                                                                                      | 157382                                                                                                      |
| Unique reflections                                                                                                                                                                                                                         | 12774                                                                                                       |
| Number of parameters                                                                                                                                                                                                                       | 632                                                                                                         |
| Goodness-of-fit on F <sup>2</sup>                                                                                                                                                                                                          | 1.127                                                                                                       |
| Final R indices [I ≥ 2σ(I)]                                                                                                                                                                                                                | R <sub>1</sub> = 0.0920, wR <sub>2</sub> = 0.2806                                                           |
| Final R indices (all data)                                                                                                                                                                                                                 | R <sub>1</sub> = 0.1071, wR <sub>2</sub> = 0.2955                                                           |
| $R_1 = \sum   F_0  -  F_c   / \sum  F_0 ; wR_2 = \{ [\sum w(F_0^2 - F_c^2)^2] / [\sum w(F_0^2)^2] \}^{1/2}; w = 1/[\sigma^2 (F_0)^2 + (aP)^2 + bP]; P = [\max(F_0^2, 0) + 2(F_c)^2] / 3, \text{ where } a = 0.1364 \text{ and } b = 41.42$ |                                                                                                             |

2.3. Table S3. Crystallographic parameters for Ag<sub>12</sub>-bpa.

|                                                                                                                                                                                                                                                              |                                                                                                             |
|--------------------------------------------------------------------------------------------------------------------------------------------------------------------------------------------------------------------------------------------------------------|-------------------------------------------------------------------------------------------------------------|
| Parameters                                                                                                                                                                                                                                                   | Ag <sub>12</sub> -bpa                                                                                       |
| CCDC number                                                                                                                                                                                                                                                  | 2379540                                                                                                     |
| Empirical formula                                                                                                                                                                                                                                            | C <sub>45</sub> H <sub>58</sub> Ag <sub>6</sub> F <sub>9</sub> N <sub>4</sub> O <sub>7</sub> S <sub>3</sub> |
| Formula weight                                                                                                                                                                                                                                               | 1681.35                                                                                                     |
| Crystal System                                                                                                                                                                                                                                               | monoclinic                                                                                                  |
| Space Group                                                                                                                                                                                                                                                  | C 2/c (No. 15)                                                                                              |
| a (Å)                                                                                                                                                                                                                                                        | 25.337(5)                                                                                                   |
| b (Å)                                                                                                                                                                                                                                                        | 24.666(5)                                                                                                   |
| c (Å)                                                                                                                                                                                                                                                        | 19.661(4)                                                                                                   |
| α (°)                                                                                                                                                                                                                                                        | 90                                                                                                          |
| β (°)                                                                                                                                                                                                                                                        | 109.96(3)                                                                                                   |
| γ (°)                                                                                                                                                                                                                                                        | 90                                                                                                          |
| Volume (Å <sup>3</sup> )                                                                                                                                                                                                                                     | 11549(4)                                                                                                    |
| Z                                                                                                                                                                                                                                                            | 8                                                                                                           |
| Temperature (K)                                                                                                                                                                                                                                              | 100                                                                                                         |
| Calculated density (g/cm <sup>3</sup> )                                                                                                                                                                                                                      | 1.934                                                                                                       |
| Absorption coefficient (mm <sup>-1</sup> )                                                                                                                                                                                                                   | 2.101                                                                                                       |
| 2θ range (°)                                                                                                                                                                                                                                                 | 2.342 to 59.81                                                                                              |
| Reflections collected                                                                                                                                                                                                                                        | 92731                                                                                                       |
| Unique reflections                                                                                                                                                                                                                                           | 17230                                                                                                       |
| Number of parameters                                                                                                                                                                                                                                         | 733                                                                                                         |
| Goodness-of-fit on F <sup>2</sup>                                                                                                                                                                                                                            | 1.005                                                                                                       |
| Final R indices [I ≥ 2σ(I)]                                                                                                                                                                                                                                  | R <sub>1</sub> = 0.0399, wR <sub>2</sub> = 0.1114                                                           |
| Final R indices (all data)                                                                                                                                                                                                                                   | R <sub>1</sub> = 0.0439, wR <sub>2</sub> = 0.1144                                                           |
| $R_1 = \frac{\sum   F_o  -  F_c  }{\sum  F_o }; wR_2 = \left\{ \frac{\sum [w(F_o^2 - F_c^2)^2]}{\sum [w(F_o^2)]} \right\}^{1/2}; w = 1/[\sigma^2(F_o)^2 + (aP)^2 + bP]; P = [\max(F_o^2, 0) + 2(F_c)^2]/3, \text{ where } a = 0.0532 \text{ and } b = 32.72$ |                                                                                                             |



2.4. Table S4. Crystallographic parameters for Ag<sub>12</sub>-azopy.

|                                                                                                                                                                                                                                            |                                                                                                             |
|--------------------------------------------------------------------------------------------------------------------------------------------------------------------------------------------------------------------------------------------|-------------------------------------------------------------------------------------------------------------|
| Parameters                                                                                                                                                                                                                                 | Ag <sub>12</sub> -azopy                                                                                     |
| CCDC number                                                                                                                                                                                                                                | 2379541                                                                                                     |
| Empirical formula                                                                                                                                                                                                                          | C <sub>42</sub> H <sub>52</sub> Ag <sub>6</sub> F <sub>9</sub> N <sub>7</sub> O <sub>7</sub> S <sub>3</sub> |
| Formula weight                                                                                                                                                                                                                             | 1681.30                                                                                                     |
| Crystal System                                                                                                                                                                                                                             | monoclinic                                                                                                  |
| Space Group                                                                                                                                                                                                                                | C 2/c (No. 15)                                                                                              |
| a (Å)                                                                                                                                                                                                                                      | 26.994(5)                                                                                                   |
| b (Å)                                                                                                                                                                                                                                      | 14.021(3)                                                                                                   |
| c (Å)                                                                                                                                                                                                                                      | 29.259(6)                                                                                                   |
| α (°)                                                                                                                                                                                                                                      | 90                                                                                                          |
| β (°)                                                                                                                                                                                                                                      | 92.57(3)                                                                                                    |
| γ (°)                                                                                                                                                                                                                                      | 90                                                                                                          |
| Volume (Å <sup>3</sup> )                                                                                                                                                                                                                   | 11063(4)                                                                                                    |
| Z                                                                                                                                                                                                                                          | 8                                                                                                           |
| Temperature (K)                                                                                                                                                                                                                            | 90                                                                                                          |
| Calculated density (g/cm <sup>3</sup> )                                                                                                                                                                                                    | 2.019                                                                                                       |
| Absorption coefficient (mm <sup>-1</sup> )                                                                                                                                                                                                 | 2.195                                                                                                       |
| 2θ range (°)                                                                                                                                                                                                                               | 3.224 to 49.996                                                                                             |
| Reflections collected                                                                                                                                                                                                                      | 61389                                                                                                       |
| Unique reflections                                                                                                                                                                                                                         | 9951                                                                                                        |
| Number of parameters                                                                                                                                                                                                                       | 686                                                                                                         |
| Goodness-of-fit on F <sup>2</sup>                                                                                                                                                                                                          | 1.068                                                                                                       |
| Final R indices [I >= 2sigma(I)]                                                                                                                                                                                                           | R <sub>1</sub> = 0.0626, wR <sub>2</sub> = 0.1860                                                           |
| Final R indices (all data)                                                                                                                                                                                                                 | R <sub>1</sub> = 0.0680, wR <sub>2</sub> = 0.1931                                                           |
| $R_1 = \sum   F_o  -  F_c   / \sum  F_o ; wR_2 = \{ [\sum w(F_o^2 - F_c^2)^2] / [\sum w(F_o^2)^2] \}^{1/2}; w = 1/[\sigma^2 (F_o)^2 + (aP)^2 + bP]; P = [\max(F_o^2, 0) + 2(F_c)^2] / 3, \text{ where } a = 0.1172 \text{ and } b = 71.45$ |                                                                                                             |

2.5. Table S5. Table showing all possible Ag...Ag interactions in the 5 assemblies.

|                                                                                     | Ag <sub>12</sub> -pyz (Å) | Ag <sub>12</sub> -bpy (Å) | Ag <sub>12</sub> -bpa (Å) | Ag <sub>12</sub> -azopy (Å) | Ag <sub>12</sub> -py (Å) |
|-------------------------------------------------------------------------------------|---------------------------|---------------------------|---------------------------|-----------------------------|--------------------------|
| 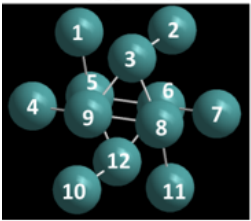   |                           |                           | 1-2: 3.19                 |                             |                          |
|                                                                                     | 1-3: 2.92                 | 1-3: 3.40                 | 1-3: 3.16                 | 1-3 : 3.03                  | 1-3: 3.21                |
|                                                                                     |                           | 1-4: 3.35                 |                           |                             |                          |
|                                                                                     |                           | 1-5: 3.32                 | 1-5: 3.28                 | 1-5: 3.30                   | 1-5: 3.38                |
|    | 2-6: 2.92                 | 2-6: 3.18                 |                           | 2-6: 3.19                   | 2-6: 3.08                |
|                                                                                     |                           |                           |                           | 2-7 :3.38                   |                          |
|                                                                                     |                           | 3-2: 2.96                 | 3-2:3.04                  | 3-2: 3.18                   |                          |
|   | 3-9: 2.95                 | 3-9: 3.03                 | 3-9: 3.00                 | 3-9: 2.94                   | 3-9: 3.03                |
|                                                                                     | 3-8: 2.95                 | 3-8: 2.97                 | 3-8: 2.99                 | 3-8: 3.14                   | 3-8: 2.98                |
|                                                                                     | 4-5: 2.92                 | 4-5: 3.07                 | 4-5: 3.06                 | 4-5: 3.35                   | 4-5: 3.21                |
|                                                                                     |                           | 4-9: 3.27                 | 4-9: 3.15                 | 4-9: 3.04                   | 4-9: 3.10                |
|                                                                                     |                           |                           |                           | 4-10: 3.38                  |                          |
|  | 5-6: 2.95                 | 5-6: 3.09                 | 5-6: 3.06                 | 5-6: 3.03                   | 5-6: 2.91                |
|                                                                                     | 5-12: 2.95                | 5-12: 2.74                | 5-12:2.99                 | 5-12: 3.14                  | 5-12: 2.98               |
|                                                                                     | 6-12: 2.95                | 6-12: 3.09                | 6-12: 3.00                | 6-12: 2.94                  | 6-12: 3.03               |
|                                                                                     |                           | 7-6: 3.18                 | 7-6: 3.15                 | 7-6: 3.04                   | 7-6: 3.10                |
|  | 7-8: 2.92                 | 8-7: 2.96                 | 7-8: 3.06                 | 7-8: 3.35                   | 7-8: 3.21                |
|                                                                                     | 8-9: 2.95                 | 8-9: 3.03                 | 8-9: 3.06                 | 8-9: 3.03                   | 8-9: 2.91                |
|                                                                                     |                           | 8-11: 3.40                | 8-11: 3.28                | 8-11: 3.30                  | 8-11: 3.39               |
|                                                                                     | 9-10: 2.92                | 9-10: 3.27                |                           | 9-10: 3.19                  | 9-10: 3.08               |
|                                                                                     |                           | 10-11: 3.35               | 10-11: 3.19               |                             |                          |
|                                                                                     |                           | 10-12: 3.07               | 10-12: 3.04               | 10-12: 3.18                 |                          |
|                                                                                     | 11-12: 2.92               | 11-12:3.32                | 11-12: 3.16               | 11-12: 3.03                 | 11-12: 3.21              |
| <b>Argentophilic Interactions</b>                                                   | <b>12</b>                 | <b>20</b>                 | <b>18</b>                 | <b>20</b>                   | <b>16</b>                |
| ~Ag...Ag distance                                                                   | <b>2.93</b>               | <b>3.15</b>               | <b>3.10</b>               | <b>3.15</b>                 | <b>3.11</b>              |
| ~ Ag-S distance                                                                     | <b>2.51</b>               | <b>2.47</b>               | <b>2.49</b>               | <b>2.48</b>                 | <b>2.49</b>              |

### 3. Optical microscopic images

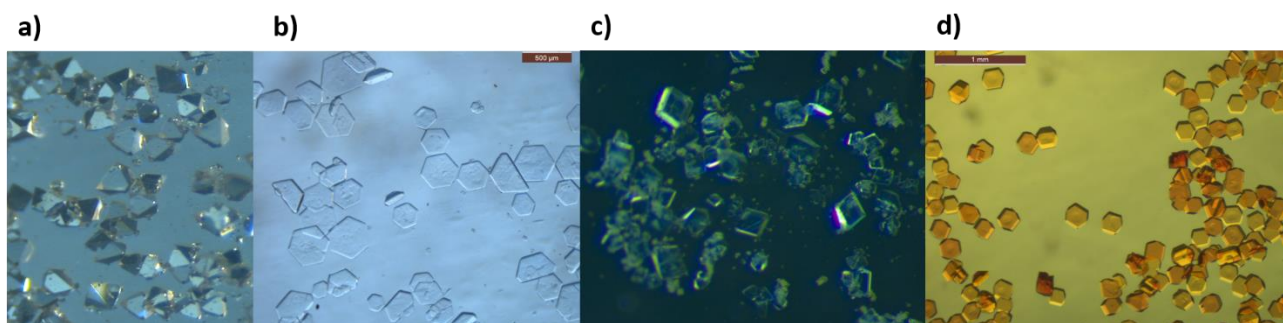

**Figure S1.** Optical microscopic image of a) Ag<sub>12</sub>-pyz, b) Ag<sub>12</sub>-bpy, c) Ag<sub>12</sub>-bpa, d) Ag<sub>12</sub>-azopy crystals.

## 4. Crystal structure

### 4.1. Crystal structure of Ag<sub>12</sub>-pyz

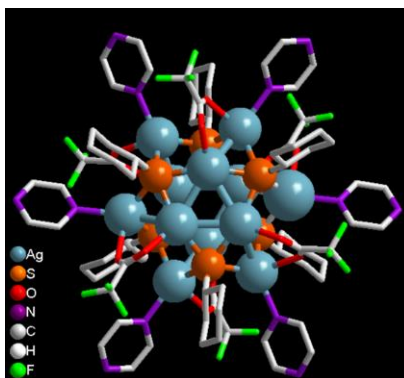

**Figure S2.** Schematic representation of the Ag<sub>12</sub> cluster surrounded by SCy<sup>-</sup> & CF<sub>3</sub>COO<sup>-</sup> ligands and pyrazine linker in Ag<sub>12</sub>-pyz CAM. Color code: Ag: blue, S: orange, O: red, F: green, N: violet, C: grey. H atoms and disorder atoms are omitted for clarity.

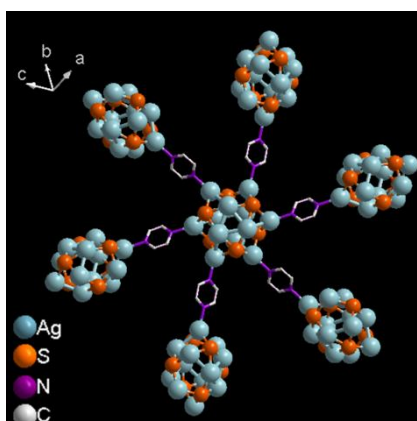

**Figure S3.** a) Each cluster connects to six other clusters with the bidentate pyrazine linker. Color code: Ag: blue, S: orange, N: violet, C: grey.

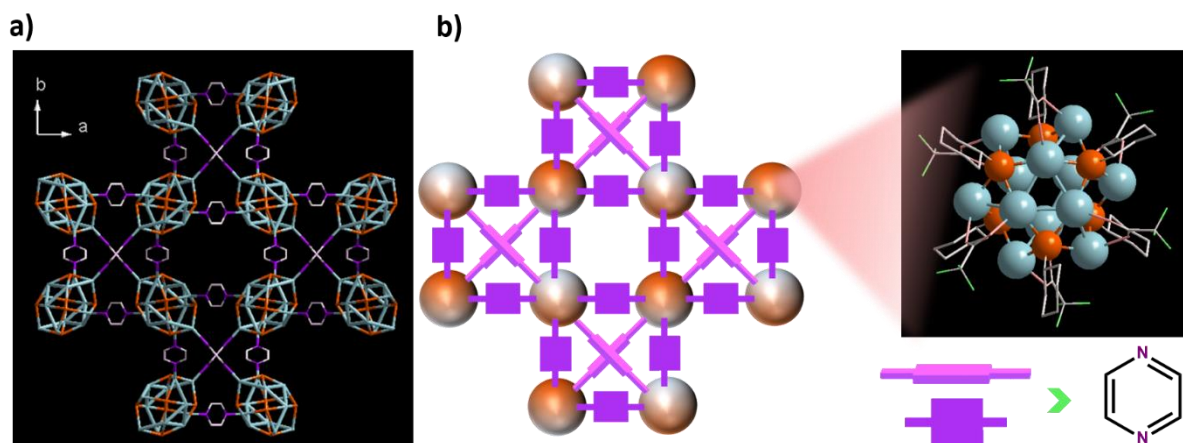

**Figure S4.** (a) Small unit of three-dimensionally extended Ag<sub>12</sub>-pyz CAM (along *c* direction), (b) Topology view of the same. Color code: Ag: blue, S: orange, N: violet, O: red, F: green C: grey.

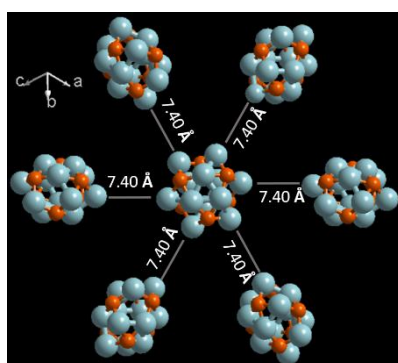

**Figure S5.** The shortest Ag ... Ag distance between two clusters in 7.40 Å. Color code: Ag: blue, S: orange.

## 4.2. Crystal structure of Ag<sub>12</sub>-bpy

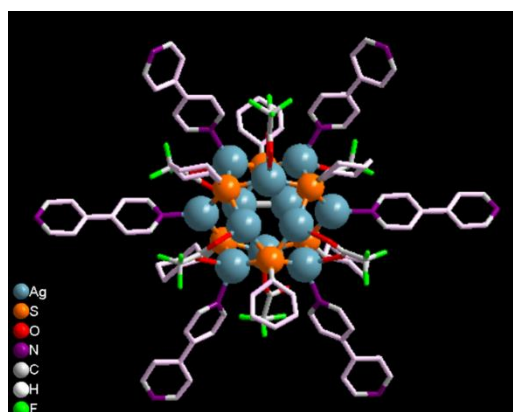

**Figure S6.** Schematic representation of the Ag<sub>12</sub> cluster surrounded by SCy<sup>-</sup> & CF<sub>3</sub>COO<sup>-</sup> ligands and 4,4'-Bipyridine linker. Color code: Ag: blue, S: orange, O: red, F: green, N: violet, C: grey.

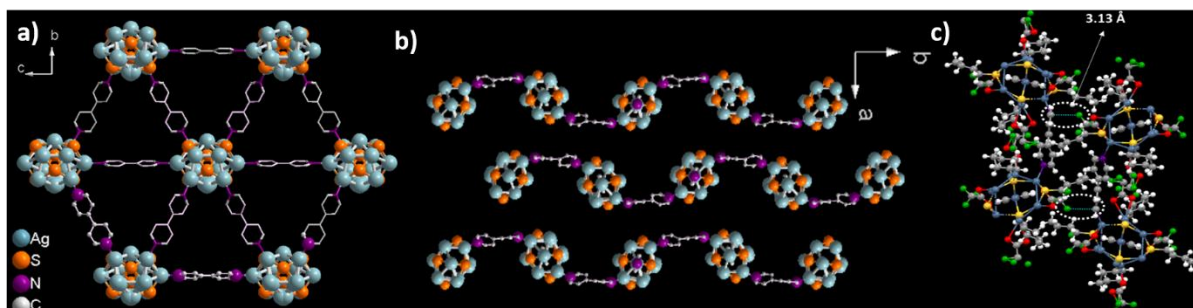

**Figure S7.** Each cluster connects to six other clusters with the bidentate 4,4'-Bipyridine linker and extends in two-dimension, b) the stacked 2D layers viewed along *ab* plane, c) These layers are connected by F...C interactions (3.13 Å). These interactions are studied using mercury software. Color code: Ag: blue, S: orange, O: red, F: green, N: violet, C: grey.

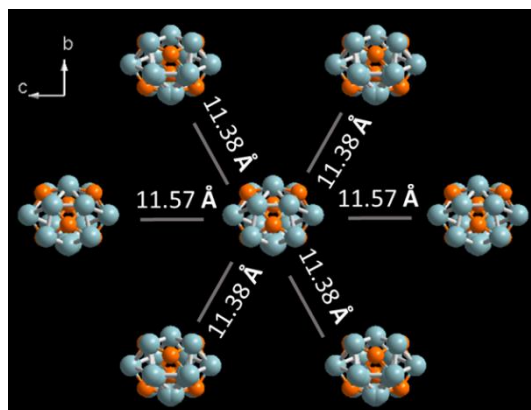

**Figure S8.** The shortest Ag ... Ag distance between two clusters in *bc* plane 11.38 & 11.57 Å. Color code: Ag: blue, S: orange.

#### 4.3. Crystal structure of Ag<sub>12</sub>-bpa

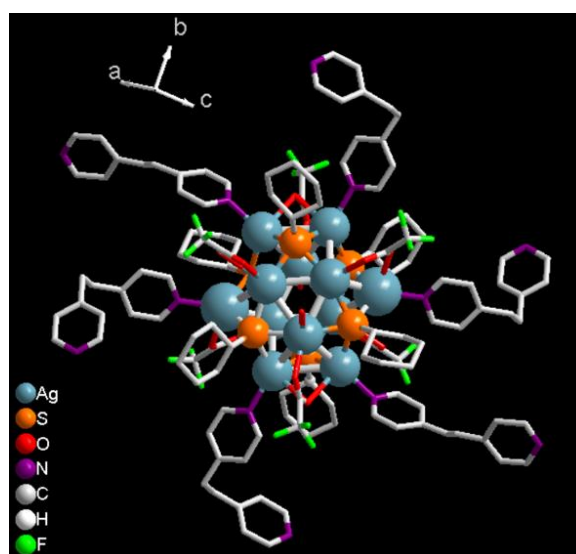

**Figure S9.** Schematic representation of the Ag<sub>12</sub> cluster surrounded by SCy<sup>-</sup> & CF<sub>3</sub>COO<sup>-</sup> ligands and 1,2-Bis(4-pyridyl)ethane linker. Color code: Ag: blue, S: orange, O: red, F: green, N: violet, C: grey.

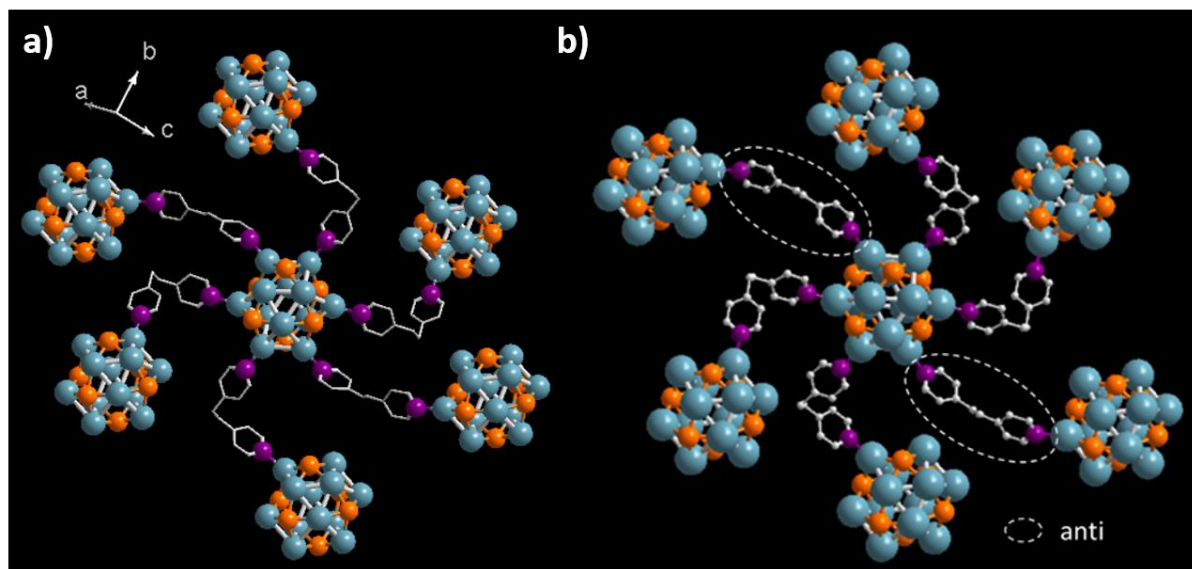

**Figure S10.** a) Each cluster connects to six other clusters with the bidentate bpa linker, b) Schematic representation of  $\text{Ag}_{12}$ -bpa CAM showing the anti-gauche conformations of bpa linker. The white dotted circle represents the anti-conformation of the bpa linker, the remaining four linkers are in gauche conformation. Color code: Ag: blue, S: orange, N: violet, C: grey.

Bpa linker with its flexibility (conferred by its  $-\text{CH}_2-\text{CH}_2-$  backbone) can adopt anti and gauche conformations, here out of six linkers, four are in gauche and two are in anti-conformations. This flexibility in bpa linker has led to its 3D structure.

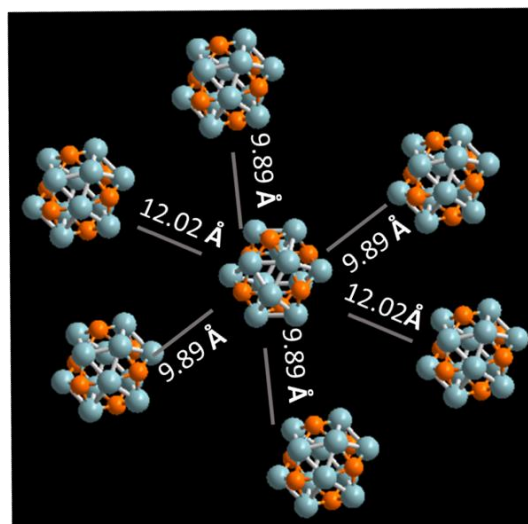

**Figure S11.** The shortest Ag ... Ag distance between two clusters is 9.89 & 12.02 Å. Color code: Ag: blue, S: orange.



#### 4.4. Crystal structure of Ag<sub>12</sub>-azopy

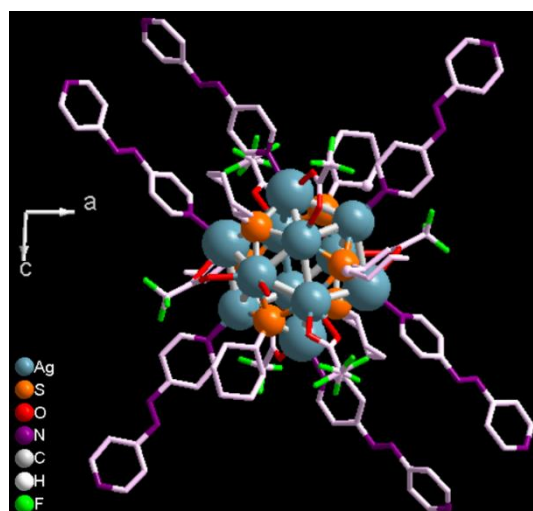

**Figure S12.** Schematic representation of the Ag<sub>12</sub> cluster surrounded by SCy<sup>-</sup> & CF<sub>3</sub>COO<sup>-</sup> ligands and 4,4'-Azopyridine linker. Color code: Ag: blue, S: orange, O: red, F: green, N: violet, C: grey.

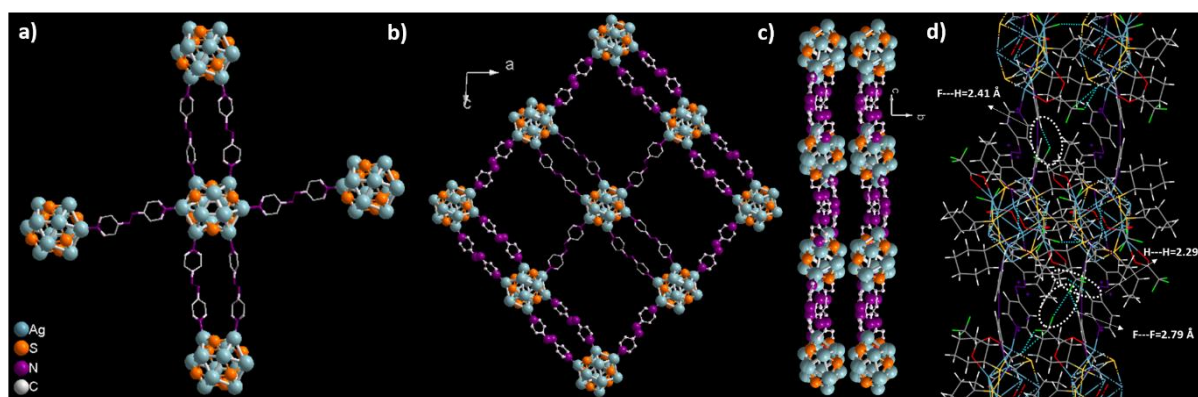

**Figure S13.** a) Each cluster connects to six other clusters with the bidentate azo-py linker and, b) extends in two-dimension, c) The 2D stacked layers are viewed along *bc* plane, d) These layers are connected by F---F (2.79 Å), F---H (2.41 Å), and H---H (2.29 Å) interactions. Two DMF molecules also show H---H (2.26 Å) interactions between them. Color code: Ag: blue, S: orange, O: red, F: green, N: violet, C: grey.

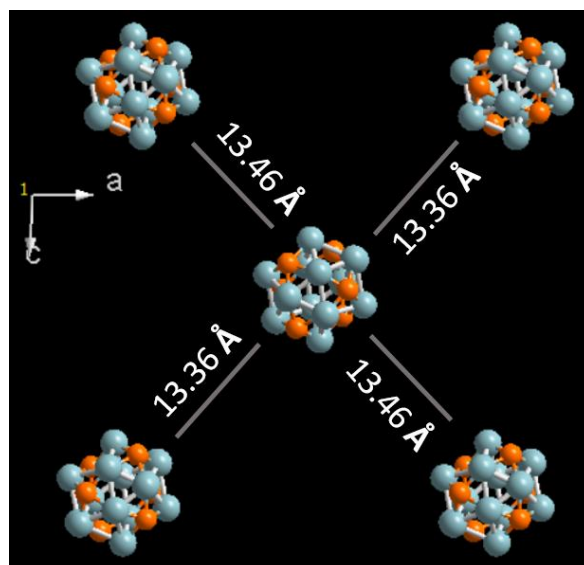

**Figure S14.** The shortest Ag ... Ag distance between two clusters in *ac* plane 13.36 & 13.46 Å. Color code: Ag: blue, S: orange.

#### 4.5. Crystal structure of Ag<sub>12</sub>-py

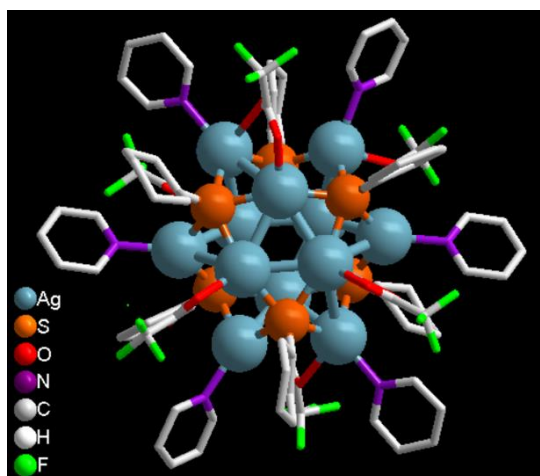

**Figure S15.** a) Schematic representation of the Ag<sub>12</sub> cluster surrounded by SCy- & CF<sub>3</sub>COO- ligands and pyridine ligand. Color code: Ag: blue, S: orange, O: red, F: green, N: violet, C: grey.

Note: This crystal structure was earlier reported by us<sup>14</sup>. We have redrawn using the same crystal structure.

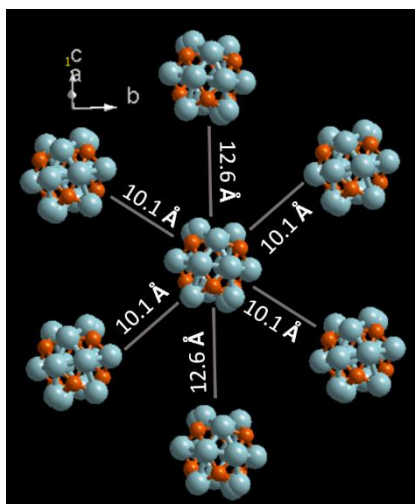

**Figure S16.** The shortest Ag ... Ag distance between two clusters in *bc* plane is 10.1 & 12.6 Å. Color code: Ag: blue, S: orange.

**Table S6.** Table showing Ag...Ag inter/intra cluster distance in the five cluster assemblies

| Ag—Ag distance    | Ag <sub>12</sub> -pyz | Ag <sub>12</sub> -bpa | Ag <sub>12</sub> -py | Ag <sub>12</sub> -bpy | Ag <sub>12</sub> -azopy |
|-------------------|-----------------------|-----------------------|----------------------|-----------------------|-------------------------|
| Intra-cluster (Å) | 2.93                  | 3.10                  | 3.11                 | 3.15                  | 3.15                    |
| Inter-cluster (Å) | 7.40                  | 9.89                  | 10.1                 | 11.38                 | 13.36                   |

## 5. Characterizations

### 5.1. Powder XRD

Le Bail analysis of the XRD patterns is performed for all the samples using the FullProf package taking the initial structural parameters from the single-crystal data, the data produced well fits the experimental analysis.

For Ag<sub>12</sub>-pyz, all the peaks were fitted using a cubic (*Pn-3*) crystal system. The best-fit parameters were obtained to be [*a* = 21.0822 Å, *b* = 21.0822 Å, *c* = 21.0822 Å,  $\alpha = 90^\circ$ ,  $\beta = 90^\circ$ ,  $\delta = 90^\circ$ , and  $\chi^2 = 4.87$ ], which are in good agreement with the single crystal XRD data.

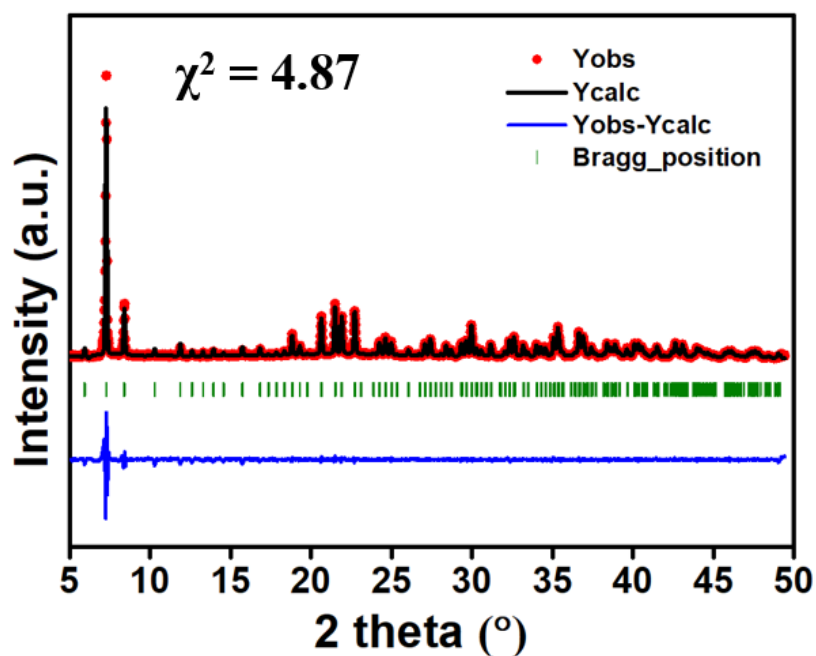

**Figure S17.** Powder XRD pattern of Ag<sub>12</sub>-pyz. As synthesized (red line), the solid black line represents the Le-Bail fit, with vertical bars showing the expected Bragg peak positions. The solid blue line indicates the difference between experimental and calculated intensities.

For Ag<sub>12</sub>-bpy, all the peaks were fitted using an orthorhombic (*Pnmm*) crystal system. The best-fit parameters were obtained to be [*a* = 23.1032 Å, *b* = 27.8838 Å, *c* = 18.8240 Å,  $\alpha = 90^\circ$ ,  $\beta = 90^\circ$ ,  $\delta = 90^\circ$ , and  $\chi^2 = 2.25$ ], which are in good agreement with the single crystal XRD data.

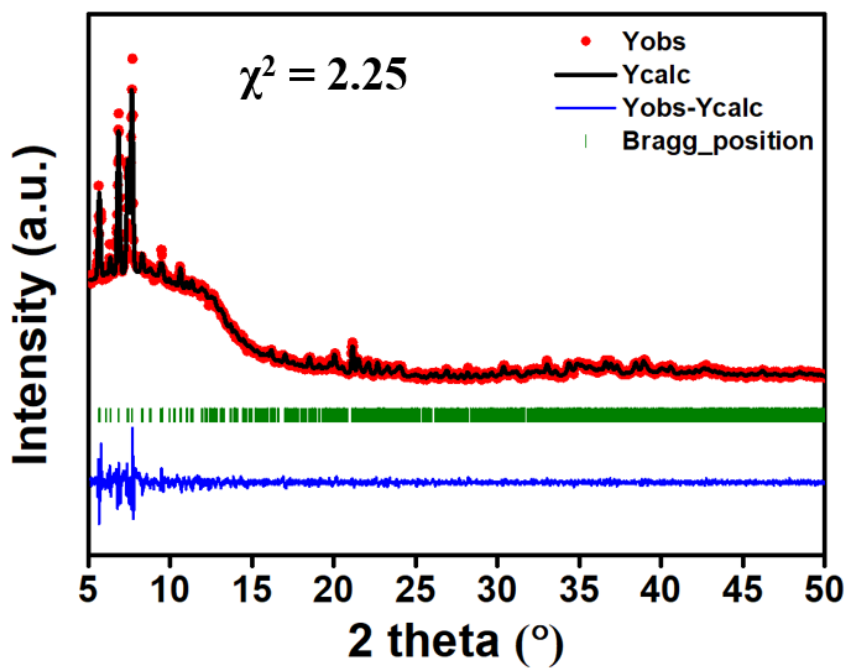

**Figure S18.** Powder XRD pattern of Ag<sub>12</sub>-bpy. As synthesized (red line), the solid black line represents the Le-Bail fit, vertical bars showing the expected Bragg peak positions. The solid blue line indicates the difference between experimental and calculated intensities.

For Ag<sub>12</sub>-bpa, all the peaks were fitted using monoclinic (*C2/c*) crystal system. The best-fit parameters were obtained to be [*a* = 25.3355 Å, *b* = 24.7027 Å, *c* = 19.7430 Å,  $\alpha$  = 90 °,  $\beta$  = 109.816 °,  $\delta$  = 90 °, and  $\chi^2$  = 4.89], which are in good agreement with the single crystal XRD data.

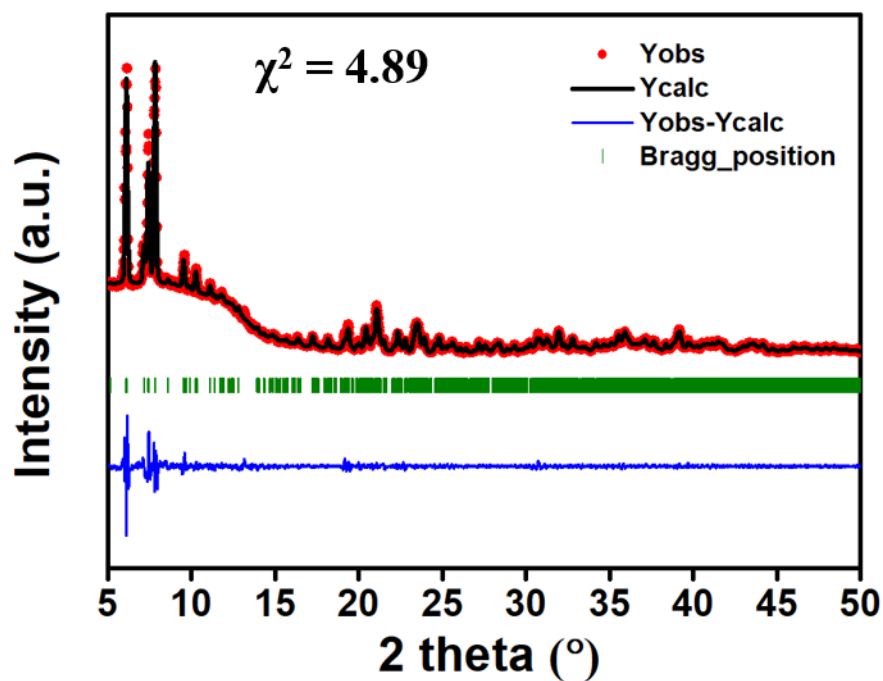

**Figure S19.** Powder XRD pattern of Ag<sub>12</sub>-bpa. As synthesized (red line), the solid black line represents the Le-Bail fit, vertical bars showing the expected Bragg peak positions. The solid blue line indicates the difference between experimental and calculated intensities.

For Ag<sub>12</sub>-azopy, all the peaks were fitted using monoclinic (*C2/c*) crystal system. The best-fit parameters were obtained to be [*a* = 27.0063 Å, *b* = 14.1917 Å, *c* = 29.3766 Å,  $\alpha$  = 90 °,  $\beta$  = 92.656 °,  $\delta$  = 90 °, and  $\chi^2$  = 2.65], which are in good agreement with the single crystal XRD data.

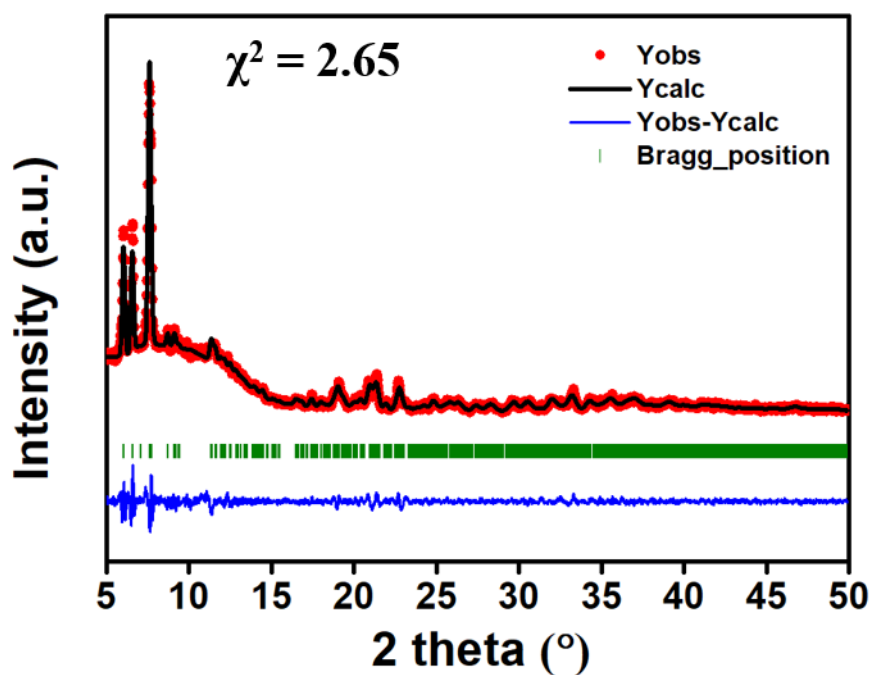

**Figure S20.** Powder XRD pattern of Ag<sub>12</sub>-azopy. As synthesized (red line), the solid black line represents the Le-Bail fit, vertical bars showing the expected Bragg peak positions. The solid blue line indicates the difference between experimental and calculated intensities.

For Ag<sub>12</sub>-py, all the peaks were fitted using monoclinic (*P2/n*) crystal system. The best-fit parameters were obtained to be [ $a = 12.8170 \text{ \AA}$ ,  $b = 27.7169 \text{ \AA}$ ,  $c = 15.3524 \text{ \AA}$ ,  $\alpha = 90^\circ$ ,  $\beta = 100.421^\circ$ ,  $\delta = 90^\circ$ , and  $\chi^2 = 2.03$ ], which are in good agreement with the single crystal XRD data.

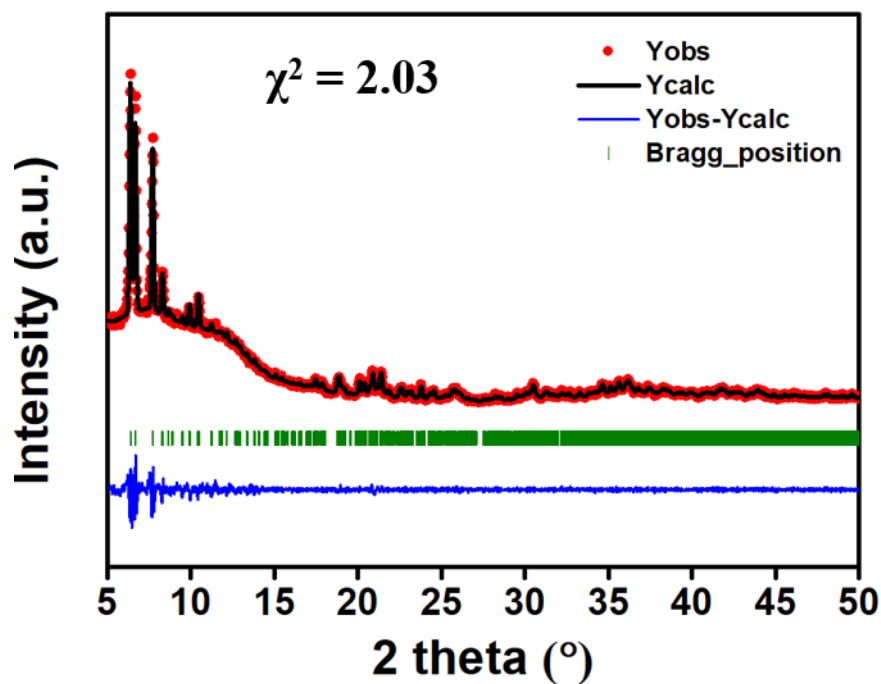

**Figure S21.** Powder XRD pattern of Ag<sub>12</sub>-py. As synthesized (red line), the solid black line represents the Le-Bail fit, vertical bars showing the expected Bragg peak positions. The solid blue line indicates the difference between experimental and calculated intensities.



## 5.2. Scanning Electron Microscope (SEM) and Energy Dispersive X-ray Spectroscopy (EDS)

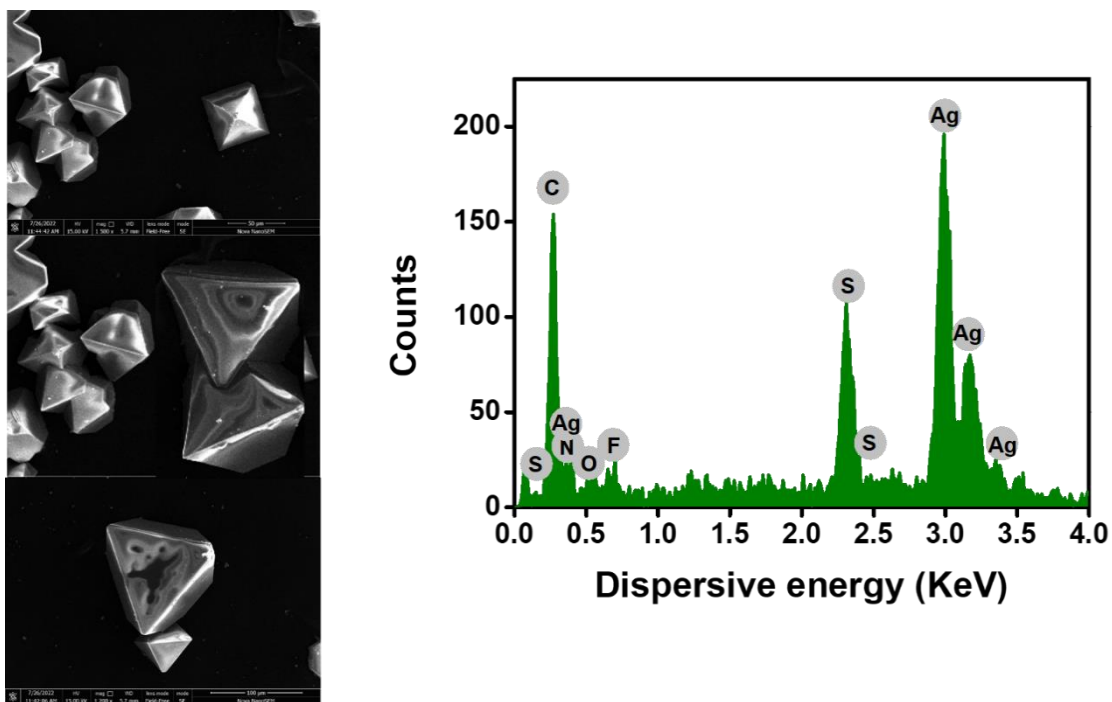

**Figure S22.** (Left) Morphology (3D- octahedral like) of  $\text{Ag}_{12}\text{-pyz}$  by SEM, (right) EDS elemental mapping showing the presence of all the desired elements.

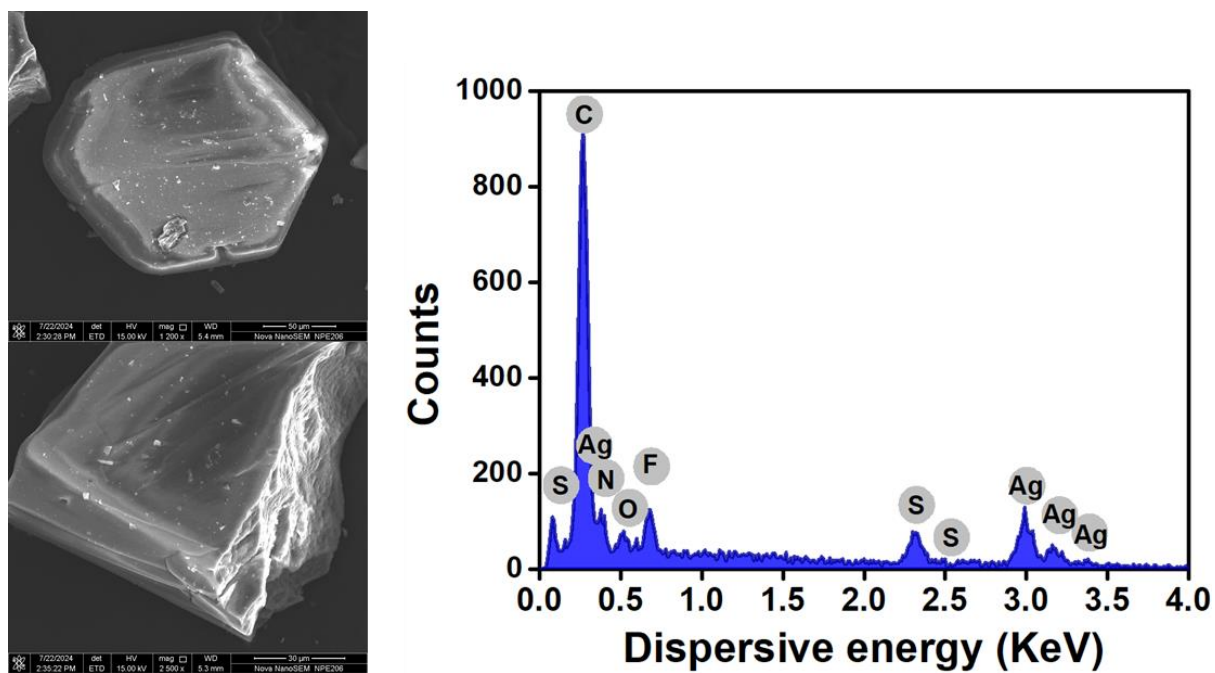

**Figure S23.** (Left) Morphology (hexagonal) of Ag<sub>12</sub>-bpy by SEM, (right) EDS elemental mapping showing the presence of all the desired elements.

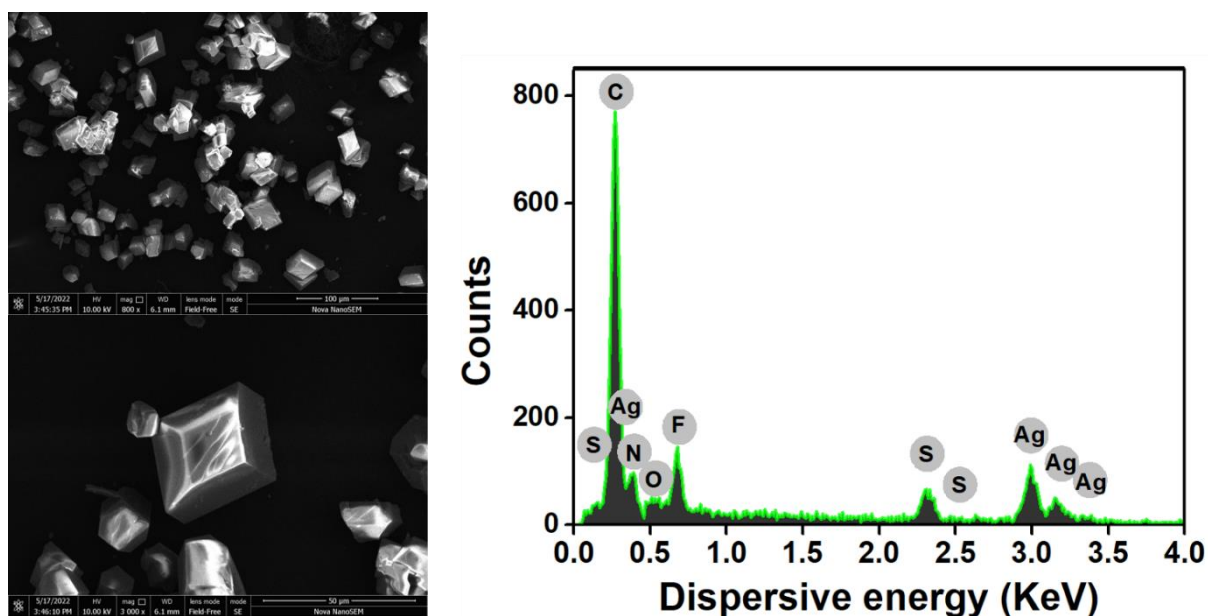

**Figure S24.** (Left) Morphology (block like) of Ag<sub>12</sub>-bpa by SEM, (right) EDS elemental mapping showing the presence of all the desired elements.

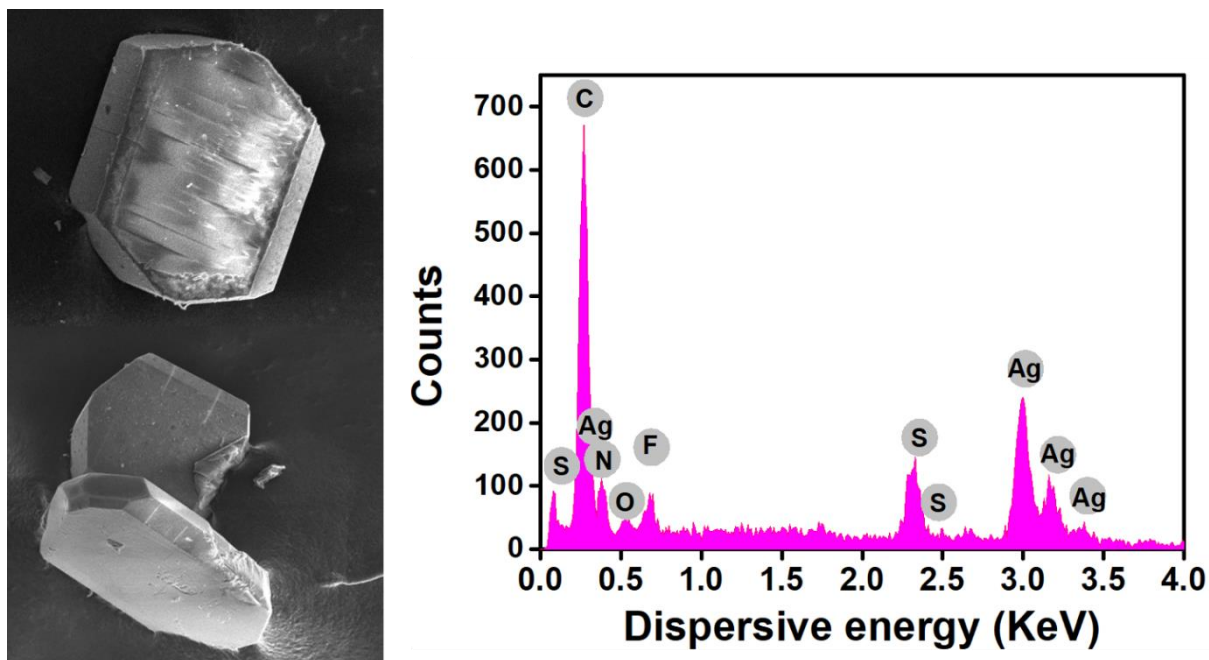

**Figure S25.** (Left) Morphology (hexagonal) of Ag<sub>12</sub>-azopy by SEM, (right) EDS elemental mapping showing the presence of all the desired elements.

### 5.3. X-ray Photoelectron Spectroscopy (XPS)

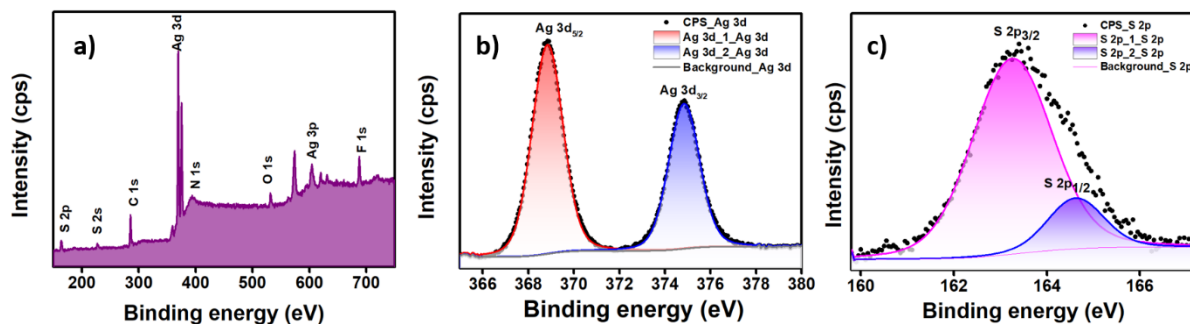

**Figure S26.** (a) XPS survey spectrum, (b) and (c) deconvoluted spectra of Ag and S elements present in Ag<sub>12</sub>-pyz.

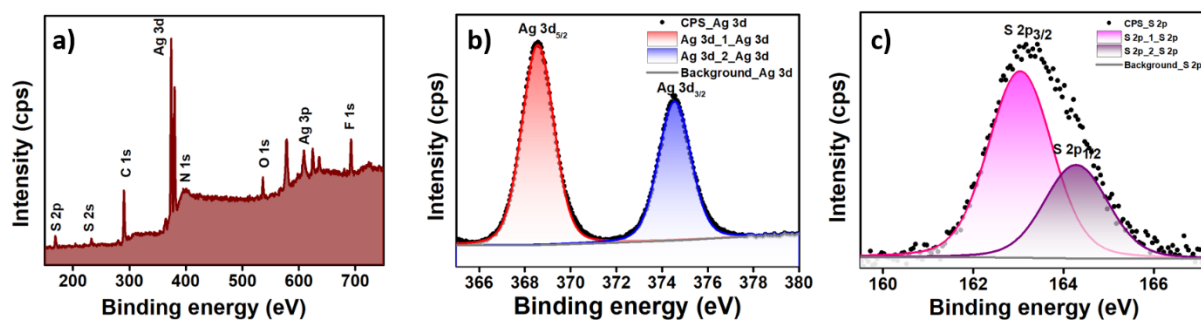

**Figure S27.** (a) XPS survey spectrum, (b) and (c) deconvoluted spectra of Ag and S elements present in Ag<sub>12</sub>-bpy.

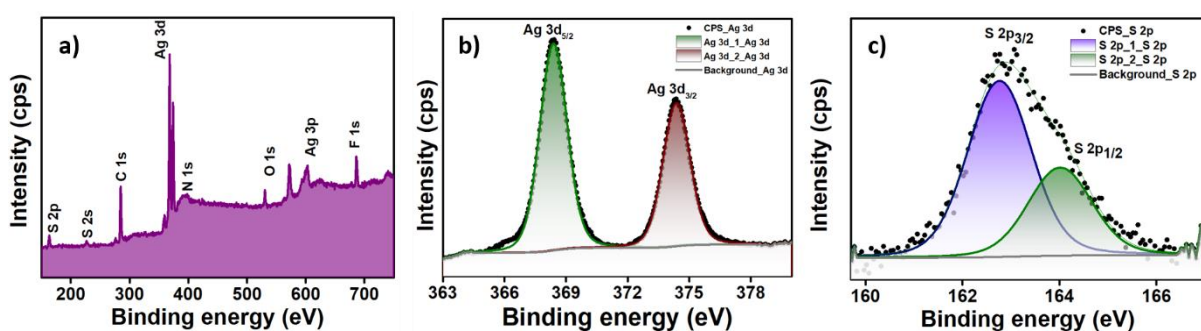

**Figure S28.** (a) XPS survey spectrum, (b) and (c) deconvoluted spectra of Ag and S elements present in Ag<sub>12</sub>-bpa.

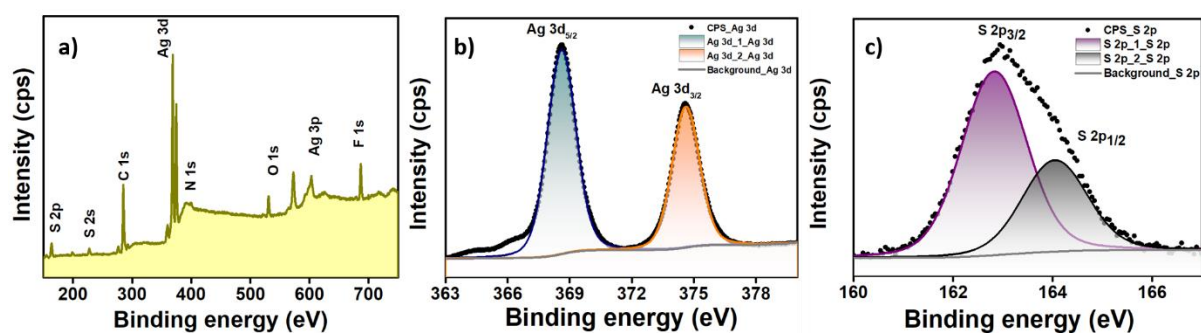

**Figure S29.** (a) XPS survey spectrum, (b) and (c) deconvoluted spectra of Ag and S elements present in Ag<sub>12</sub>-azopy.

## 5.4. Thermal stability

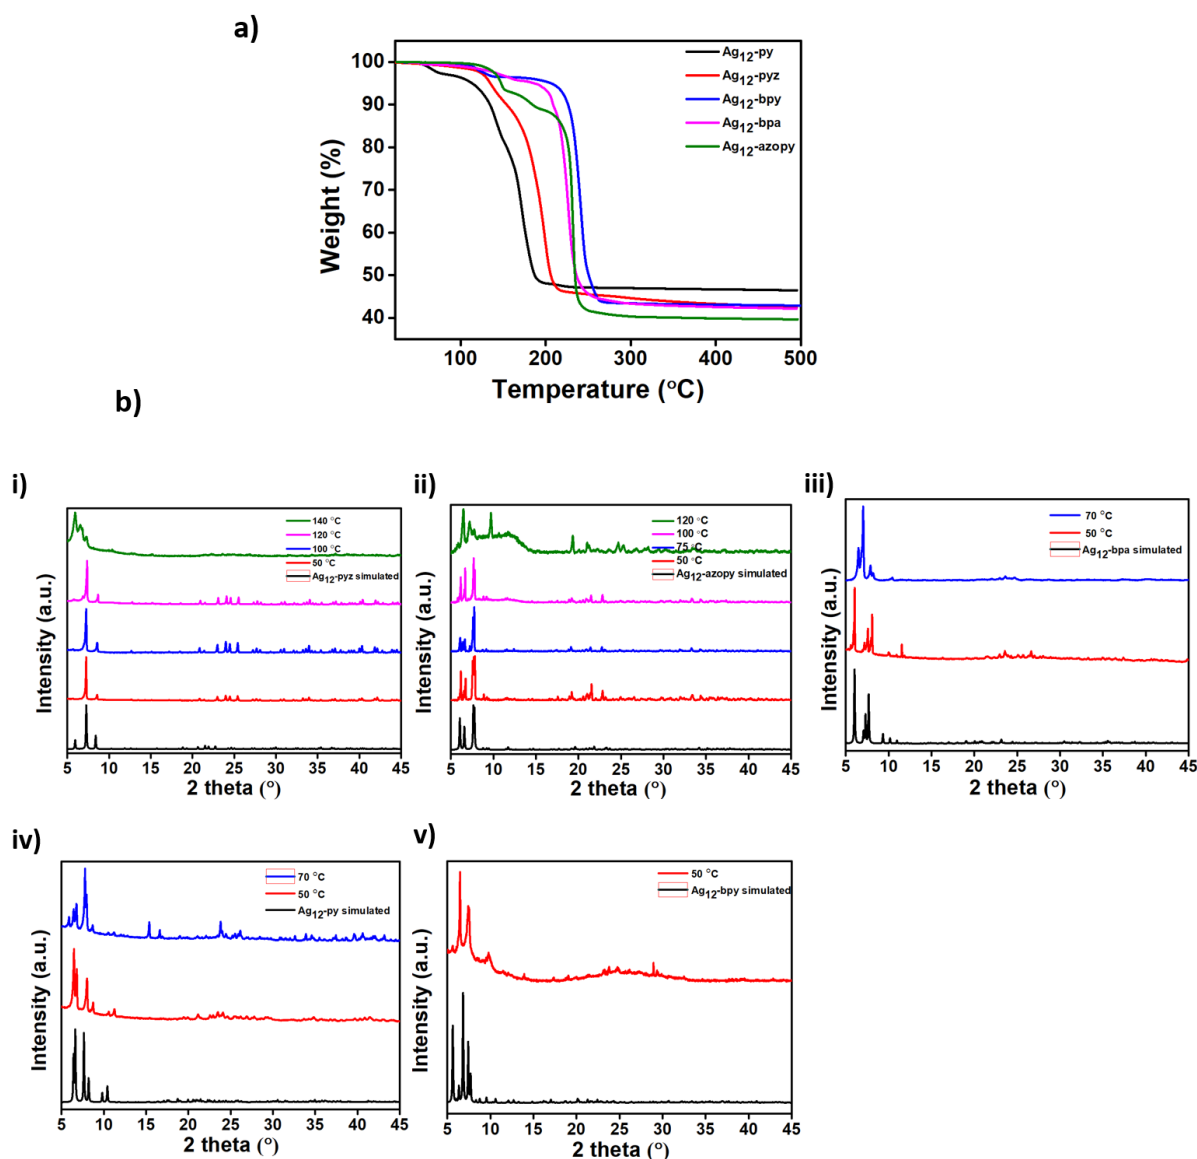

**Figure S30.** a) Thermogravimetric analysis of Ag<sub>12</sub>-pyz, Ag<sub>12</sub>-bpy, Ag<sub>12</sub>-bpa, Ag<sub>12</sub>-azopy which is thermally stable up to ~ 130 °C and the Ag<sub>12</sub>-py is stable up to ~ 60 °C. Whereas the retention of structural integrity at elevated temperatures is confirmed by, b) PXRD, i) Ag<sub>12</sub>-pyz stable up to 120 °C, ii) Ag<sub>12</sub>-azopy up to 100 °C, iii) Ag<sub>12</sub>-bpa and iv) Ag<sub>12</sub>-py up to 50 °C, v) whereas, Ag<sub>12</sub>-bpy is not stable at 50 °C.

Discussion: The 2D Ag<sub>12</sub>-bpy assembly demonstrates lower stability compared to Ag<sub>12</sub>-azopy. This reduced stability may be due to the layer-sliding in the 2D structure of Ag<sub>12</sub>-bpy, which is only stabilized by C---F interactions. Whereas, in Ag<sub>12</sub>-azopy, the layers are stabilized by multiple interactions, including F---F, F---H, and H---H.

## 6. Water stability of Ag<sub>12</sub>-pyz

Le Bail analysis of the XRD patterns is performed for the samples using the FullProf package taking the initial structural parameters from the single-crystal data, the data produced well fits the experimental analysis.

For the stability test for Ag<sub>12</sub>-pyz in water, the best-fit parameters were obtained to be [ $a = 21.0650 \text{ \AA}$ ,  $b = 21.0650 \text{ \AA}$ ,  $c = 21.0650 \text{ \AA}$ ,  $\alpha = 90^\circ$ ,  $\beta = 90^\circ$ ,  $\delta = 90^\circ$ , and  $\chi^2 = 3.63$ ], which are in good agreement with the single crystal XRD data.

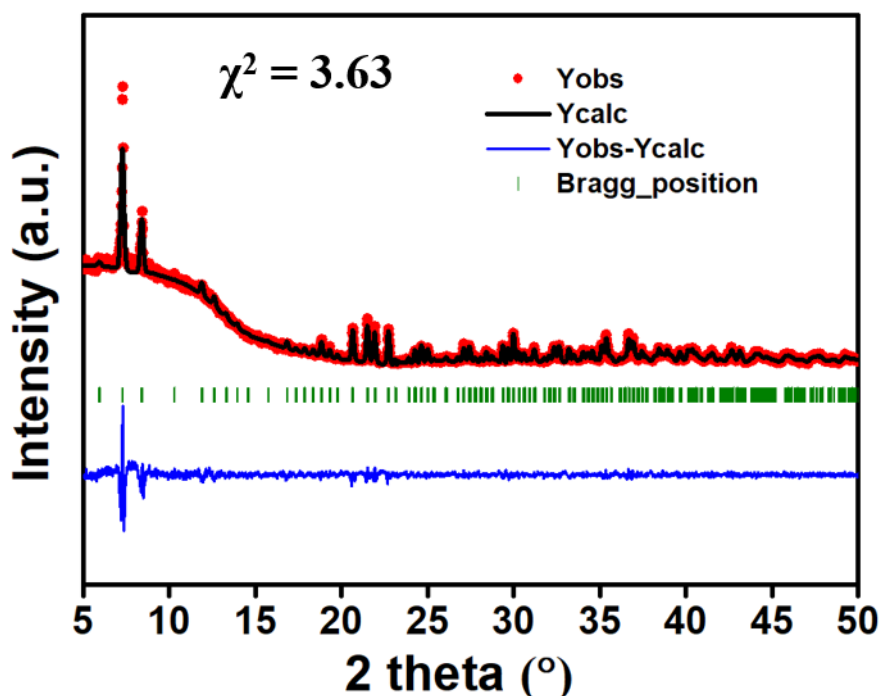

**Figure S31.** The water stability of Ag<sub>12</sub>-pyz CAM was determined by dipping the crystals in distilled water for 24 h and the PXRD pattern of the dried samples matched with the simulated pattern. The solid black line represents the Le-Bail fit, vertical bars showing the expected Bragg peak positions. The solid blue line indicates the differences between experimental and calculated intensities.

## 7. Post-catalytic studies

### 7.1. PXRD

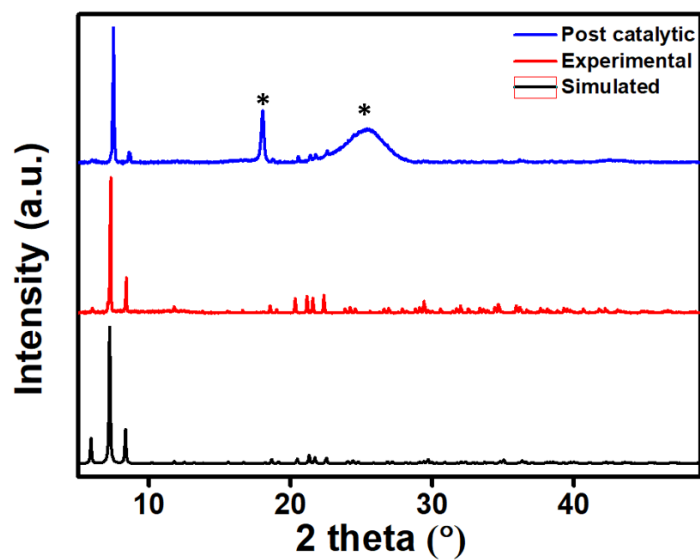

**Figure S32.** The powder pattern of Ag<sub>12</sub>-pyz CAM (blue solid line) on the carbon cloth (post-catalysis) matches well with the simulated (black) and experimental pattern (red). (\*) The broad peak corresponds to the diffraction peaks from the sample holder (Bruker D8 advance) made of polymethyl methacrylate (PMMA) and the carbon cloth coated with PTFE.



## 7.2. Scanning Electron Microscope (SEM) and Energy Dispersive X-ray Spectroscopy (EDS)

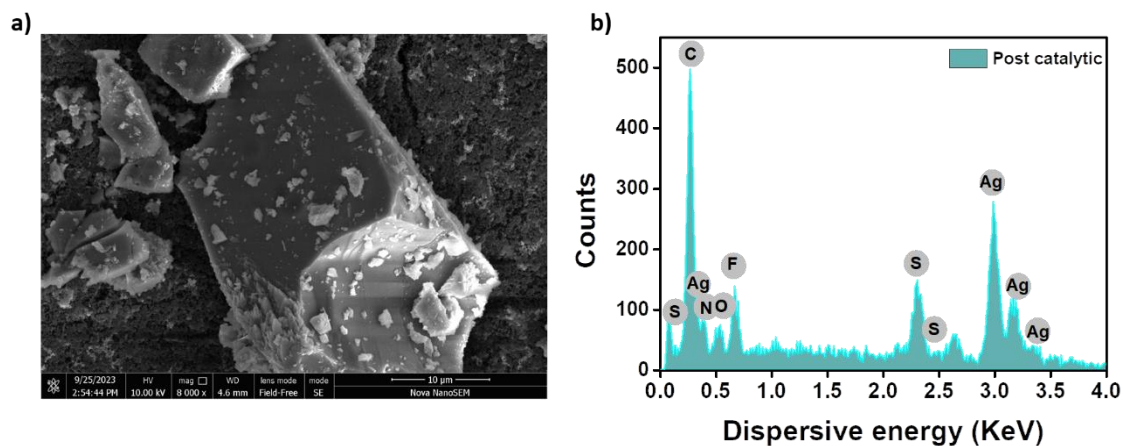

**Figure S33.** a) The post-catalysis morphology of Ag<sub>12</sub>-pyz by SEM (broken block-like morphology), b) EDS elemental mapping affirming the presence of all the elements intact.

## 7.3. X-ray Photoelectron Spectroscopy (XPS)

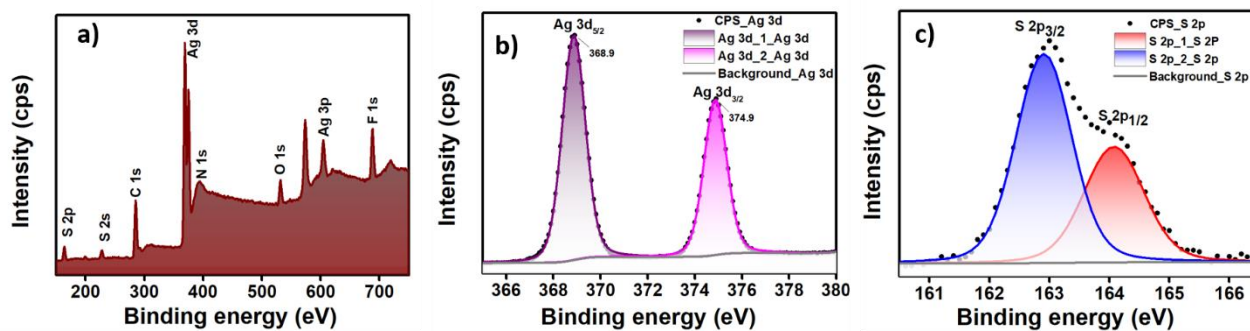

**Figure S34.** a) XPS survey spectrum, (b) deconvolution spectra of Ag, and (c) S elements, after the catalytic experiments.



## 8. TD-DFT of Cluster Mode

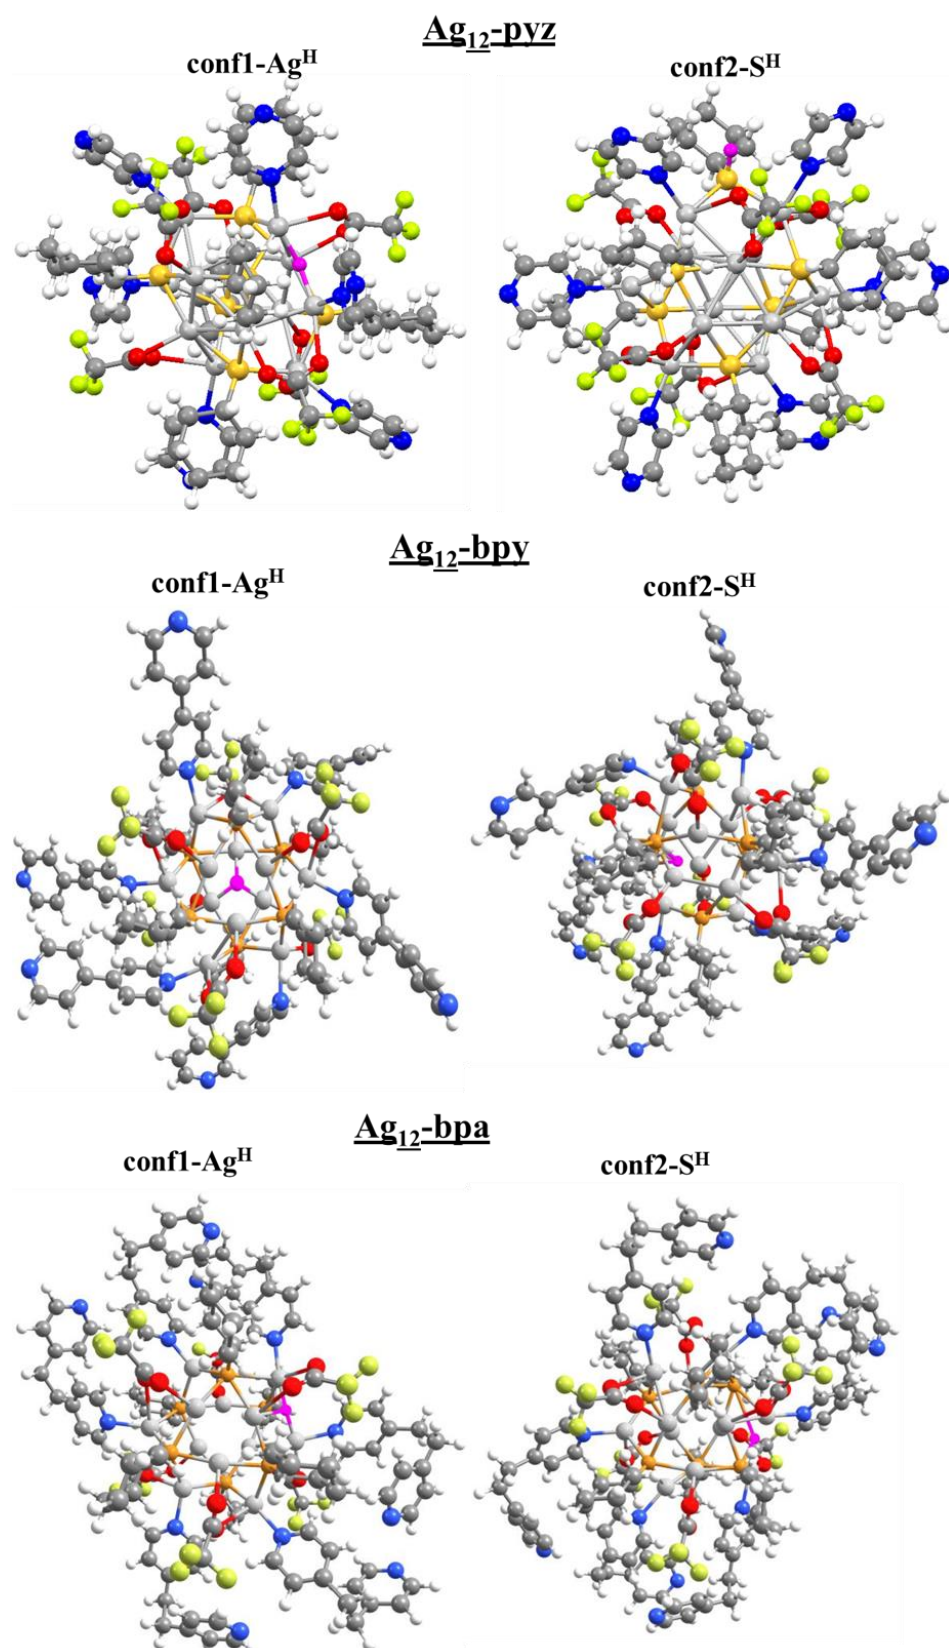

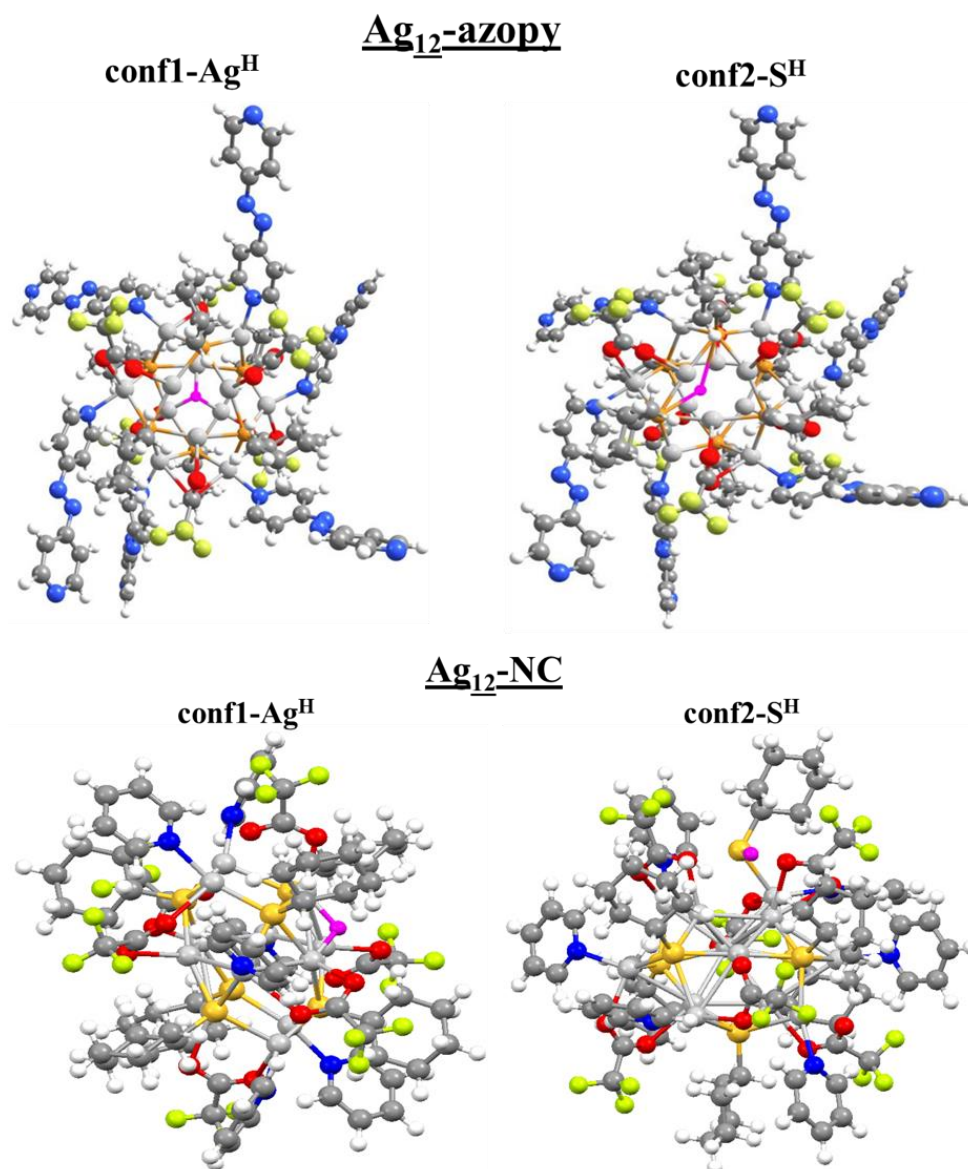

**Figure S35.** Optimized geometries of hydrogen adsorbed conformer structure of, in the order Ag<sub>12</sub>-pyz, Ag<sub>12</sub>-bpy, Ag<sub>12</sub>-bpa, Ag<sub>12</sub>azopy, Ag<sub>12</sub>py, respectively. color code: Ag, light Grey; S, yellow; O, red; N, blue; C, grey; F, greenish yellow.

Theoretical bond lengths: Average Ag-Ag bond lengths are 3.131 Å (py), 3.134 Å (bpy), 3.251 Å (bpa), and 3.383 Å (azopy), whereas it decreases to 2.893 Å in the Pyrazine-based cluster.

### 8.1. Hydrogen adsorption free energy ( $\Delta G_H$ ) calculations

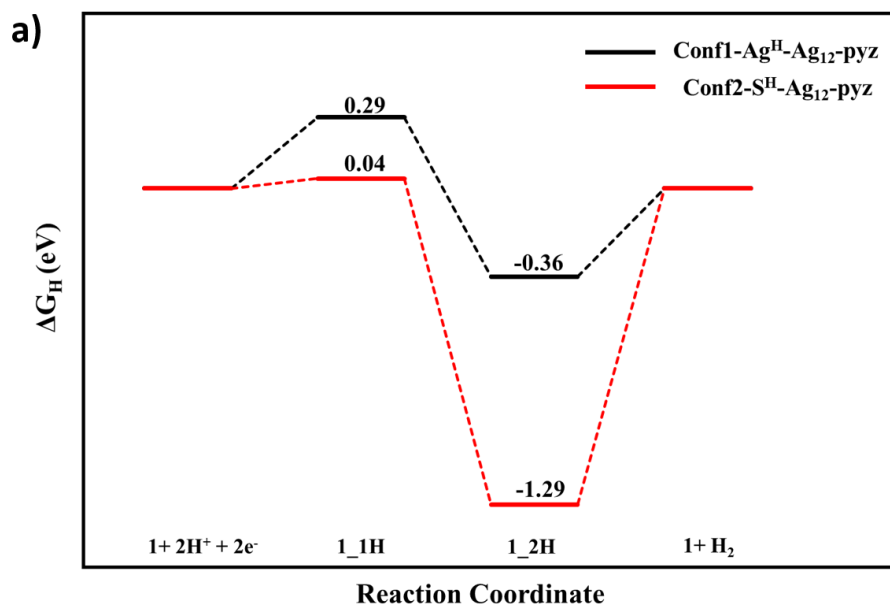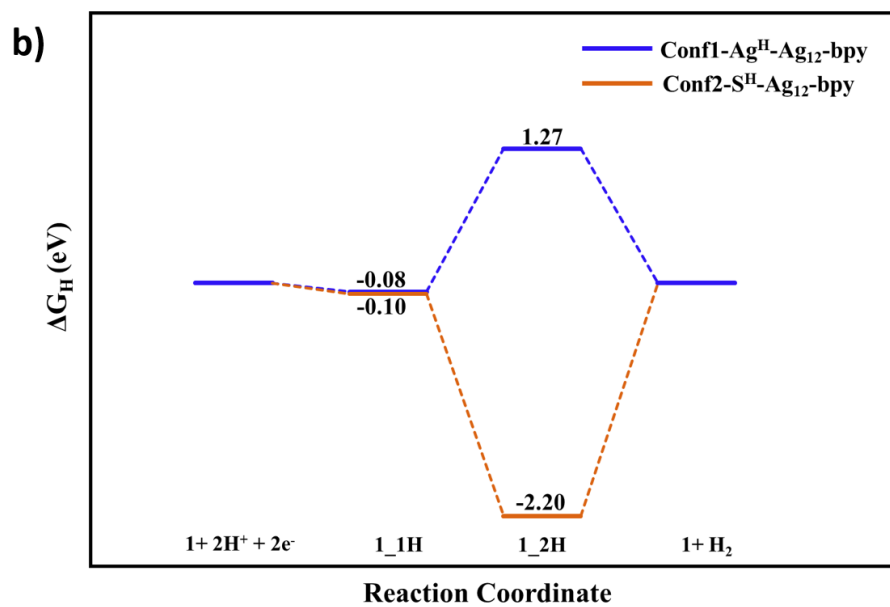

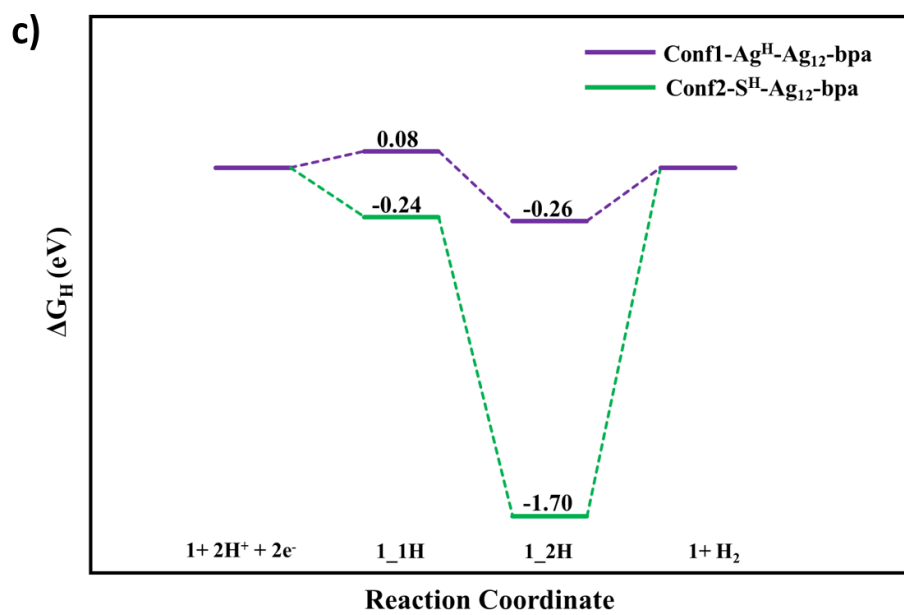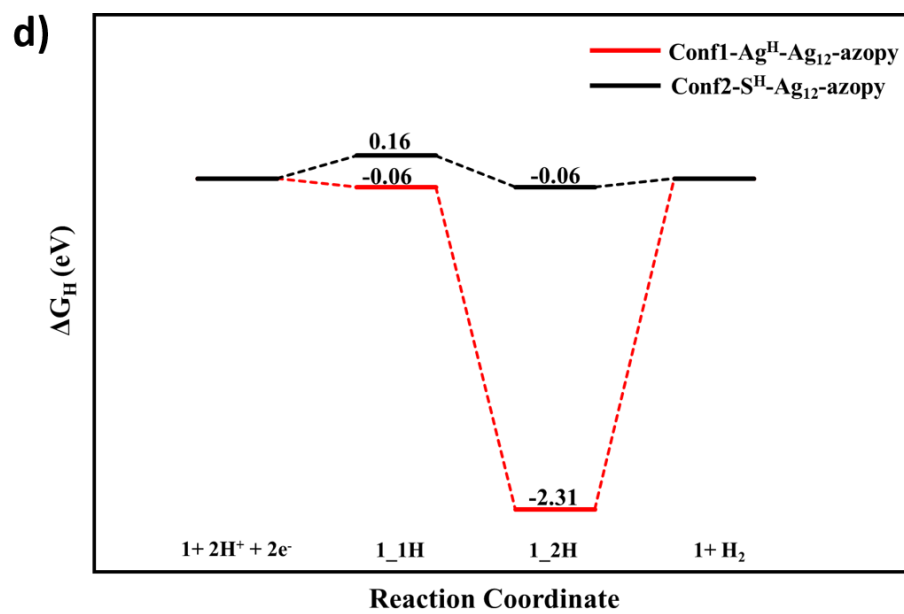

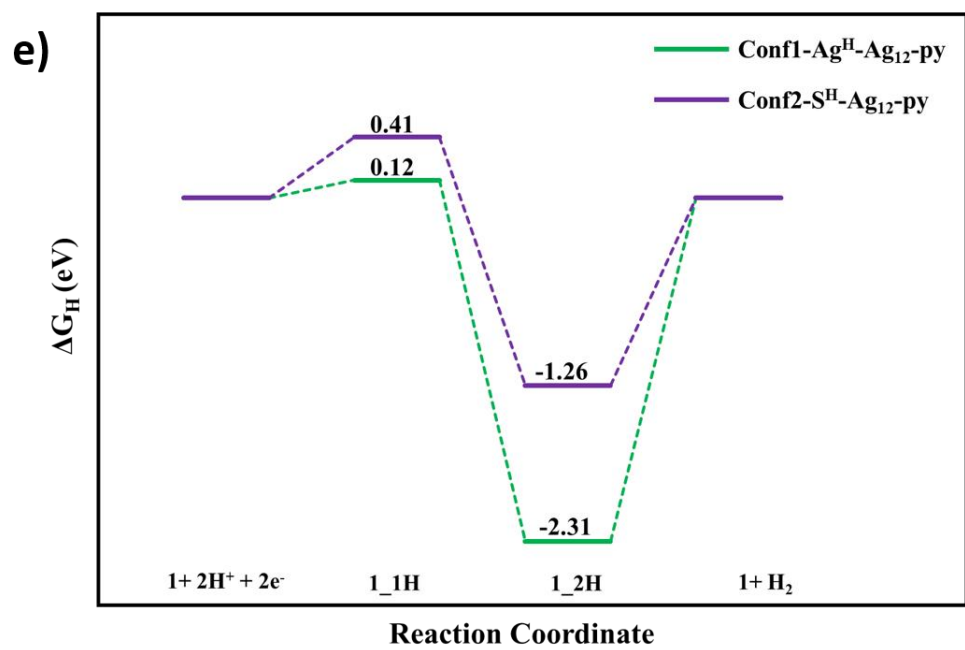

**Figure S36.** Calculated free energy profile of HER reaction, a) Ag<sub>12</sub>-pyz, b) Ag<sub>12</sub>-bpy, c) Ag<sub>12</sub>-bpa, d) Ag<sub>12</sub>-azopy, e) Ag<sub>12</sub>-py.

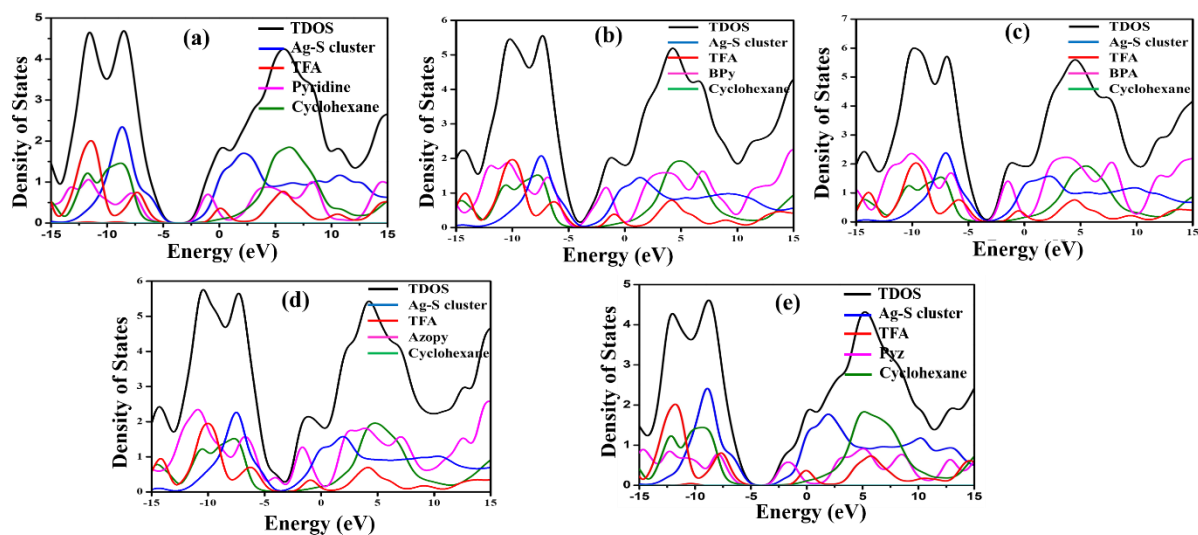

**Figure S37.** Density of states spectra of (a) Ag<sub>12</sub>-py, (b) Ag<sub>12</sub>-bpy (c) Ag<sub>12</sub>-bpa, (d) Ag<sub>12</sub>-azopy, (e) Ag<sub>12</sub>-pyz clusters. Color code: Ag, blue; S, yellow; O, green; N, blue; C, grey; F, pink.

**Table S7.** Calculated band-gap (in eV) of the studied cluster assembly.

| Cluster-assembly | Ag <sub>12</sub> -pyz | Ag <sub>12</sub> -azopy | Ag <sub>12</sub> -bpa | Ag <sub>12</sub> -py | Ag <sub>12</sub> -bpy |
|------------------|-----------------------|-------------------------|-----------------------|----------------------|-----------------------|
| Band gap (eV)    | 2.01                  | 2.18                    | 2.23                  | 2.24                 | 2.28                  |

## 9. $I$ - $V$ characteristics of $\text{Ag}_{12}$ -pyz

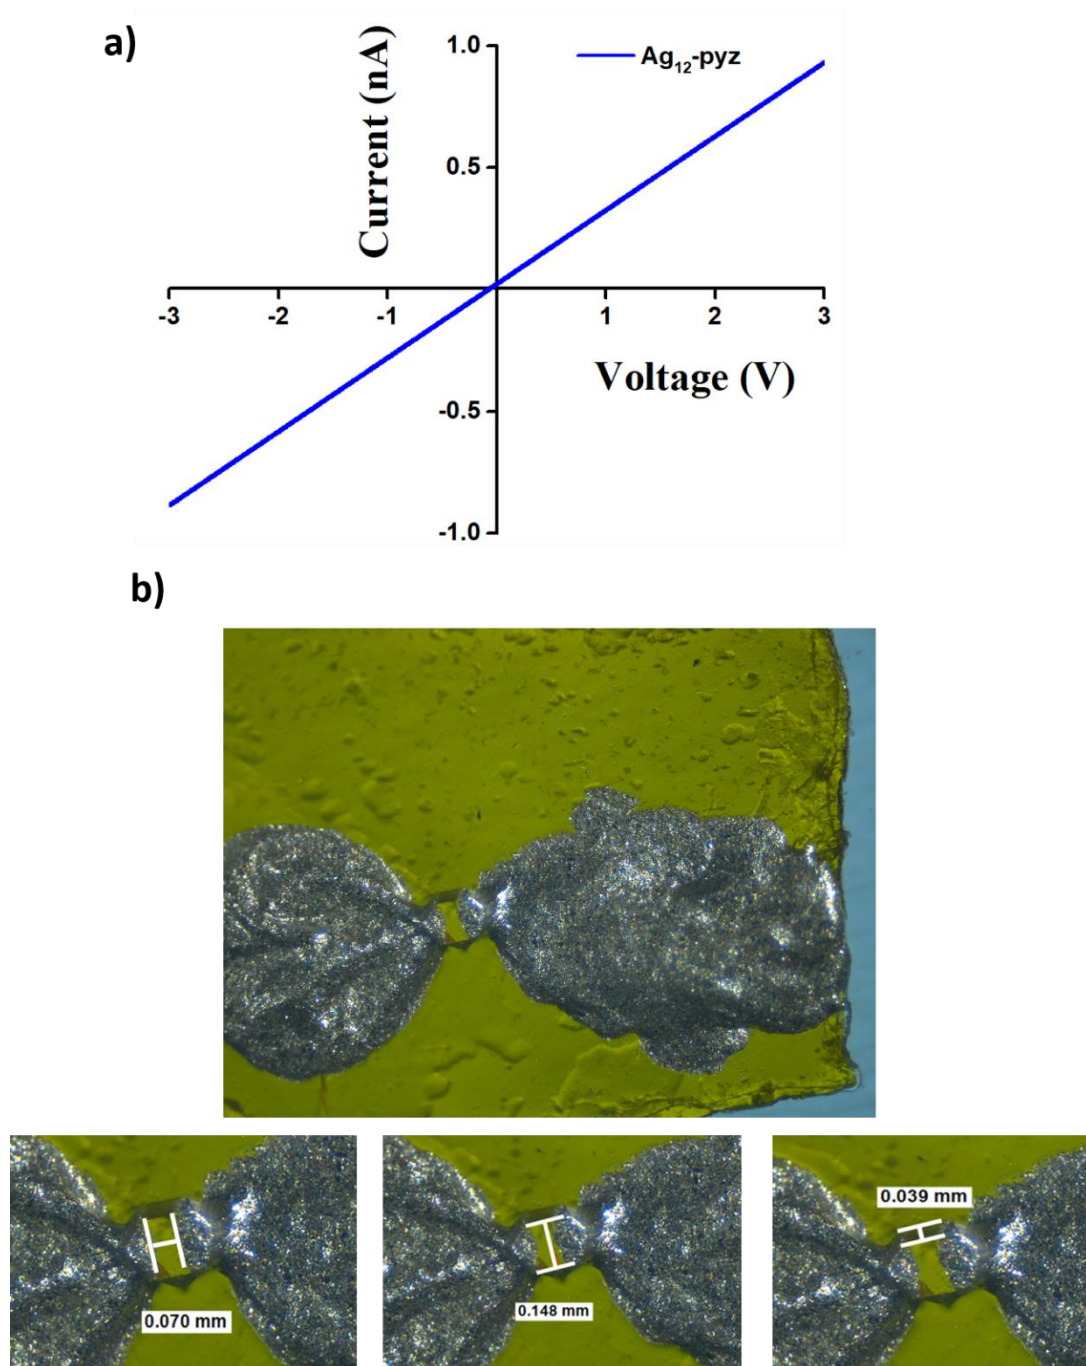

**Figure S38.** a) Current–voltage ( $I$ - $V$ ) plot of  $\text{Ag}_{12}$ -pyz single crystal.  $R=0.3\text{ G}\Omega$ ,  $\rho=2.4\times 10^5\text{ m}\Omega$ ,  $\sigma=1/\rho=4.1\times 10^{-6}\text{ S m}^{-1}$ . b) Optical microscope image of the single crystal mounted in-between silver paint followed by  $L\times B\times H$  values.



**10.** Table S8: Comparison table of other catalysts reported in the literature.

| Sl. No. | Catalyst                                                                                                                                                                                         | Electrolyte                          | Overpotential (mV) | Tafel slope (mV dec <sup>-1</sup> ) | Adsorption site        | Reference                                                  |
|---------|--------------------------------------------------------------------------------------------------------------------------------------------------------------------------------------------------|--------------------------------------|--------------------|-------------------------------------|------------------------|------------------------------------------------------------|
| 01      | Ag <sub>29</sub> (BDT) <sub>12</sub> (TPP) <sub>4</sub>                                                                                                                                          | 0.5 M H <sub>2</sub> SO <sub>4</sub> | 423                | 225                                 | Hollow site            | <i>Nanoscale</i> , <b>2023</b> , 15, 14941-14948.          |
| 02      | Pt <sub>1</sub> Ag <sub>28</sub> (BDT) <sub>12</sub> (TPP) <sub>4</sub>                                                                                                                          | 0.5 M H <sub>2</sub> SO <sub>4</sub> | 362                | 191                                 | Hollow site            | <i>Nanoscale</i> , <b>2023</b> , 15, 14941-14948.          |
| 03      | Pt <sub>1</sub> Ag <sub>28</sub> (BTT) <sub>12</sub> (TPP) <sub>2</sub>                                                                                                                          | 0.5 M H <sub>2</sub> SO <sub>4</sub> | 348                | 144                                 | Hollow site            | <i>Nanoscale</i> , <b>2023</b> , 15, 14941-14948.          |
| 04      | Ag NCs/MoS <sub>2</sub>                                                                                                                                                                          | 0.5 M H <sub>2</sub> SO <sub>4</sub> | 230                | 106                                 | -                      | <i>ACS Appl. Nano Mater.</i> <b>2022</b> , 5, 7132-7141.   |
| 05      | Ag <sub>25</sub> (SPhMe <sub>2</sub> ) <sub>18</sub>                                                                                                                                             | 1.0 M KOH                            | 420                | 125                                 | -                      | <i>Bull. Korean Chem. Soc.</i> <b>2021</b> , 42, 1672–1677 |
| 06      | NiAg <sub>24</sub> (SPhMe <sub>2</sub> ) <sub>18</sub>                                                                                                                                           | 1.0 M KOH                            | 270                | 58                                  | -                      | <i>Bull. Korean Chem. Soc.</i> <b>2021</b> , 42, 1672–1677 |
| 07      | Au <sub>36</sub> Ag <sub>2</sub> (SR)                                                                                                                                                            | 0.5 M H <sub>2</sub> SO <sub>4</sub> | ~252               | 125                                 | kernel's shell Au atom | <i>J. Am. Chem. Soc.</i> <b>2021</b> , 143, 11102-11108    |
| 08      | Au <sub>15</sub> Ag <sub>23</sub> ( <sup>t</sup> BuC≡C) <sub>18</sub> Br <sub>6</sub>                                                                                                            | 0.5 M H <sub>2</sub> SO <sub>4</sub> | 125                | 121                                 | -                      | <i>Int. J. Hydrogen Energy.</i> <b>2024</b> , 53, 300-307. |
| 09      | Au <sub>24</sub> Ag <sub>20</sub> ( <sup>t</sup> BuPh-C≡C) <sub>24</sub> Cl <sub>2</sub>                                                                                                         | 0.5 M H <sub>2</sub> SO <sub>4</sub> | 262                | 96                                  | Staple Au atom         | <i>Dalton Trans.</i> <b>2022</b> , 51, 7845-7850.          |
| 10      | Au <sub>22</sub> Ag <sub>22</sub> ( <sup>t</sup> BuC≡C) <sub>16</sub> Br <sub>3.28</sub> Cl <sub>2.72</sub>                                                                                      | 0.5 M H <sub>2</sub> SO <sub>4</sub> | 335                | 117                                 | Staple Au atom         | <i>Dalton Trans.</i> <b>2022</b> , 51, 7845-7850.          |
| 11      | Au <sub>9</sub> Ag <sub>9</sub> (C≡CAr <sup>F</sup> ) <sub>18</sub>                                                                                                                              | 0.5 M H <sub>2</sub> SO <sub>4</sub> | 274                | 99                                  | -                      | <i>Eur. J. Inorg. Chem.</i> <b>2022</b> , 2022, e202200176 |
| 12      | Ag <sub>12</sub> -py: {[Ag <sub>12</sub> (C <sub>6</sub> H <sub>11</sub> S) <sub>6</sub> (CF <sub>3</sub> COO) <sub>6</sub> (C <sub>5</sub> H <sub>5</sub> N) <sub>6</sub> ]. 4H <sub>2</sub> O} | 0.5 M H <sub>2</sub> SO <sub>4</sub> | 230                | 178                                 | Ag site                | <b>This work</b>                                           |



|    |                                                                                                                                                                                                                        |                                          |            |            |               |                  |
|----|------------------------------------------------------------------------------------------------------------------------------------------------------------------------------------------------------------------------|------------------------------------------|------------|------------|---------------|------------------|
| 13 | Ag <sub>12</sub> -bpy:<br>[Ag <sub>12</sub> (C <sub>6</sub> H <sub>11</sub> S) <sub>6</sub> (CF <sub>3</sub> COO) <sub>6</sub><br>(C <sub>10</sub> H <sub>8</sub> N <sub>2</sub> ) <sub>3</sub> ]                      | 0.5 M H <sub>2</sub> SO <sub>4</sub>     | 575        | 242        | Ag site       | <b>This work</b> |
| 14 | Ag <sub>12</sub> -bpa:<br>[Ag <sub>12</sub> (C <sub>6</sub> H <sub>11</sub> S) <sub>6</sub> (CF <sub>3</sub> COO) <sub>6</sub><br>(C <sub>12</sub> H <sub>12</sub> N <sub>2</sub> ) <sub>3</sub> (DMF) <sub>2</sub> ]  | 0.5 M H <sub>2</sub> SO <sub>4</sub>     | 401        | 235        | Ag site       | <b>This work</b> |
| 15 | Ag <sub>12</sub> -azopy:<br>[Ag <sub>12</sub> (C <sub>6</sub> H <sub>11</sub> S) <sub>6</sub> (CF <sub>3</sub> COO) <sub>6</sub><br>(C <sub>10</sub> H <sub>8</sub> N <sub>4</sub> ) <sub>3</sub> (DMF) <sub>2</sub> ] | 0.5 M H <sub>2</sub> SO <sub>4</sub>     | 205        | 163        | Ag site       | <b>This work</b> |
| 16 | <b>Ag<sub>12</sub>-pyz:</b><br><b>[Ag<sub>12</sub>(C<sub>6</sub>H<sub>11</sub>S)<sub>6</sub>(CF<sub>3</sub>COO)<sub>6</sub><br/>(C<sub>4</sub>H<sub>4</sub>N<sub>2</sub>)<sub>3</sub>]</b>                             | <b>0.5 M H<sub>2</sub>SO<sub>4</sub></b> | <b>122</b> | <b>117</b> | <b>S site</b> | <b>This work</b> |

## 11. References

1. D. Kratzert, J. J. Holstein, I. Krossing, *J. Appl. Crystallogr.* **2015**, *48*, 933-938.
2. K. Momma, F. Izumi, *J. Appl. Crystallogr.*, **2011**, *44*, 1272-1276.
3. L. Krause, R. Herbst-Irmer, G. M. Sheldrick and D. Stalke, *J. Appl. Crystallogr.* **2015**, *48*, 3–10.
4. G. M. Sheldrick, *Acta Crystallogr., C. Struct. Chem.*, **2015**, *71*, 3-8.
5. A. Lausi, M. Polentarutti, S. Onesti, J. Plaisier, E. Busetto, G. Bais, L. Barba, A. Cassetta, G. Campi and D. Lamba, *Eur. Phys. J. Plus*, **2015**, *130*, 1-8.
6. W. Kabsch, *Acta Crystallogr. Sec. D: Bio. Crystallogr.*, **2010**, *66*, 125-132.
7. G. M. Sheldrick, *Acta Crystallogr. Sect. C: Struc. Chem.*, **2015**, *71*, 3-8.
8. G. M. Sheldrick, *Acta Crystallogr., Sect. A: Found. Adv.*, **2015**, *71*, 3-8.
9. O. V. Dolomanov, L. J. Bourhis, R. J. Gildea, J. A. Howard, H. Puschmann, *J. Appl. Crystallogr.*, **2009**, *42*, 339-341.
10. A. L. Spek, *Acta Crystallographica Section C: Structural Chemistry* **2015**, *71*, 9-18.
11. Frisch, M. J.; Trucks, G. W.; Schlegel, H. B.; Scuseria, G. E.; Robb, M. A.; Cheeseman, J. R.; Scalmani, G.; Barone, V.; Petersson, G. A.; Nakatsuji, H.; Li, X.; Caricato, M.; Marenich, A. V.; Bloino, J.; Janesko, B. G.; Gomperts, R.; Mennucci, B.; Hratchian, H. P.; Ortiz, J. V.; Izmaylov, A. F.; Sonnenberg, J. L.; Williams-Young, D.; Ding, F.; Lipparini, F.; Egidi, F.; Goings, J.; Peng, B.; Petrone, A.; Henderson, T.; Ranasinghe, D.; Zakrzewski, V. G.; Gao, J.; Rega, N.; Zheng, G.; Liang, W.; Hada, M.; Ehara, M.; Toyota, K.; Fukuda, R.; Hasegawa, J.; Ishida, M.; Nakajima, T.; Honda, Y.; Kitao, O.; Nakai, H.; Vreven, T.; Throssell, K.; Montgomery, J. A., Jr.; Peralta, J. E.; Ogliaro, F.; Bearpark, M. J.; Heyd, J. J.; Brothers, E. N.; Kudin, K. N.; Staroverov, V. N.; Keith, T. A.; Kobayashi, R.; Normand, J.; Raghavachari, K.; Rendell, A. P.; Burant, J. C.; Iyengar, S. S.; Tomasi, J.; Cossi, M.; Millam, J. M.; Klene, M.; Adamo, C.; Cammi, R.; Ochterski, J. W.; Martin, R. L.; Morokuma, K.; Farkas, Ö.; Foresman, J. B.; Fox, D. J. *Gaussian 16, Revision C.01*, Gaussian, Inc., Wallingford CT, **2016**.
12. J. P. Perdew, M. Ernzerhof, K. Burke, *J. Chem. Phys.* **1996**, *105*, 9982-9985.
13. V. A. Rassolov, J. A. Pople, M. A. Ratner and T. L. Windus, *J. Chem. Phys.*, **1998**, *109*, 1223–1229.
14. Chandrashekar, P.; Sardar, G.; Sengupta, T.; Reber, A. C.; Mondal, P. K.; Kabra, D.; Khanna, S. N.; Deria, P.; Mandal, S. Modulation of Singlet-Triplet Gap in Atomically Precise Silver Cluster-Assembled Material. *Angew. Chemie - Int. Ed.* **2024**, *63* (6). <https://doi.org/10.1002/anie.202317345>.

## 12. Optimized coordinates

### Ag<sub>12</sub>-pYZ:

|    |                 |                 |                 |
|----|-----------------|-----------------|-----------------|
| Ag | 12.474960000000 | 10.321545000000 | 12.241802000000 |
| Ag | 11.178446000000 | 7.705959000000  | 13.026447000000 |
| Ag | 12.241818000000 | 12.474961000000 | 10.321521000000 |
| Ag | 10.321544000000 | 12.241825000000 | 12.474943000000 |
| Ag | 8.023564000000  | 9.871577000000  | 13.344056000000 |
| Ag | 13.026440000000 | 11.178437000000 | 7.705933000000  |
| Ag | 13.344049000000 | 8.023558000000  | 9.871553000000  |
| Ag | 7.705951000000  | 13.026456000000 | 11.178436000000 |
| Ag | 9.871557000000  | 13.344056000000 | 8.023542000000  |
| Ag | 8.575041000000  | 10.728470000000 | 8.808186000000  |
| Ag | 8.808185000000  | 8.575054000000  | 10.728468000000 |
| Ag | 10.728457000000 | 8.808190000000  | 8.575045000000  |
| C  | 10.412100000000 | 5.312385000000  | 16.784681000000 |
| C  | 12.671331000000 | 5.245990000000  | 16.502202000000 |
| C  | 10.263384000000 | 5.984584000000  | 15.563323000000 |
| C  | 12.552576000000 | 5.913747000000  | 15.275492000000 |
| C  | 14.642460000000 | 8.429998000000  | 13.232797000000 |
| C  | 16.064778000000 | 7.871715000000  | 13.537638000000 |
| C  | 10.907588000000 | 10.402841000000 | 15.521935000000 |
| C  | 9.872364000000  | 9.685474000000  | 16.397776000000 |
| C  | 12.338721000000 | 9.966629000000  | 15.846498000000 |
| C  | 10.184062000000 | 9.902750000000  | 17.890003000000 |
| C  | 11.614122000000 | 9.454339000000  | 18.230466000000 |
| C  | 12.639950000000 | 10.176683000000 | 17.342965000000 |
| C  | 16.784670000000 | 10.412068000000 | 5.312367000000  |
| C  | 16.502192000000 | 12.671298000000 | 5.245949000000  |
| C  | 15.563312000000 | 10.263359000000 | 5.984565000000  |
| C  | 15.275482000000 | 12.552550000000 | 5.913707000000  |
| C  | 13.232818000000 | 14.642454000000 | 8.429964000000  |
| C  | 13.537686000000 | 16.064765000000 | 7.871675000000  |
| C  | 15.521944000000 | 10.907586000000 | 10.402784000000 |
| C  | 16.397777000000 | 9.872473000000  | 9.685246000000  |
| C  | 15.846449000000 | 12.338779000000 | 9.966726000000  |
| C  | 17.890006000000 | 10.184183000000 | 9.902492000000  |
| C  | 18.230413000000 | 11.614307000000 | 9.454240000000  |
| C  | 17.342918000000 | 12.640023000000 | 10.176748000000 |
| C  | 5.312399000000  | 16.784698000000 | 10.412071000000 |
| C  | 5.245985000000  | 16.502218000000 | 12.671302000000 |
| C  | 5.984592000000  | 15.563337000000 | 10.263359000000 |
| C  | 5.913739000000  | 15.275506000000 | 12.552550000000 |
| C  | 8.430000000000  | 13.232818000000 | 14.642437000000 |
| C  | 7.871720000000  | 13.537618000000 | 16.064764000000 |
| C  | 10.402804000000 | 15.521950000000 | 10.907574000000 |
| C  | 9.685181000000  | 16.397787000000 | 9.872523000000  |
| C  | 9.966831000000  | 15.846426000000 | 12.338800000000 |
| C  | 9.902423000000  | 17.890015000000 | 10.184240000000 |
| C  | 9.454260000000  | 18.230393000000 | 11.614399000000 |
| C  | 10.176849000000 | 17.342893000000 | 12.640054000000 |
| C  | 10.637916000000 | 15.737621000000 | 4.265304000000  |
| C  | 8.378685000000  | 15.804024000000 | 4.547781000000  |
| C  | 10.786629000000 | 15.065425000000 | 5.486663000000  |
| C  | 8.497438000000  | 15.136268000000 | 5.774492000000  |
| C  | 6.407544000000  | 12.620021000000 | 7.817183000000  |
| C  | 4.985235000000  | 13.178312000000 | 7.512311000000  |
| C  | 10.142411000000 | 10.647180000000 | 5.528054000000  |
| C  | 11.177594000000 | 11.364606000000 | 4.652213000000  |
| C  | 8.711256000000  | 11.083338000000 | 5.203512000000  |

|   |                 |                 |                 |
|---|-----------------|-----------------|-----------------|
| C | 10.865890000000 | 11.147338000000 | 3.159986000000  |
| C | 9.435807000000  | 11.595692000000 | 2.819544000000  |
| C | 8.410020000000  | 10.873292000000 | 3.707046000000  |
| C | 4.265327000000  | 10.637939000000 | 15.737607000000 |
| C | 4.547817000000  | 8.378711000000  | 15.804042000000 |
| C | 5.486687000000  | 10.786650000000 | 15.065412000000 |
| C | 5.774528000000  | 8.497461000000  | 15.136286000000 |
| C | 7.817192000000  | 6.407560000000  | 12.620024000000 |
| C | 7.512348000000  | 4.985243000000  | 13.178309000000 |
| C | 5.528058000000  | 10.142419000000 | 10.647216000000 |
| C | 4.652223000000  | 11.177452000000 | 11.364867000000 |
| C | 5.203596000000  | 8.711184000000  | 11.083169000000 |
| C | 3.159995000000  | 10.865730000000 | 11.147636000000 |
| C | 2.819631000000  | 9.435561000000  | 11.595778000000 |
| C | 3.707129000000  | 8.409924000000  | 10.873162000000 |
| C | 15.737612000000 | 4.265322000000  | 10.637911000000 |
| C | 15.804012000000 | 4.547795000000  | 8.378680000000  |
| C | 15.065418000000 | 5.486682000000  | 10.786624000000 |
| C | 15.136258000000 | 5.774507000000  | 8.497432000000  |
| C | 12.619999000000 | 7.817193000000  | 6.407546000000  |
| C | 13.178276000000 | 7.512373000000  | 4.985222000000  |
| C | 10.647190000000 | 5.528064000000  | 10.142422000000 |
| C | 11.364725000000 | 4.652229000000  | 11.177535000000 |
| C | 11.083245000000 | 5.203555000000  | 8.711229000000  |
| C | 11.147472000000 | 3.160001000000  | 10.865828000000 |
| C | 11.595721000000 | 2.819590000000  | 9.435704000000  |
| C | 10.873215000000 | 3.707087000000  | 8.409987000000  |
| H | 9.531479000000  | 5.071072000000  | 17.391896000000 |
| H | 13.658678000000 | 4.951258000000  | 16.877403000000 |
| H | 9.288648000000  | 6.292237000000  | 15.169134000000 |
| H | 13.417771000000 | 6.170867000000  | 14.654992000000 |
| H | 10.800845000000 | 11.496516000000 | 15.630275000000 |
| H | 9.894298000000  | 8.602858000000  | 16.166703000000 |
| H | 8.856511000000  | 10.045932000000 | 16.158186000000 |
| H | 13.064421000000 | 10.514383000000 | 15.221246000000 |
| H | 12.454168000000 | 8.893969000000  | 15.592884000000 |
| H | 10.062010000000 | 10.977062000000 | 18.130911000000 |
| H | 9.444309000000  | 9.355451000000  | 18.502840000000 |
| H | 11.700200000000 | 8.359365000000  | 18.072685000000 |
| H | 11.831264000000 | 9.638835000000  | 19.298136000000 |
| H | 13.665078000000 | 9.825758000000  | 17.561350000000 |
| H | 12.620910000000 | 11.261276000000 | 17.569594000000 |
| H | 17.391886000000 | 9.531445000000  | 5.071063000000  |
| H | 16.877396000000 | 13.658643000000 | 4.951210000000  |
| H | 15.169121000000 | 9.288627000000  | 6.292227000000  |
| H | 14.654985000000 | 13.417748000000 | 6.170824000000  |
| H | 15.630336000000 | 10.800718000000 | 11.496442000000 |
| H | 16.166654000000 | 9.894538000000  | 8.602643000000  |
| H | 16.158230000000 | 8.856570000000  | 10.045586000000 |
| H | 15.221201000000 | 13.064397000000 | 10.514594000000 |
| H | 15.592784000000 | 12.454345000000 | 8.894091000000  |
| H | 18.130967000000 | 10.062005000000 | 10.976778000000 |
| H | 18.502837000000 | 9.444511000000  | 9.355075000000  |
| H | 18.072581000000 | 11.700514000000 | 8.359284000000  |
| H | 19.298086000000 | 11.831454000000 | 9.638716000000  |
| H | 17.561258000000 | 13.665199000000 | 9.825937000000  |
| H | 17.569596000000 | 12.620858000000 | 11.261329000000 |
| H | 5.071093000000  | 17.391913000000 | 9.531448000000  |
| H | 4.951253000000  | 16.877424000000 | 13.658647000000 |
| H | 6.292247000000  | 15.169145000000 | 9.288624000000  |
| H | 6.170859000000  | 14.655007000000 | 13.417747000000 |

|   |                 |                 |                 |
|---|-----------------|-----------------|-----------------|
| H | 11.496454000000 | 15.630361000000 | 10.800639000000 |
| H | 8.602583000000  | 16.166646000000 | 9.894657000000  |
| H | 10.045457000000 | 16.158262000000 | 8.856592000000  |
| H | 10.514755000000 | 15.221174000000 | 13.064374000000 |
| H | 8.894207000000  | 15.592743000000 | 12.454429000000 |
| H | 10.976697000000 | 18.130994000000 | 10.061995000000 |
| H | 9.354948000000  | 18.502848000000 | 9.444614000000  |
| H | 8.359312000000  | 18.072543000000 | 11.700676000000 |
| H | 9.638734000000  | 19.298065000000 | 11.831550000000 |
| H | 9.826101000000  | 17.561212000000 | 13.665257000000 |
| H | 11.261425000000 | 17.569589000000 | 12.620823000000 |
| H | 11.518539000000 | 15.978932000000 | 3.658090000000  |
| H | 7.391339000000  | 16.098757000000 | 4.172577000000  |
| H | 11.761365000000 | 14.757770000000 | 5.880853000000  |
| H | 7.632242000000  | 14.879149000000 | 6.394990000000  |
| H | 10.249198000000 | 9.553511000000  | 5.419697000000  |
| H | 11.155615000000 | 12.447218000000 | 4.883302000000  |
| H | 12.193465000000 | 11.004189000000 | 4.891787000000  |
| H | 7.985586000000  | 10.535544000000 | 5.828766000000  |
| H | 8.595768000000  | 12.155989000000 | 5.457143000000  |
| H | 10.987986000000 | 10.073035000000 | 2.919061000000  |
| H | 11.605614000000 | 11.694677000000 | 2.547149000000  |
| H | 9.349683000000  | 12.690660000000 | 2.977341000000  |
| H | 9.218662000000  | 11.411201000000 | 1.751873000000  |
| H | 7.384874000000  | 11.224176000000 | 3.488678000000  |
| H | 8.429103000000  | 9.788703000000  | 3.480401000000  |
| H | 3.658107000000  | 11.518562000000 | 15.978906000000 |
| H | 4.172617000000  | 7.391366000000  | 16.098783000000 |
| H | 5.880876000000  | 11.761383000000 | 14.757746000000 |
| H | 6.395028000000  | 7.632264000000  | 14.879172000000 |
| H | 5.419634000000  | 10.249372000000 | 9.553569000000  |
| H | 4.883377000000  | 11.155300000000 | 12.447463000000 |
| H | 4.891738000000  | 12.193391000000 | 11.004607000000 |
| H | 5.828847000000  | 7.985623000000  | 10.535226000000 |
| H | 5.457291000000  | 8.595538000000  | 12.155787000000 |
| H | 2.919003000000  | 10.987992000000 | 10.073367000000 |
| H | 2.547164000000  | 11.605343000000 | 11.695131000000 |
| H | 2.977493000000  | 9.349266000000  | 12.690723000000 |
| H | 1.751957000000  | 9.218406000000  | 11.411312000000 |
| H | 3.488820000000  | 7.384714000000  | 11.223895000000 |
| H | 3.480421000000  | 8.429173000000  | 9.788589000000  |
| H | 15.978922000000 | 3.658107000000  | 11.518534000000 |
| H | 16.098742000000 | 4.172589000000  | 7.391334000000  |
| H | 14.757765000000 | 5.880875000000  | 11.761359000000 |
| H | 14.879137000000 | 6.395004000000  | 7.632235000000  |
| H | 9.553531000000  | 5.419678000000  | 10.249292000000 |
| H | 12.447330000000 | 4.883347000000  | 11.155468000000 |
| H | 11.004387000000 | 4.891779000000  | 12.193438000000 |
| H | 10.535379000000 | 5.828805000000  | 7.985610000000  |
| H | 12.155880000000 | 5.457215000000  | 8.595661000000  |
| H | 10.073185000000 | 2.919045000000  | 10.988007000000 |
| H | 11.694887000000 | 2.547169000000  | 11.605499000000 |
| H | 12.690678000000 | 2.977417000000  | 9.349495000000  |
| H | 11.411240000000 | 1.751918000000  | 9.218558000000  |
| H | 11.224024000000 | 3.488743000000  | 7.384811000000  |
| H | 9.788633000000  | 3.480414000000  | 8.429154000000  |
| N | 11.610129000000 | 4.941463000000  | 17.273742000000 |
| N | 11.341494000000 | 6.291908000000  | 14.808040000000 |
| N | 17.273732000000 | 11.610093000000 | 4.941433000000  |
| N | 14.808028000000 | 11.341472000000 | 6.291877000000  |
| N | 4.941470000000  | 17.273760000000 | 11.610097000000 |

|   |                 |                 |                 |
|---|-----------------|-----------------|-----------------|
| N | 6.291903000000  | 14.808051000000 | 11.341471000000 |
| N | 9.439889000000  | 16.108547000000 | 3.776241000000  |
| N | 9.708518000000  | 14.758105000000 | 6.241946000000  |
| N | 3.776271000000  | 9.439914000000  | 16.108549000000 |
| N | 6.241977000000  | 9.708540000000  | 14.758111000000 |
| N | 16.108535000000 | 3.776257000000  | 9.439884000000  |
| N | 14.758099000000 | 6.241964000000  | 9.708512000000  |
| S | 10.492406000000 | 10.065838000000 | 13.725417000000 |
| S | 13.725422000000 | 10.492401000000 | 10.065806000000 |
| S | 10.984177000000 | 7.324585000000  | 10.557604000000 |
| S | 10.065824000000 | 13.725430000000 | 10.492386000000 |
| S | 10.557596000000 | 10.984177000000 | 7.324572000000  |
| S | 7.324580000000  | 10.557612000000 | 10.984185000000 |
| O | 13.796049000000 | 7.557227000000  | 12.875139000000 |
| O | 14.522623000000 | 9.682698000000  | 13.325767000000 |
| O | 12.875145000000 | 13.796045000000 | 7.557196000000  |
| O | 13.325793000000 | 14.522617000000 | 9.682664000000  |
| O | 7.557228000000  | 12.875159000000 | 13.796025000000 |
| O | 9.682700000000  | 13.325791000000 | 14.522600000000 |
| O | 7.253958000000  | 13.492790000000 | 8.174844000000  |
| O | 6.527379000000  | 11.367321000000 | 7.724217000000  |
| O | 8.174865000000  | 7.253968000000  | 13.492793000000 |
| O | 7.724214000000  | 6.527398000000  | 11.367325000000 |
| O | 13.492772000000 | 8.174854000000  | 7.253954000000  |
| O | 11.367299000000 | 7.724221000000  | 6.527386000000  |
| F | 16.759106000000 | 8.632426000000  | 14.408888000000 |
| F | 16.786374000000 | 7.808363000000  | 12.370727000000 |
| F | 16.012004000000 | 6.603317000000  | 14.041058000000 |
| F | 14.408917000000 | 16.759095000000 | 8.632406000000  |
| F | 12.370783000000 | 16.786370000000 | 7.808276000000  |
| F | 14.041146000000 | 16.011974000000 | 6.603294000000  |
| F | 8.632372000000  | 14.408935000000 | 16.759074000000 |
| F | 7.808489000000  | 12.370701000000 | 16.786362000000 |
| F | 6.603277000000  | 14.040925000000 | 16.012012000000 |
| F | 4.290899000000  | 12.417569000000 | 6.641095000000  |
| F | 4.263633000000  | 13.241734000000 | 8.679215000000  |
| F | 5.038029000000  | 14.446684000000 | 7.008830000000  |
| F | 6.641086000000  | 4.290921000000  | 12.417605000000 |
| F | 8.679256000000  | 4.263640000000  | 13.241647000000 |
| F | 7.008942000000  | 5.038018000000  | 14.446712000000 |
| F | 12.417605000000 | 6.641072000000  | 4.290913000000  |
| F | 13.241540000000 | 8.679284000000  | 4.263618000000  |
| F | 14.446706000000 | 7.009035000000  | 5.037979000000  |

Ag12-py:

|   |                |                |                 |
|---|----------------|----------------|-----------------|
| C | 3.069945000000 | 2.342416000000 | -3.082121000000 |
| H | 4.017740000000 | 1.772867000000 | -3.049837000000 |
| C | 2.291008000000 | 1.958006000000 | -4.344429000000 |
| H | 1.293310000000 | 2.433849000000 | -4.314418000000 |
| H | 2.150422000000 | 0.862939000000 | -4.372935000000 |
| C | 3.053040000000 | 2.430456000000 | -5.598132000000 |
| H | 4.008365000000 | 1.872910000000 | -5.678262000000 |
| H | 2.463435000000 | 2.179093000000 | -6.498631000000 |
| C | 3.340290000000 | 3.940082000000 | -5.544634000000 |
| H | 3.903970000000 | 4.256885000000 | -6.441375000000 |
| H | 2.380828000000 | 4.493367000000 | -5.553627000000 |
| C | 4.116258000000 | 4.307824000000 | -4.269610000000 |
| H | 4.285520000000 | 5.399172000000 | -4.215242000000 |
| H | 5.116937000000 | 3.829500000000 | -4.290027000000 |
| C | 3.361103000000 | 3.845749000000 | -3.008984000000 |

|    |                 |                 |                 |
|----|-----------------|-----------------|-----------------|
| H  | 3.944019000000  | 4.076236000000  | -2.099047000000 |
| H  | 2.405736000000  | 4.397690000000  | -2.929075000000 |
| C  | 0.698823000000  | -3.875401000000 | -3.073077000000 |
| H  | -0.252919000000 | -4.439178000000 | -3.063359000000 |
| C  | 0.776173000000  | -3.030963000000 | -4.349596000000 |
| H  | 1.666030000000  | -2.376394000000 | -4.297125000000 |
| H  | -0.120148000000 | -2.389634000000 | -4.423359000000 |
| C  | 1.879861000000  | -4.843552000000 | -2.936370000000 |
| H  | 1.768852000000  | -5.450172000000 | -2.019475000000 |
| H  | 2.815392000000  | -4.263734000000 | -2.827910000000 |
| C  | 4.360097000000  | -1.653472000000 | -2.708253000000 |
| C  | 5.362127000000  | -2.598916000000 | -3.435473000000 |
| C  | -0.705098000000 | 4.427591000000  | -2.845311000000 |
| C  | -3.516465000000 | -2.917334000000 | -2.812650000000 |
| C  | -4.841792000000 | -3.201427000000 | -3.580568000000 |
| C  | 0.401839000000  | 6.557818000000  | 0.407219000000  |
| H  | -0.258208000000 | 6.179023000000  | -0.381588000000 |
| C  | 0.144965000000  | 7.753623000000  | 1.089209000000  |
| H  | -0.740146000000 | 8.341865000000  | 0.829296000000  |
| C  | 1.024233000000  | 8.165417000000  | 2.099648000000  |
| H  | 0.842240000000  | 9.090021000000  | 2.657028000000  |
| C  | 2.143678000000  | 7.369646000000  | 2.380677000000  |
| H  | 2.862537000000  | 7.648281000000  | 3.156788000000  |
| C  | 2.334706000000  | 6.189192000000  | 1.653452000000  |
| H  | 3.184956000000  | 5.526949000000  | 1.842810000000  |
| C  | 4.118396000000  | -5.071587000000 | 1.841944000000  |
| H  | 3.097789000000  | -5.422924000000 | 2.020506000000  |
| C  | 5.203607000000  | -5.550649000000 | 2.584702000000  |
| H  | 5.035164000000  | -6.297640000000 | 3.365990000000  |
| C  | 6.485293000000  | -5.053397000000 | 2.310577000000  |
| H  | 7.353336000000  | -5.402758000000 | 2.879032000000  |
| C  | 6.631884000000  | -4.102138000000 | 1.292240000000  |
| H  | 7.611389000000  | -3.686935000000 | 1.036972000000  |
| C  | 5.497004000000  | -3.667870000000 | 0.596198000000  |
| H  | 5.548487000000  | -2.916708000000 | -0.200045000000 |
| C  | 6.582425000000  | 0.993787000000  | -1.603151000000 |
| H  | 6.398076000000  | -0.072711000000 | -1.760573000000 |
| C  | 7.539551000000  | 1.693368000000  | -2.346658000000 |
| H  | 8.125546000000  | 1.164569000000  | -3.104048000000 |
| C  | 6.936682000000  | 3.676743000000  | -1.117094000000 |
| H  | 7.040821000000  | 4.741511000000  | -0.888398000000 |
| C  | 5.996118000000  | 2.911266000000  | -0.417098000000 |
| H  | 5.347431000000  | 3.340538000000  | 0.354848000000  |
| C  | 7.717673000000  | 3.062696000000  | -2.105313000000 |
| H  | 8.452784000000  | 3.639493000000  | -2.675900000000 |
| C  | 0.882068000000  | -3.948201000000 | -5.583776000000 |
| H  | -0.056267000000 | -4.529614000000 | -5.690738000000 |
| H  | 0.974364000000  | -3.326237000000 | -6.492793000000 |
| C  | 2.074018000000  | -4.912268000000 | -5.465300000000 |
| H  | 2.123426000000  | -5.573732000000 | -6.349731000000 |
| H  | 3.014658000000  | -4.327752000000 | -5.445914000000 |
| C  | 1.979630000000  | -5.748467000000 | -4.178796000000 |
| H  | 2.857934000000  | -6.412545000000 | -4.078074000000 |
| H  | 1.085955000000  | -6.404135000000 | -4.224297000000 |
| Ag | 1.651200000000  | -0.602175000000 | -1.835633000000 |
| Ag | -0.248725000000 | 1.588135000000  | -1.842377000000 |
| Ag | -1.201127000000 | -1.137304000000 | -1.923870000000 |
| Ag | 1.504146000000  | 3.614539000000  | 0.011215000000  |
| Ag | 3.955516000000  | 0.553279000000  | 0.084818000000  |
| F  | -5.191731000000 | -4.516166000000 | -3.461143000000 |
| F  | -4.780078000000 | -2.907810000000 | -4.899665000000 |

|    |                 |                 |                 |
|----|-----------------|-----------------|-----------------|
| F  | -5.865065000000 | -2.460844000000 | -3.046896000000 |
| N  | 1.475774000000  | 5.781181000000  | 0.688841000000  |
| N  | 4.256362000000  | -4.138592000000 | 0.869855000000  |
| N  | 5.814481000000  | 1.590503000000  | -0.660131000000 |
| O  | 3.437353000000  | -1.158342000000 | -3.410717000000 |
| O  | -0.654360000000 | 3.349782000000  | -3.498052000000 |
| O  | -2.564850000000 | -2.433004000000 | -3.482869000000 |
| O  | 4.599048000000  | -1.512964000000 | -1.471911000000 |
| O  | -1.001711000000 | 4.623479000000  | -1.629451000000 |
| O  | -3.574043000000 | -3.202576000000 | -1.578675000000 |
| S  | 2.207282000000  | 1.801693000000  | -1.509628000000 |
| S  | -2.635663000000 | 0.879013000000  | -1.629520000000 |
| S  | 0.581289000000  | -2.825452000000 | -1.527712000000 |
| Ag | 2.423674000000  | -3.032050000000 | 0.106088000000  |
| C  | -0.337411000000 | 5.730783000000  | -3.615390000000 |
| C  | -2.738873000000 | 0.796012000000  | -4.461996000000 |
| H  | -2.741127000000 | -0.307704000000 | -4.391908000000 |
| H  | -1.688270000000 | 1.136666000000  | -4.474395000000 |
| C  | -3.450843000000 | 1.383008000000  | -3.238832000000 |
| C  | -3.458112000000 | 1.234119000000  | -5.752526000000 |
| H  | -3.360445000000 | 2.332208000000  | -5.871993000000 |
| H  | -2.955779000000 | 0.774513000000  | -6.623221000000 |
| C  | -5.642432000000 | 1.446663000000  | -4.488007000000 |
| H  | -6.703693000000 | 1.138732000000  | -4.448886000000 |
| H  | -5.633112000000 | 2.553809000000  | -4.554562000000 |
| C  | -4.946357000000 | 0.848900000000  | -5.721305000000 |
| H  | -5.450656000000 | 1.183486000000  | -6.646446000000 |
| H  | -5.035208000000 | -0.254916000000 | -5.685550000000 |
| C  | -4.937466000000 | 1.011905000000  | -3.188913000000 |
| H  | -5.416844000000 | 1.479984000000  | -2.310301000000 |
| H  | -5.035715000000 | -0.083334000000 | -3.066276000000 |
| H  | -3.334218000000 | 2.482397000000  | -3.242863000000 |
| C  | -3.079881000000 | -2.319840000000 | 3.046179000000  |
| H  | -4.017452000000 | -1.733011000000 | 3.018285000000  |
| C  | -2.305852000000 | -1.973315000000 | 4.322167000000  |
| H  | -1.317970000000 | -2.469163000000 | 4.294704000000  |
| H  | -2.143638000000 | -0.882426000000 | 4.370922000000  |
| C  | -3.092882000000 | -2.449186000000 | 5.558971000000  |
| H  | -4.036308000000 | -1.871482000000 | 5.636473000000  |
| H  | -2.508927000000 | -2.225005000000 | 6.470244000000  |
| C  | -3.412401000000 | -3.951104000000 | 5.478362000000  |
| H  | -3.994441000000 | -4.269337000000 | 6.362798000000  |
| H  | -2.465309000000 | -4.525273000000 | 5.491050000000  |
| C  | -4.179429000000 | -4.282421000000 | 4.187962000000  |
| H  | -4.370689000000 | -5.369013000000 | 4.113903000000  |
| H  | -5.170170000000 | -3.783519000000 | 4.203535000000  |
| C  | -3.398583000000 | -3.815975000000 | 2.944781000000  |
| H  | -3.972638000000 | -4.022071000000 | 2.023527000000  |
| H  | -2.452595000000 | -4.384645000000 | 2.869719000000  |
| C  | -0.673976000000 | 3.904969000000  | 3.060445000000  |
| H  | 0.257043000000  | 4.502166000000  | 3.038374000000  |
| C  | -0.710761000000 | 3.066130000000  | 4.342580000000  |
| H  | -1.580432000000 | 2.383893000000  | 4.303370000000  |
| H  | 0.205670000000  | 2.453690000000  | 4.410666000000  |
| C  | -1.890267000000 | 4.829794000000  | 2.932115000000  |
| H  | -1.814746000000 | 5.430724000000  | 2.007899000000  |
| H  | -2.804289000000 | 4.212461000000  | 2.846348000000  |
| C  | -4.332159000000 | 1.547038000000  | 2.772655000000  |
| C  | -5.461828000000 | 2.272708000000  | 3.562721000000  |
| C  | 0.680767000000  | -4.416952000000 | 2.840655000000  |
| C  | 3.545486000000  | 2.956477000000  | 2.790733000000  |



|    |                 |                 |                 |
|----|-----------------|-----------------|-----------------|
| C  | 4.870048000000  | 3.263652000000  | 3.551126000000  |
| C  | -0.418650000000 | -6.550877000000 | -0.409311000000 |
| H  | 0.245067000000  | -6.183905000000 | 0.381920000000  |
| C  | -0.187109000000 | -7.756624000000 | -1.082820000000 |
| H  | 0.681889000000  | -8.364717000000 | -0.814380000000 |
| C  | -1.070456000000 | -8.153056000000 | -2.095778000000 |
| H  | -0.907882000000 | -9.085115000000 | -2.646706000000 |
| C  | -2.168980000000 | -7.332364000000 | -2.387226000000 |
| H  | -2.890579000000 | -7.598379000000 | -3.165227000000 |
| C  | -2.335323000000 | -6.143457000000 | -1.667752000000 |
| H  | -3.169808000000 | -5.463406000000 | -1.863333000000 |
| C  | -4.166470000000 | 5.030121000000  | -1.781757000000 |
| H  | -3.149077000000 | 5.364140000000  | -2.006936000000 |
| C  | -5.274324000000 | 5.509916000000  | -2.490138000000 |
| H  | -5.127387000000 | 6.236911000000  | -3.294325000000 |
| C  | -6.550834000000 | 5.040031000000  | -2.151700000000 |
| H  | -7.436490000000 | 5.390733000000  | -2.691426000000 |
| C  | -6.669208000000 | 4.114819000000  | -1.105914000000 |
| H  | -7.643614000000 | 3.722595000000  | -0.799797000000 |
| C  | -5.512799000000 | 3.677106000000  | -0.448319000000 |
| H  | -5.544957000000 | 2.941319000000  | 0.363461000000  |
| C  | -6.605284000000 | -0.950789000000 | 1.501426000000  |
| H  | -6.413052000000 | 0.116179000000  | 1.644187000000  |
| C  | -7.587671000000 | -1.625975000000 | 2.234354000000  |
| H  | -8.183905000000 | -1.077419000000 | 2.969360000000  |
| C  | -6.983014000000 | -3.636495000000 | 1.050080000000  |
| H  | -7.096413000000 | -4.703265000000 | 0.835766000000  |
| C  | -6.017062000000 | -2.894580000000 | 0.359768000000  |
| H  | -5.357512000000 | -3.341837000000 | -0.392436000000 |
| C  | -7.777437000000 | -2.996753000000 | 2.011047000000  |
| H  | -8.532249000000 | -3.555130000000 | 2.574110000000  |
| C  | -0.832830000000 | 3.986911000000  | 5.572657000000  |
| H  | 0.088007000000  | 4.597851000000  | 5.666464000000  |
| H  | -0.896061000000 | 3.368028000000  | 6.486267000000  |
| C  | -2.054881000000 | 4.913383000000  | 5.461900000000  |
| H  | -2.114451000000 | 5.579307000000  | 6.342339000000  |
| H  | -2.978169000000 | 4.301287000000  | 5.456301000000  |
| C  | -2.003168000000 | 5.741892000000  | 4.168068000000  |
| H  | -2.903466000000 | 6.376921000000  | 4.074326000000  |
| H  | -1.130328000000 | 6.426001000000  | 4.196798000000  |
| Ag | -1.625021000000 | 0.638595000000  | 1.847875000000  |
| Ag | 0.259385000000  | -1.564968000000 | 1.839478000000  |
| Ag | 1.234078000000  | 1.157076000000  | 1.912100000000  |
| Ag | -1.465635000000 | -3.582769000000 | -0.018199000000 |
| Ag | -3.943336000000 | -0.583706000000 | -0.145949000000 |
| F  | 5.198833000000  | 4.583444000000  | 3.428213000000  |
| F  | 4.820027000000  | 2.971786000000  | 4.871326000000  |
| F  | 5.901433000000  | 2.538102000000  | 3.012962000000  |
| N  | -1.471743000000 | -5.749982000000 | -0.701308000000 |
| N  | -4.277156000000 | 4.120672000000  | -0.784236000000 |
| N  | -5.823404000000 | -1.572626000000 | 0.586878000000  |
| O  | -3.372620000000 | 1.127384000000  | 3.477377000000  |
| O  | 0.650929000000  | -3.337476000000 | 3.491005000000  |
| O  | 2.609547000000  | 2.447946000000  | 3.465160000000  |
| O  | -4.485220000000 | 1.505415000000  | 1.516711000000  |
| O  | 0.970239000000  | -4.620313000000 | 1.623826000000  |
| O  | 3.589285000000  | 3.250546000000  | 1.558677000000  |
| S  | -2.195686000000 | -1.765386000000 | 1.489764000000  |
| S  | 2.649536000000  | -0.866658000000 | 1.618415000000  |
| S  | -0.536989000000 | 2.852147000000  | 1.519256000000  |
| Ag | -2.416301000000 | 3.005170000000  | -0.083634000000 |

|   |                 |                 |                 |
|---|-----------------|-----------------|-----------------|
| F | -5.668484000000 | 1.738883000000  | 4.788989000000  |
| F | -6.655097000000 | 2.241833000000  | 2.896556000000  |
| F | -5.133362000000 | 3.591196000000  | 3.731098000000  |
| C | 0.292862000000  | -5.712868000000 | 3.613338000000  |
| F | 1.311205000000  | -6.622610000000 | 3.566268000000  |
| F | -0.800690000000 | -6.299165000000 | 3.032065000000  |
| F | -0.008602000000 | -5.500539000000 | 4.915399000000  |
| C | 2.748617000000  | -0.783249000000 | 4.452069000000  |
| H | 2.719590000000  | 0.320202000000  | 4.383501000000  |
| H | 1.708952000000  | -1.155570000000 | 4.464058000000  |
| C | 3.479317000000  | -1.345603000000 | 3.228356000000  |
| C | 3.481243000000  | -1.201107000000 | 5.742092000000  |
| H | 3.417932000000  | -2.301971000000 | 5.859542000000  |
| H | 2.964373000000  | -0.759242000000 | 6.613464000000  |
| C | 5.671741000000  | -1.341203000000 | 4.477609000000  |
| H | 6.722424000000  | -0.998797000000 | 4.439578000000  |
| H | 5.698280000000  | -2.448362000000 | 4.540320000000  |
| C | 4.956762000000  | -0.769680000000 | 5.712591000000  |
| H | 5.470841000000  | -1.091474000000 | 6.636903000000  |
| H | 5.011769000000  | 0.336350000000  | 5.680039000000  |
| C | 4.952914000000  | -0.925132000000 | 3.180225000000  |
| H | 5.447432000000  | -1.373903000000 | 2.300012000000  |
| H | 5.014986000000  | 0.172891000000  | 3.061224000000  |
| H | 3.400437000000  | -2.448435000000 | 3.230803000000  |
| F | 0.753286000000  | 6.326879000000  | -3.038692000000 |
| F | -0.041772000000 | 5.526901000000  | -4.920435000000 |
| F | -1.365706000000 | 6.628180000000  | -3.558698000000 |
| F | 5.328474000000  | -3.845873000000 | -2.870266000000 |
| F | 5.109344000000  | -2.747732000000 | -4.756338000000 |
| F | 6.641081000000  | -2.132768000000 | -3.308406000000 |

**Conf1-Ag<sup>H</sup> (Ag<sub>12</sub>-pyz):**

|    |                 |                 |                 |
|----|-----------------|-----------------|-----------------|
| Ag | 0.111446000000  | 1.820568000000  | 2.235418000000  |
| Ag | 1.785298000000  | 3.608934000000  | 0.359568000000  |
| Ag | -1.301166000000 | -0.713204000000 | 1.929807000000  |
| Ag | 1.558998000000  | -0.676016000000 | 1.906399000000  |
| Ag | 3.795438000000  | 0.365931000000  | 0.078405000000  |
| Ag | -3.637835000000 | -0.079570000000 | 0.203027000000  |
| Ag | -1.912251000000 | 3.271022000000  | -0.223901000000 |
| Ag | 2.633124000000  | -2.945521000000 | 0.424867000000  |
| Ag | -1.663519000000 | -3.392475000000 | -0.194151000000 |
| Ag | -0.063332000000 | -1.791566000000 | -2.159103000000 |
| Ag | 1.594806000000  | 0.621315000000  | -1.855562000000 |
| Ag | -1.288469000000 | 0.832730000000  | -1.898198000000 |
| C  | 5.443403000000  | 6.134508000000  | 1.112451000000  |
| C  | 3.721962000000  | 7.314563000000  | 2.025662000000  |
| C  | 4.541324000000  | 5.206376000000  | 0.573259000000  |
| C  | 2.797528000000  | 6.403707000000  | 1.495950000000  |
| C  | -0.423940000000 | 4.783060000000  | 2.780655000000  |
| C  | -1.117851000000 | 6.041298000000  | 3.383234000000  |
| C  | 3.532732000000  | 2.082418000000  | 3.416888000000  |
| C  | 4.990083000000  | 2.318088000000  | 2.997035000000  |
| C  | 2.938909000000  | 3.286116000000  | 4.157397000000  |
| C  | 5.849675000000  | 2.681498000000  | 4.222464000000  |
| C  | 5.271907000000  | 3.894443000000  | 4.968785000000  |
| C  | 3.811474000000  | 3.643911000000  | 5.376737000000  |
| C  | -7.849510000000 | 1.640050000000  | 0.405624000000  |
| C  | -7.964036000000 | -0.335301000000 | 1.533856000000  |

|   |                 |                 |                 |
|---|-----------------|-----------------|-----------------|
| C | -6.513819000000 | 1.384749000000  | 0.063660000000  |
| C | -6.631162000000 | -0.617782000000 | 1.204303000000  |
| C | -3.623108000000 | -2.501868000000 | 2.767373000000  |
| C | -4.342576000000 | -3.689164000000 | 3.473893000000  |
| C | -3.304007000000 | 2.218528000000  | 3.033955000000  |
| C | -4.287489000000 | 3.259282000000  | 2.483901000000  |
| C | -4.014272000000 | 1.077822000000  | 3.766261000000  |
| C | -5.179656000000 | 3.806367000000  | 3.613647000000  |
| C | -5.910378000000 | 2.670340000000  | 4.346965000000  |
| C | -4.911086000000 | 1.635602000000  | 4.888143000000  |
| C | 2.379415000000  | -7.430297000000 | -0.271851000000 |
| C | 3.971825000000  | -7.158238000000 | 1.334442000000  |
| C | 2.196013000000  | -6.041635000000 | -0.347236000000 |
| C | 3.822643000000  | -5.765472000000 | 1.268892000000  |
| C | 4.276934000000  | -1.940573000000 | 3.135631000000  |
| C | 5.666265000000  | -1.578250000000 | 3.748242000000  |
| C | -0.075006000000 | -3.839755000000 | 2.966570000000  |
| C | -0.318338000000 | -5.280819000000 | 2.498015000000  |
| C | 1.152348000000  | -3.728140000000 | 3.873660000000  |
| C | -0.453591000000 | -6.221785000000 | 3.710077000000  |
| C | 0.777714000000  | -6.128963000000 | 4.624635000000  |
| C | 1.014901000000  | -4.679805000000 | 5.077655000000  |
| C | -5.329506000000 | -6.021069000000 | -0.388153000000 |
| C | -3.727670000000 | -7.176322000000 | -1.522425000000 |
| C | -4.390980000000 | -5.044939000000 | -0.025277000000 |
| C | -2.766921000000 | -6.217383000000 | -1.172643000000 |
| C | 0.091475000000  | -4.573349000000 | -3.145238000000 |
| C | 0.331256000000  | -5.913481000000 | -3.902864000000 |
| C | -3.611109000000 | -1.811689000000 | -2.984188000000 |
| C | -5.000936000000 | -2.089845000000 | -2.396905000000 |
| C | -3.074861000000 | -3.005115000000 | -3.778624000000 |
| C | -5.986462000000 | -2.500587000000 | -3.506980000000 |
| C | -5.462140000000 | -3.708887000000 | -4.298341000000 |
| C | -4.070549000000 | -3.416352000000 | -4.879979000000 |
| C | 7.226630000000  | -2.416964000000 | -0.927537000000 |
| C | 7.694832000000  | -0.489966000000 | -2.048125000000 |
| C | 6.178499000000  | -1.784088000000 | -0.244101000000 |
| C | 6.652359000000  | 0.166129000000  | -1.378022000000 |
| C | 4.056673000000  | 2.566231000000  | -2.310076000000 |
| C | 4.791505000000  | 3.796952000000  | -2.923906000000 |
| C | 3.185708000000  | -2.294233000000 | -3.441865000000 |
| C | 3.869821000000  | -3.639958000000 | -3.161078000000 |
| C | 4.170465000000  | -1.250359000000 | -3.979210000000 |
| C | 4.583555000000  | -4.157320000000 | -4.424018000000 |
| C | 5.578591000000  | -3.120410000000 | -4.969938000000 |
| C | 4.881060000000  | -1.777166000000 | -5.240191000000 |
| C | -2.464551000000 | 7.740305000000  | -0.715024000000 |
| C | -4.186284000000 | 6.804426000000  | -1.874215000000 |
| C | -2.059021000000 | 6.475964000000  | -0.265133000000 |
| C | -3.807265000000 | 5.528127000000  | -1.435546000000 |
| C | -3.981591000000 | 1.976245000000  | -2.753970000000 |
| C | -5.362359000000 | 2.078828000000  | -3.469199000000 |
| C | 0.463629000000  | 3.830618000000  | -2.966164000000 |
| C | 0.746066000000  | 5.265628000000  | -2.503834000000 |
| C | -0.788863000000 | 3.749670000000  | -3.841783000000 |
| C | 0.861492000000  | 6.213208000000  | -3.712126000000 |
| C | -0.397413000000 | 6.148115000000  | -4.590886000000 |
| C | -0.672640000000 | 4.706032000000  | -5.044229000000 |
| H | 6.521226000000  | 6.012955000000  | 0.951755000000  |
| H | 3.377458000000  | 8.169122000000  | 2.620152000000  |
| H | 4.866970000000  | 4.338641000000  | -0.009894000000 |

|   |                 |                 |                 |
|---|-----------------|-----------------|-----------------|
| H | 1.718914000000  | 6.493381000000  | 1.662334000000  |
| H | 3.463140000000  | 1.165586000000  | 4.028198000000  |
| H | 5.025700000000  | 3.143082000000  | 2.259613000000  |
| H | 5.391883000000  | 1.417712000000  | 2.500646000000  |
| H | 1.898802000000  | 3.080692000000  | 4.464076000000  |
| H | 2.897477000000  | 4.151156000000  | 3.465905000000  |
| H | 5.893044000000  | 1.807586000000  | 4.900071000000  |
| H | 6.886860000000  | 2.879872000000  | 3.895125000000  |
| H | 5.319115000000  | 4.785902000000  | 4.309922000000  |
| H | 5.884655000000  | 4.125521000000  | 5.858853000000  |
| H | 3.386319000000  | 4.530934000000  | 5.881010000000  |
| H | 3.772090000000  | 2.812718000000  | 6.108383000000  |
| H | -8.337044000000 | 2.564282000000  | 0.073067000000  |
| H | -8.546542000000 | -1.043041000000 | 2.135796000000  |
| H | -5.911796000000 | 2.074904000000  | -0.537466000000 |
| H | -6.120526000000 | -1.531314000000 | 1.528445000000  |
| H | -2.572608000000 | 2.709970000000  | 3.699522000000  |
| H | -4.917764000000 | 2.784061000000  | 1.708089000000  |
| H | -3.736561000000 | 4.081313000000  | 1.994125000000  |
| H | -3.281556000000 | 0.358108000000  | 4.168544000000  |
| H | -4.636942000000 | 0.518221000000  | 3.040863000000  |
| H | -4.549606000000 | 4.368653000000  | 4.330713000000  |
| H | -5.901283000000 | 4.530383000000  | 3.192553000000  |
| H | -6.608582000000 | 2.171873000000  | 3.643255000000  |
| H | -6.526348000000 | 3.077563000000  | 5.169064000000  |
| H | -5.439559000000 | 0.799753000000  | 5.381936000000  |
| H | -4.275502000000 | 2.109977000000  | 5.662227000000  |
| H | 1.788411000000  | -8.092521000000 | -0.915171000000 |
| H | 4.691227000000  | -7.604329000000 | 2.031543000000  |
| H | 1.438974000000  | -5.592733000000 | -1.000888000000 |
| H | 4.397508000000  | -5.074649000000 | 1.895015000000  |
| H | -0.968635000000 | -3.460862000000 | 3.491409000000  |
| H | 0.530323000000  | -5.607217000000 | 1.866794000000  |
| H | -1.226292000000 | -5.328578000000 | 1.869135000000  |
| H | 1.285256000000  | -2.687285000000 | 4.215391000000  |
| H | 2.062618000000  | -3.982342000000 | 3.296991000000  |
| H | -1.362874000000 | -5.945827000000 | 4.278692000000  |
| H | -0.602532000000 | -7.258211000000 | 3.355203000000  |
| H | 1.669613000000  | -6.488992000000 | 4.071227000000  |
| H | 0.657316000000  | -6.792345000000 | 5.500280000000  |
| H | 1.922244000000  | -4.608173000000 | 5.704948000000  |
| H | 0.165118000000  | -4.350202000000 | 5.708235000000  |
| H | -6.372578000000 | -5.930476000000 | -0.062158000000 |
| H | -3.446760000000 | -8.040337000000 | -2.136359000000 |
| H | -4.649556000000 | -4.170394000000 | 0.581263000000  |
| H | -1.724641000000 | -6.275417000000 | -1.503372000000 |
| H | -3.636834000000 | -0.905601000000 | -3.614214000000 |
| H | -4.919019000000 | -2.905335000000 | -1.652215000000 |
| H | -5.372913000000 | -1.200247000000 | -1.859725000000 |
| H | -2.088981000000 | -2.770905000000 | -4.213533000000 |
| H | -2.920605000000 | -3.856395000000 | -3.085871000000 |
| H | -6.135512000000 | -1.642593000000 | -4.191234000000 |
| H | -6.972385000000 | -2.721971000000 | -3.057897000000 |
| H | -5.399386000000 | -4.587908000000 | -3.624100000000 |
| H | -6.168944000000 | -3.977030000000 | -5.104416000000 |
| H | -3.674315000000 | -4.297498000000 | -5.416697000000 |
| H | -4.148521000000 | -2.599278000000 | -5.624648000000 |
| H | 7.453315000000  | -3.472010000000 | -0.732310000000 |
| H | 8.306536000000  | 0.048241000000  | -2.781838000000 |
| H | 5.574057000000  | -2.303819000000 | 0.508413000000  |
| H | 6.410343000000  | 1.218437000000  | -1.557133000000 |

|   |                 |                 |                 |
|---|-----------------|-----------------|-----------------|
| H | 2.352895000000  | -2.450243000000 | -4.150311000000 |
| H | 4.606642000000  | -3.505179000000 | -2.343060000000 |
| H | 3.126023000000  | -4.376946000000 | -2.811003000000 |
| H | 3.651333000000  | -0.298026000000 | -4.183897000000 |
| H | 4.922786000000  | -1.034424000000 | -3.196094000000 |
| H | 3.822985000000  | -4.387860000000 | -5.195188000000 |
| H | 5.097023000000  | -5.108786000000 | -4.192601000000 |
| H | 6.390694000000  | -2.966900000000 | -4.230624000000 |
| H | 6.056642000000  | -3.497748000000 | -5.892110000000 |
| H | 5.608053000000  | -1.023467000000 | -5.595022000000 |
| H | 4.137111000000  | -1.905933000000 | -6.051580000000 |
| H | -1.910791000000 | 8.636661000000  | -0.411034000000 |
| H | -5.055253000000 | 6.926237000000  | -2.531872000000 |
| H | -1.197593000000 | 6.328736000000  | 0.395378000000  |
| H | -4.348944000000 | 4.620535000000  | -1.720618000000 |
| H | 1.339535000000  | 3.426709000000  | -3.504008000000 |
| H | -0.081473000000 | 5.599224000000  | -1.848720000000 |
| H | 1.670251000000  | 5.297310000000  | -1.899628000000 |
| H | -0.960772000000 | 2.714907000000  | -4.184328000000 |
| H | -1.672036000000 | 4.026586000000  | -3.232400000000 |
| H | 1.749510000000  | 5.929141000000  | -4.310499000000 |
| H | 1.038027000000  | 7.243940000000  | -3.353470000000 |
| H | -1.266415000000 | 6.521718000000  | -4.010747000000 |
| H | -0.290441000000 | 6.813620000000  | -5.466465000000 |
| H | -1.600388000000 | 4.651379000000  | -5.642293000000 |
| H | 0.150738000000  | 4.365577000000  | -5.703285000000 |
| N | 5.051241000000  | 7.191963000000  | 1.847180000000  |
| N | 3.211056000000  | 5.339828000000  | 0.771148000000  |
| N | -8.588629000000 | 0.793475000000  | 1.146421000000  |
| N | -5.900233000000 | 0.251759000000  | 0.471117000000  |
| N | 3.260839000000  | -8.006115000000 | 0.566372000000  |
| N | 2.928694000000  | -5.207167000000 | 0.422502000000  |
| N | -5.016968000000 | -7.091287000000 | -1.142411000000 |
| N | -3.103517000000 | -5.141475000000 | -0.425901000000 |
| N | 7.986046000000  | -1.788585000000 | -1.844651000000 |
| N | 5.878917000000  | -0.489180000000 | -0.485589000000 |
| N | -3.521319000000 | 7.923287000000  | -1.528345000000 |
| N | -2.730604000000 | 5.361871000000  | -0.634526000000 |
| S | 2.534142000000  | 1.707772000000  | 1.880994000000  |
| S | -2.277670000000 | 1.570683000000  | 1.603190000000  |
| S | 0.302482000000  | 2.736105000000  | -1.447647000000 |
| S | 0.093524000000  | -2.739504000000 | 1.454358000000  |
| S | -2.449468000000 | -1.379994000000 | -1.576237000000 |
| S | 2.387894000000  | -1.708785000000 | -1.855108000000 |
| O | -0.023886000000 | 4.928685000000  | 1.586912000000  |
| O | -0.392820000000 | 3.767444000000  | 3.528598000000  |
| O | -4.003377000000 | -2.278031000000 | 1.580036000000  |
| O | -2.710479000000 | -1.949320000000 | 3.441567000000  |
| O | 4.330279000000  | -2.861399000000 | 2.261572000000  |
| O | 3.307478000000  | -1.242049000000 | 3.531405000000  |
| O | -0.149872000000 | -4.676765000000 | -1.905030000000 |
| O | 0.172125000000  | -3.538214000000 | -3.860641000000 |
| O | 4.351288000000  | 2.351117000000  | -1.088241000000 |
| O | 3.253242000000  | 1.972082000000  | -3.068511000000 |
| O | -3.975095000000 | 2.392663000000  | -1.555386000000 |
| O | -3.058419000000 | 1.447870000000  | -3.429208000000 |
| F | -1.093981000000 | 6.069139000000  | 4.731012000000  |
| F | -2.432102000000 | 6.066609000000  | 2.987301000000  |
| F | -0.543489000000 | 7.194248000000  | 2.930037000000  |
| F | -4.386973000000 | -3.559800000000 | 4.816366000000  |
| F | -3.671898000000 | -4.854094000000 | 3.188340000000  |

|   |                 |                 |                 |
|---|-----------------|-----------------|-----------------|
| F | -5.622271000000 | -3.845899000000 | 3.026807000000  |
| F | 5.571188000000  | -0.821508000000 | 4.868615000000  |
| F | 6.380605000000  | -0.844939000000 | 2.825810000000  |
| F | 6.401698000000  | -2.675904000000 | 4.045387000000  |
| F | -0.603913000000 | -6.099955000000 | -4.869051000000 |
| F | 1.557707000000  | -5.930472000000 | -4.491019000000 |
| F | 0.272160000000  | -6.996023000000 | -3.067115000000 |
| F | 4.874480000000  | 3.738045000000  | -4.268533000000 |
| F | 4.112984000000  | 4.946660000000  | -2.599917000000 |
| F | 6.055390000000  | 3.924222000000  | -2.429909000000 |
| F | -5.259594000000 | 2.164327000000  | -4.811388000000 |
| F | -6.109595000000 | 0.964773000000  | -3.176976000000 |
| F | -6.076112000000 | 3.160084000000  | -3.035831000000 |
| H | 3.001753000000  | -1.138345000000 | 0.707664000000  |

**Conf2-S<sup>H</sup> (Ag<sub>12</sub>-pyz):**

|    |                 |                 |                 |
|----|-----------------|-----------------|-----------------|
| Ag | 0.135706000000  | 1.672650000000  | 2.333934000000  |
| Ag | 1.827906000000  | 3.267357000000  | 0.308718000000  |
| Ag | -1.520834000000 | -0.713012000000 | 2.346041000000  |
| Ag | 1.373702000000  | -0.953937000000 | 2.338464000000  |
| Ag | 3.833095000000  | 0.061653000000  | -0.162781000000 |
| Ag | -3.745788000000 | -0.052565000000 | 0.309287000000  |
| Ag | -1.965608000000 | 3.286479000000  | -0.161035000000 |
| Ag | 1.901772000000  | -3.213503000000 | 0.308154000000  |
| Ag | -1.868700000000 | -3.352607000000 | -0.166233000000 |
| Ag | -0.101165000000 | -1.670277000000 | -1.967206000000 |
| Ag | 1.498457000000  | 0.747077000000  | -1.972401000000 |
| Ag | -1.395660000000 | 0.923798000000  | -1.969322000000 |
| C  | 5.426606000000  | 6.041081000000  | 0.373315000000  |
| C  | 3.793032000000  | 7.191186000000  | 1.466932000000  |
| C  | 4.522543000000  | 5.012040000000  | 0.073473000000  |
| C  | 2.866985000000  | 6.179521000000  | 1.177358000000  |
| C  | -0.286434000000 | 4.643189000000  | 2.757091000000  |
| C  | -0.909989000000 | 5.928062000000  | 3.378037000000  |
| C  | 3.718902000000  | 1.786786000000  | 3.024760000000  |
| C  | 5.109651000000  | 2.114056000000  | 2.464141000000  |
| C  | 3.121679000000  | 2.964141000000  | 3.802241000000  |
| C  | 6.055982000000  | 2.566164000000  | 3.591523000000  |
| C  | 5.470879000000  | 3.759368000000  | 4.363369000000  |
| C  | 4.078590000000  | 3.421625000000  | 4.919552000000  |
| C  | -7.949432000000 | 1.670985000000  | 0.399676000000  |
| C  | -8.122727000000 | -0.328136000000 | 1.477083000000  |
| C  | -6.607063000000 | 1.406492000000  | 0.092643000000  |
| C  | -6.784175000000 | -0.620188000000 | 1.180638000000  |
| C  | -3.873534000000 | -2.576383000000 | 2.755223000000  |
| C  | -4.663884000000 | -3.770625000000 | 3.367113000000  |
| C  | -3.407994000000 | 2.335272000000  | 3.026641000000  |
| C  | -4.376537000000 | 3.385262000000  | 2.465483000000  |
| C  | -4.141119000000 | 1.237035000000  | 3.804011000000  |
| C  | -5.232413000000 | 3.989851000000  | 3.593528000000  |
| C  | -5.985236000000 | 2.895918000000  | 4.367055000000  |
| C  | -5.008280000000 | 1.847171000000  | 4.921895000000  |
| C  | 2.554184000000  | -7.711806000000 | 0.363871000000  |
| C  | 4.356846000000  | -6.854167000000 | 1.460298000000  |
| C  | 2.097335000000  | -6.418674000000 | 0.071926000000  |
| C  | 3.926142000000  | -5.550370000000 | 1.178373000000  |
| C  | 4.149807000000  | -2.058403000000 | 2.776646000000  |
| C  | 5.576879000000  | -2.157099000000 | 3.392047000000  |
| C  | -0.321721000000 | -4.117342000000 | 3.023199000000  |
| C  | -0.713685000000 | -5.488736000000 | 2.456437000000  |

|   |                 |                 |                 |
|---|-----------------|-----------------|-----------------|
| C | 0.991553000000  | -4.175699000000 | 3.810102000000  |
| C | -0.790982000000 | -6.538053000000 | 3.580761000000  |
| C | 0.530534000000  | -6.614781000000 | 4.361464000000  |
| C | 0.914197000000  | -5.237040000000 | 4.924009000000  |
| C | -5.501163000000 | -6.019622000000 | -0.567739000000 |
| C | -3.841056000000 | -7.134795000000 | -1.658039000000 |
| C | -4.591195000000 | -5.034774000000 | -0.158770000000 |
| C | -2.908729000000 | -6.166406000000 | -1.260587000000 |
| C | 0.268786000000  | -4.585183000000 | -2.728676000000 |
| C | 0.856263000000  | -5.851623000000 | -3.420792000000 |
| C | -3.597246000000 | -1.733231000000 | -2.963243000000 |
| C | -5.010595000000 | -2.025450000000 | -2.443833000000 |
| C | -3.008133000000 | -2.916477000000 | -3.735632000000 |
| C | -5.936539000000 | -2.439674000000 | -3.602575000000 |
| C | -5.361733000000 | -3.638561000000 | -4.373291000000 |
| C | -3.945831000000 | -3.331279000000 | -4.885705000000 |
| C | 7.957018000000  | -1.757441000000 | -0.538884000000 |
| C | 8.099509000000  | 0.231590000000  | -1.640089000000 |
| C | 6.647884000000  | -1.457897000000 | -0.136746000000 |
| C | 6.793479000000  | 0.558616000000  | -1.249830000000 |
| C | 3.830118000000  | 2.521314000000  | -2.739275000000 |
| C | 4.630341000000  | 3.669938000000  | -3.423263000000 |
| C | 3.303129000000  | -2.252267000000 | -2.958406000000 |
| C | 4.254351000000  | -3.336162000000 | -2.436081000000 |
| C | 4.044516000000  | -1.155688000000 | -3.727755000000 |
| C | 5.073419000000  | -3.937813000000 | -3.593056000000 |
| C | 5.833979000000  | -2.847049000000 | -4.363492000000 |
| C | 4.869075000000  | -1.766689000000 | -4.877073000000 |
| C | -2.464456000000 | 7.769624000000  | -0.548154000000 |
| C | -4.261539000000 | 6.889772000000  | -1.636648000000 |
| C | -2.062533000000 | 6.488449000000  | -0.145242000000 |
| C | -3.885160000000 | 5.597483000000  | -1.245074000000 |
| C | -4.105252000000 | 2.054916000000  | -2.724602000000 |
| C | -5.500795000000 | 2.174286000000  | -3.407296000000 |
| C | 0.296096000000  | 3.986314000000  | -2.961234000000 |
| C | 0.743750000000  | 5.356908000000  | -2.438157000000 |
| C | -1.022898000000 | 4.064979000000  | -3.734440000000 |
| C | 0.844478000000  | 6.369596000000  | -3.594029000000 |
| C | -0.480753000000 | 6.467982000000  | -4.365899000000 |
| C | -0.916426000000 | 5.087576000000  | -4.881980000000 |
| H | 6.468114000000  | 5.975245000000  | 0.036600000000  |
| H | 3.485321000000  | 8.075575000000  | 2.037726000000  |
| H | 4.805713000000  | 4.121067000000  | -0.497703000000 |
| H | 1.821624000000  | 6.224750000000  | 1.500327000000  |
| H | 3.776565000000  | 0.891435000000  | 3.670087000000  |
| H | 5.012114000000  | 2.921758000000  | 1.713625000000  |
| H | 5.523165000000  | 1.235307000000  | 1.939007000000  |
| H | 2.136855000000  | 2.691913000000  | 4.221539000000  |
| H | 2.943406000000  | 3.802799000000  | 3.099815000000  |
| H | 6.222085000000  | 1.718484000000  | 4.285218000000  |
| H | 7.042438000000  | 2.821871000000  | 3.162664000000  |
| H | 5.391224000000  | 4.630768000000  | 3.681009000000  |
| H | 6.149816000000  | 4.058742000000  | 5.182225000000  |
| H | 3.641604000000  | 4.292788000000  | 5.440886000000  |
| H | 4.171208000000  | 2.614484000000  | 5.673202000000  |
| H | -8.415313000000 | 2.608308000000  | 0.072817000000  |
| H | -8.732069000000 | -1.042322000000 | 2.043898000000  |
| H | -5.979927000000 | 2.102489000000  | -0.475351000000 |
| H | -6.298253000000 | -1.549820000000 | 1.495070000000  |
| H | -2.657854000000 | 2.826325000000  | 3.672888000000  |
| H | -5.033807000000 | 2.902658000000  | 1.716881000000  |

|   |                 |                 |                 |
|---|-----------------|-----------------|-----------------|
| H | -3.814942000000 | 4.176025000000  | 1.938130000000  |
| H | -3.421017000000 | 0.511990000000  | 4.223190000000  |
| H | -4.785103000000 | 0.670640000000  | 3.101936000000  |
| H | -4.573555000000 | 4.550274000000  | 4.285760000000  |
| H | -5.938990000000 | 4.724556000000  | 3.165290000000  |
| H | -6.707328000000 | 2.399907000000  | 3.686009000000  |
| H | -6.577153000000 | 3.341542000000  | 5.186904000000  |
| H | -5.553395000000 | 1.039415000000  | 5.443479000000  |
| H | -4.349460000000 | 2.323069000000  | 5.675242000000  |
| H | 1.987735000000  | -8.586575000000 | 0.022763000000  |
| H | 5.279442000000  | -7.020793000000 | 2.029236000000  |
| H | 1.180796000000  | -6.227129000000 | -0.496900000000 |
| H | 4.476621000000  | -4.661917000000 | 1.505097000000  |
| H | -1.135449000000 | -3.729839000000 | 3.662960000000  |
| H | 0.043842000000  | -5.797435000000 | 1.710863000000  |
| H | -1.678469000000 | -5.417625000000 | 1.924309000000  |
| H | 1.233537000000  | -3.184999000000 | 4.234045000000  |
| H | 1.815052000000  | -4.428551000000 | 3.112586000000  |
| H | -1.615928000000 | -6.269261000000 | 4.269694000000  |
| H | -1.048593000000 | -7.522132000000 | 3.147602000000  |
| H | 1.333916000000  | -6.970433000000 | 3.683645000000  |
| H | 0.453244000000  | -7.355571000000 | 5.177782000000  |
| H | 1.884139000000  | -5.284027000000 | 5.451887000000  |
| H | 0.159872000000  | -4.924564000000 | 5.673263000000  |
| H | -6.556471000000 | -5.950137000000 | -0.278031000000 |
| H | -3.524873000000 | -7.986766000000 | -2.271754000000 |
| H | -4.883474000000 | -4.174953000000 | 0.452735000000  |
| H | -1.851221000000 | -6.210966000000 | -1.541952000000 |
| H | -3.607431000000 | -0.826607000000 | -3.593166000000 |
| H | -4.958986000000 | -2.842629000000 | -1.698785000000 |
| H | -5.414463000000 | -1.139951000000 | -1.923235000000 |
| H | -2.003798000000 | -2.668607000000 | -4.119918000000 |
| H | -2.875722000000 | -3.769593000000 | -3.040925000000 |
| H | -6.061222000000 | -1.579322000000 | -4.288833000000 |
| H | -6.940880000000 | -2.673890000000 | -3.203846000000 |
| H | -5.324357000000 | -4.520589000000 | -3.701020000000 |
| H | -6.025332000000 | -3.909062000000 | -5.214483000000 |
| H | -3.517832000000 | -4.206598000000 | -5.407578000000 |
| H | -3.995484000000 | -2.511356000000 | -5.629536000000 |
| H | 8.422285000000  | -2.704978000000 | -0.242012000000 |
| H | 8.682698000000  | 0.927102000000  | -2.255421000000 |
| H | 6.045845000000  | -2.136441000000 | 0.476374000000  |
| H | 6.305030000000  | 1.495401000000  | -1.538851000000 |
| H | 2.522894000000  | -2.709424000000 | -3.591806000000 |
| H | 4.938006000000  | -2.886559000000 | -1.690182000000 |
| H | 3.683122000000  | -4.124327000000 | -1.915870000000 |
| H | 3.335566000000  | -0.402297000000 | -4.112025000000 |
| H | 4.721608000000  | -0.622669000000 | -3.031096000000 |
| H | 4.387531000000  | -4.471140000000 | -4.279892000000 |
| H | 5.771998000000  | -4.695681000000 | -3.192819000000 |
| H | 6.582238000000  | -2.379452000000 | -3.690565000000 |
| H | 6.397275000000  | -3.291363000000 | -5.203973000000 |
| H | 5.420283000000  | -0.962652000000 | -5.398074000000 |
| H | 4.181156000000  | -2.213930000000 | -5.621903000000 |
| H | -1.877687000000 | 8.648966000000  | -0.256788000000 |
| H | -5.159503000000 | 7.042371000000  | -2.247265000000 |
| H | -1.169225000000 | 6.311210000000  | 0.462568000000  |
| H | -4.451316000000 | 4.703699000000  | -1.528269000000 |
| H | 1.088560000000  | 3.545771000000  | -3.591224000000 |
| H | 0.008066000000  | 5.715085000000  | -1.692555000000 |
| H | 1.712626000000  | 5.266842000000  | -1.917191000000 |



|   |                 |                 |                 |
|---|-----------------|-----------------|-----------------|
| H | -1.306846000000 | 3.071348000000  | -4.121579000000 |
| H | -1.829297000000 | 4.372322000000  | -3.039303000000 |
| H | 1.653862000000  | 6.052738000000  | -4.280493000000 |
| H | 1.139329000000  | 7.356596000000  | -3.192218000000 |
| H | -1.265675000000 | 6.872142000000  | -3.693679000000 |
| H | -0.384950000000 | 7.180237000000  | -5.205338000000 |
| H | -1.888255000000 | 5.151736000000  | -5.404622000000 |
| H | -0.179238000000 | 4.725444000000  | -5.625903000000 |
| N | 5.080875000000  | 7.135610000000  | 1.076308000000  |
| N | 3.236586000000  | 5.079851000000  | 0.483600000000  |
| N | -8.721097000000 | 0.817521000000  | 1.098148000000  |
| N | -6.020077000000 | 0.256272000000  | 0.491308000000  |
| N | 3.679104000000  | -7.948625000000 | 1.064018000000  |
| N | 2.785391000000  | -5.331977000000 | 0.486919000000  |
| N | -5.144560000000 | -7.074295000000 | -1.324415000000 |
| N | -3.288950000000 | -5.105990000000 | -0.512957000000 |
| N | 8.696021000000  | -0.926372000000 | -1.297360000000 |
| N | 6.061545000000  | -0.295826000000 | -0.500072000000 |
| N | -3.558822000000 | 7.988634000000  | -1.300750000000 |
| N | -2.774230000000 | 5.396161000000  | -0.501281000000 |
| S | 2.597131000000  | 1.272974000000  | 1.618922000000  |
| S | -2.406594000000 | 1.612620000000  | 1.622046000000  |
| S | 0.149038000000  | 2.815561000000  | -1.504551000000 |
| S | -0.208100000000 | -2.884148000000 | 1.621592000000  |
| S | -2.512118000000 | -1.279374000000 | -1.503773000000 |
| S | 2.365762000000  | -1.534638000000 | -1.502341000000 |
| O | 0.073172000000  | 4.753837000000  | 1.549223000000  |
| O | -0.267395000000 | 3.635522000000  | 3.519716000000  |
| O | -4.145484000000 | -2.318851000000 | 1.546868000000  |
| O | -3.019802000000 | -2.049833000000 | 3.524189000000  |
| O | 4.062891000000  | -2.419079000000 | 1.567170000000  |
| O | 3.267560000000  | -1.578317000000 | 3.543880000000  |
| O | -0.098441000000 | -4.756575000000 | -1.528571000000 |
| O | 0.281488000000  | -3.535094000000 | -3.428888000000 |
| O | 4.161098000000  | 2.282780000000  | -1.540174000000 |
| O | 2.915817000000  | 2.009259000000  | -3.442873000000 |
| O | -4.064273000000 | 2.457654000000  | -1.524335000000 |
| O | -3.204149000000 | 1.523001000000  | -3.430406000000 |
| F | -0.779954000000 | 5.989302000000  | 4.718345000000  |
| F | -2.250425000000 | 5.966577000000  | 3.084516000000  |
| F | -0.354354000000 | 7.059581000000  | 2.852138000000  |
| F | -4.783444000000 | -3.700081000000 | 4.707833000000  |
| F | -4.015627000000 | -4.942583000000 | 3.065138000000  |
| F | -5.920569000000 | -3.862768000000 | 2.839729000000  |
| F | 5.570968000000  | -2.301371000000 | 4.732168000000  |
| F | 6.275895000000  | -1.013127000000 | 3.096435000000  |
| F | 6.280183000000  | -3.201746000000 | 2.862509000000  |
| F | 0.687360000000  | -5.851527000000 | -4.759291000000 |
| F | 2.204276000000  | -5.921484000000 | -3.168949000000 |
| F | 0.301453000000  | -6.999460000000 | -2.930830000000 |
| F | 4.713791000000  | 3.534404000000  | -4.762886000000 |
| F | 4.014182000000  | 4.868952000000  | -3.161493000000 |
| F | 5.902015000000  | 3.762187000000  | -2.933609000000 |
| F | -5.426625000000 | 2.309959000000  | -4.747428000000 |
| F | -6.233667000000 | 1.043825000000  | -3.141183000000 |
| F | -6.213349000000 | 3.232687000000  | -2.919930000000 |
| H | -0.002434000000 | 0.004131000000  | 3.241362000000  |

**Conf1-Ag<sup>H</sup> (Ag<sub>12</sub>-py):**

|   |                |                 |                 |
|---|----------------|-----------------|-----------------|
| C | 3.284834000000 | -2.368646000000 | -3.180716000000 |
|---|----------------|-----------------|-----------------|

|   |                 |                 |                 |
|---|-----------------|-----------------|-----------------|
| H | 2.937343000000  | -3.413856000000 | -3.086093000000 |
| C | 2.814137000000  | -1.801098000000 | -4.525430000000 |
| H | 3.075625000000  | -0.726407000000 | -4.576718000000 |
| H | 1.715844000000  | -1.885786000000 | -4.603106000000 |
| C | 3.493297000000  | -2.559418000000 | -5.682228000000 |
| H | 3.147032000000  | -3.612967000000 | -5.679739000000 |
| H | 3.171206000000  | -2.123720000000 | -6.645553000000 |
| C | 5.025157000000  | -2.522199000000 | -5.556901000000 |
| H | 5.493137000000  | -3.093452000000 | -6.379580000000 |
| H | 5.371247000000  | -1.473990000000 | -5.657257000000 |
| C | 5.483437000000  | -3.072144000000 | -4.196365000000 |
| H | 6.582058000000  | -2.998672000000 | -4.095126000000 |
| H | 5.227917000000  | -4.149265000000 | -4.125080000000 |
| C | 4.810284000000  | -2.316570000000 | -3.034638000000 |
| H | 5.113183000000  | -2.747455000000 | -2.062904000000 |
| H | 5.139067000000  | -1.260078000000 | -3.037644000000 |
| C | -3.685907000000 | -1.321801000000 | -3.008040000000 |
| H | -4.388422000000 | -0.469443000000 | -2.943329000000 |
| C | -2.925899000000 | -1.243262000000 | -4.337212000000 |
| H | -2.139415000000 | -2.020342000000 | -4.355942000000 |
| H | -2.431022000000 | -0.260404000000 | -4.425179000000 |
| C | -4.457955000000 | -2.638617000000 | -2.859222000000 |
| H | -5.010914000000 | -2.649038000000 | -1.902776000000 |
| H | -3.737880000000 | -3.478028000000 | -2.824489000000 |
| C | -0.632404000000 | -4.369009000000 | -2.932971000000 |
| C | -1.425624000000 | -5.510919000000 | -3.634230000000 |
| C | 4.340565000000  | 1.877471000000  | -2.790621000000 |
| C | -3.683615000000 | 2.747575000000  | -2.787500000000 |
| C | -4.597139000000 | 3.824246000000  | -3.443080000000 |
| C | 6.567535000000  | 1.270884000000  | 0.461440000000  |
| H | 6.057754000000  | 1.851488000000  | -0.314272000000 |
| C | 7.677452000000  | 1.765823000000  | 1.156400000000  |
| H | 8.063153000000  | 2.761116000000  | 0.916632000000  |
| C | 8.263613000000  | 0.976684000000  | 2.155261000000  |
| H | 9.125412000000  | 1.342390000000  | 2.722858000000  |
| C | 7.723383000000  | -0.290931000000 | 2.411773000000  |
| H | 8.142636000000  | -0.947700000000 | 3.179603000000  |
| C | 6.616627000000  | -0.718855000000 | 1.669501000000  |
| H | 6.152281000000  | -1.694691000000 | 1.837427000000  |
| C | -3.972331000000 | -5.303938000000 | 1.577833000000  |
| H | -4.629409000000 | -4.446873000000 | 1.753698000000  |
| C | -4.081263000000 | -6.482498000000 | 2.325311000000  |
| H | -4.848395000000 | -6.560822000000 | 3.101234000000  |
| C | -3.192204000000 | -7.534840000000 | 2.066059000000  |
| H | -3.245217000000 | -8.465124000000 | 2.640856000000  |
| C | -2.234722000000 | -7.371171000000 | 1.055684000000  |
| H | -1.520377000000 | -8.163728000000 | 0.813807000000  |
| C | -2.187517000000 | -6.161840000000 | 0.351885000000  |
| H | -1.451160000000 | -5.970699000000 | -0.436719000000 |
| C | 2.459443000000  | -6.013125000000 | -1.709330000000 |
| H | 1.392517000000  | -6.019674000000 | -1.953731000000 |
| C | 3.357461000000  | -6.910215000000 | -2.299783000000 |
| H | 2.991597000000  | -7.644557000000 | -3.023621000000 |
| C | 5.115343000000  | -5.879305000000 | -1.012882000000 |
| H | 6.160759000000  | -5.787416000000 | -0.703426000000 |
| C | 4.156289000000  | -5.016406000000 | -0.467179000000 |
| H | 4.416087000000  | -4.247301000000 | 0.269497000000  |
| C | 4.713488000000  | -6.839348000000 | -1.950985000000 |
| H | 5.442256000000  | -7.521706000000 | -2.400612000000 |
| C | -3.895713000000 | -1.454783000000 | -5.515780000000 |
| H | -4.614988000000 | -0.611423000000 | -5.554219000000 |

|    |                 |                 |                 |
|----|-----------------|-----------------|-----------------|
| H  | -3.327169000000 | -1.428510000000 | -6.463246000000 |
| C  | -4.663807000000 | -2.779697000000 | -5.382259000000 |
| H  | -5.365208000000 | -2.906529000000 | -6.227366000000 |
| H  | -3.945419000000 | -3.622106000000 | -5.429223000000 |
| C  | -5.419540000000 | -2.841049000000 | -4.045295000000 |
| H  | -5.940456000000 | -3.809992000000 | -3.932723000000 |
| H  | -6.200677000000 | -2.053754000000 | -4.021008000000 |
| Ag | -0.076166000000 | -1.493947000000 | -2.172700000000 |
| Ag | 1.577160000000  | 0.887787000000  | -2.513127000000 |
| Ag | -1.311747000000 | 1.129561000000  | -2.090415000000 |
| Ag | 3.999408000000  | -0.493391000000 | -0.092132000000 |
| Ag | 1.434281000000  | -3.311987000000 | -0.305931000000 |
| F  | -5.789386000000 | 3.954474000000  | -2.786236000000 |
| F  | -4.873646000000 | 3.566825000000  | -4.740148000000 |
| F  | -3.975304000000 | 5.044206000000  | -3.380982000000 |
| N  | 6.039834000000  | 0.049187000000  | 0.714564000000  |
| N  | -3.036624000000 | -5.138454000000 | 0.612828000000  |
| N  | 2.848452000000  | -5.075204000000 | -0.813820000000 |
| O  | -0.360773000000 | -3.355457000000 | -3.634561000000 |
| O  | 3.456882000000  | 1.601685000000  | -3.655007000000 |
| O  | -2.850243000000 | 2.203153000000  | -3.566412000000 |
| O  | -0.370410000000 | -4.602092000000 | -1.716530000000 |
| O  | 4.223128000000  | 2.020572000000  | -1.541681000000 |
| O  | -3.836593000000 | 2.586524000000  | -1.542451000000 |
| S  | 2.481932000000  | -1.488341000000 | -1.737962000000 |
| S  | 0.380014000000  | 2.982004000000  | -1.496608000000 |
| S  | -2.567528000000 | -1.072997000000 | -1.522637000000 |
| Ag | -2.474733000000 | -3.055199000000 | -0.078178000000 |
| C  | 5.797429000000  | 1.996157000000  | -3.324096000000 |
| C  | 0.179195000000  | 3.793179000000  | -4.195007000000 |
| H  | -0.817469000000 | 3.313776000000  | -4.222863000000 |
| H  | 0.927516000000  | 3.016519000000  | -4.438928000000 |
| C  | 0.435577000000  | 4.334588000000  | -2.782534000000 |
| C  | 0.236202000000  | 4.937748000000  | -5.224921000000 |
| H  | 1.267919000000  | 5.342807000000  | -5.267684000000 |
| H  | 0.011882000000  | 4.536249000000  | -6.229898000000 |
| C  | -0.471007000000 | 6.598042000000  | -3.446559000000 |
| H  | -1.201680000000 | 7.382960000000  | -3.176726000000 |
| H  | 0.532979000000  | 7.068721000000  | -3.408731000000 |
| C  | -0.741491000000 | 6.068279000000  | -4.863956000000 |
| H  | -0.670531000000 | 6.888444000000  | -5.601755000000 |
| H  | -1.778642000000 | 5.682306000000  | -4.908323000000 |
| C  | -0.536831000000 | 5.460965000000  | -2.410270000000 |
| H  | -0.310029000000 | 5.837815000000  | -1.396629000000 |
| H  | -1.564475000000 | 5.051017000000  | -2.380446000000 |
| H  | 1.476134000000  | 4.706630000000  | -2.715718000000 |
| C  | -3.060252000000 | 2.194547000000  | 3.225306000000  |
| H  | -2.663831000000 | 3.226227000000  | 3.209303000000  |
| C  | -2.554925000000 | 1.474361000000  | 4.480113000000  |
| H  | -2.841936000000 | 0.407343000000  | 4.427742000000  |
| H  | -1.453030000000 | 1.532728000000  | 4.519115000000  |
| C  | -3.170690000000 | 2.112239000000  | 5.740443000000  |
| H  | -2.798492000000 | 3.151589000000  | 5.844505000000  |
| H  | -2.824824000000 | 1.560764000000  | 6.633668000000  |
| C  | -4.706593000000 | 2.118901000000  | 5.669676000000  |
| H  | -5.132593000000 | 2.591535000000  | 6.573689000000  |
| H  | -5.073983000000 | 1.073489000000  | 5.647612000000  |
| C  | -5.194005000000 | 2.846495000000  | 4.406338000000  |
| H  | -6.297352000000 | 2.819668000000  | 4.339239000000  |
| H  | -4.902402000000 | 3.915586000000  | 4.455597000000  |
| C  | -4.590964000000 | 2.214569000000  | 3.137512000000  |

|    |                 |                 |                 |
|----|-----------------|-----------------|-----------------|
| H  | -4.913030000000 | 2.766041000000  | 2.235900000000  |
| H  | -4.963191000000 | 1.178044000000  | 3.032335000000  |
| C  | 3.493582000000  | 1.271726000000  | 3.117729000000  |
| H  | 4.222032000000  | 0.440252000000  | 3.085041000000  |
| C  | 2.610166000000  | 1.118739000000  | 4.360497000000  |
| H  | 1.808582000000  | 1.879963000000  | 4.334467000000  |
| H  | 2.137687000000  | 0.120975000000  | 4.357120000000  |
| C  | 4.234069000000  | 2.613979000000  | 3.092296000000  |
| H  | 4.876376000000  | 2.678831000000  | 2.195922000000  |
| H  | 3.496317000000  | 3.435296000000  | 3.020705000000  |
| C  | 0.499406000000  | 4.328342000000  | 2.919760000000  |
| C  | 1.191844000000  | 5.455523000000  | 3.742972000000  |
| C  | -4.311688000000 | -1.914456000000 | 2.813090000000  |
| C  | 3.743614000000  | -2.730697000000 | 2.770252000000  |
| C  | 4.542616000000  | -3.816104000000 | 3.552702000000  |
| C  | -6.722560000000 | -1.120788000000 | -0.306625000000 |
| H  | -6.228779000000 | -1.772971000000 | 0.422181000000  |
| C  | -7.916354000000 | -1.474715000000 | -0.946179000000 |
| H  | -8.386482000000 | -2.435049000000 | -0.715062000000 |
| C  | -8.478960000000 | -0.592474000000 | -1.878518000000 |
| H  | -9.406854000000 | -0.847925000000 | -2.400354000000 |
| C  | -7.829914000000 | 0.624560000000  | -2.128098000000 |
| H  | -8.227835000000 | 1.349965000000  | -2.843731000000 |
| C  | -6.641619000000 | 0.909915000000  | -1.446417000000 |
| H  | -6.093094000000 | 1.841614000000  | -1.610665000000 |
| C  | 4.122767000000  | 5.279902000000  | -1.306664000000 |
| H  | 4.706375000000  | 4.375439000000  | -1.501230000000 |
| C  | 4.386513000000  | 6.482927000000  | -1.971743000000 |
| H  | 5.202220000000  | 6.530340000000  | -2.699157000000 |
| C  | 3.587878000000  | 7.600678000000  | -1.692572000000 |
| H  | 3.763291000000  | 8.553491000000  | -2.202455000000 |
| C  | 2.561011000000  | 7.473390000000  | -0.747173000000 |
| H  | 1.912307000000  | 8.317081000000  | -0.493777000000 |
| C  | 2.358570000000  | 6.236157000000  | -0.123994000000 |
| H  | 1.563395000000  | 6.069811000000  | 0.611313000000  |
| C  | -2.525298000000 | 5.884238000000  | 1.703561000000  |
| H  | -1.450062000000 | 5.910688000000  | 1.904109000000  |
| C  | -3.421999000000 | 6.721280000000  | 2.378496000000  |
| H  | -3.044961000000 | 7.423795000000  | 3.127707000000  |
| C  | -5.202610000000 | 5.714642000000  | 1.105032000000  |
| H  | -6.256794000000 | 5.611061000000  | 0.830988000000  |
| C  | -4.244200000000 | 4.908362000000  | 0.478141000000  |
| H  | -4.512374000000 | 4.168430000000  | -0.284277000000 |
| C  | -4.788512000000 | 6.632266000000  | 2.079729000000  |
| H  | -5.516024000000 | 7.268077000000  | 2.594793000000  |
| C  | 3.456926000000  | 1.301111000000  | 5.635016000000  |
| H  | 4.191538000000  | 0.473503000000  | 5.707796000000  |
| H  | 2.801788000000  | 1.221459000000  | 6.521652000000  |
| C  | 4.196720000000  | 2.648992000000  | 5.629212000000  |
| H  | 4.813782000000  | 2.754163000000  | 6.540503000000  |
| H  | 3.454226000000  | 3.471138000000  | 5.645359000000  |
| C  | 5.071641000000  | 2.789877000000  | 4.373200000000  |
| H  | 5.570346000000  | 3.776571000000  | 4.351483000000  |
| H  | 5.875537000000  | 2.025827000000  | 4.390218000000  |
| Ag | 0.116226000000  | 1.474555000000  | 1.884739000000  |
| Ag | -1.555367000000 | -0.891450000000 | 2.042808000000  |
| Ag | 1.364154000000  | -1.129808000000 | 1.782465000000  |
| Ag | -3.985670000000 | 0.361452000000  | 0.146089000000  |
| Ag | -1.476623000000 | 3.302590000000  | 0.100791000000  |
| F  | 5.887087000000  | -3.577231000000 | 3.479835000000  |
| F  | 4.213968000000  | -3.892433000000 | 4.863786000000  |

|    |                 |                 |                 |
|----|-----------------|-----------------|-----------------|
| F  | 4.319493000000  | -5.049030000000 | 3.003200000000  |
| N  | -6.090242000000 | 0.051446000000  | -0.555655000000 |
| N  | 3.122251000000  | 5.152449000000  | -0.403152000000 |
| N  | -2.925070000000 | 4.983456000000  | 0.775335000000  |
| O  | 0.175909000000  | 3.284856000000  | 3.549097000000  |
| O  | -3.285740000000 | -1.705717000000 | 3.517025000000  |
| O  | 2.860149000000  | -2.108833000000 | 3.422784000000  |
| O  | 0.357809000000  | 4.607186000000  | 1.691598000000  |
| O  | -4.410407000000 | -2.142586000000 | 1.570232000000  |
| O  | 4.075354000000  | -2.624875000000 | 1.553840000000  |
| S  | -2.369601000000 | 1.439087000000  | 1.657492000000  |
| S  | -0.300205000000 | -2.933186000000 | 1.427336000000  |
| S  | 2.541144000000  | 1.054615000000  | 1.517860000000  |
| Ag | 2.360437000000  | 3.102260000000  | 0.164477000000  |
| F  | 1.333643000000  | 5.162540000000  | 5.055979000000  |
| F  | 0.483131000000  | 6.620287000000  | 3.649861000000  |
| F  | 2.444310000000  | 5.704909000000  | 3.244166000000  |
| C  | -5.683674000000 | -1.862830000000 | 3.549217000000  |
| F  | -6.375008000000 | -3.025113000000 | 3.357644000000  |
| F  | -6.452109000000 | -0.847870000000 | 3.037268000000  |
| F  | -5.581484000000 | -1.655007000000 | 4.880998000000  |
| C  | -0.154408000000 | -3.462441000000 | 4.206219000000  |
| H  | 0.808038000000  | -2.918203000000 | 4.221784000000  |
| H  | -0.967797000000 | -2.728299000000 | 4.348871000000  |
| C  | -0.314797000000 | -4.150336000000 | 2.845785000000  |
| C  | -0.171443000000 | -4.513096000000 | 5.334161000000  |
| H  | -1.172234000000 | -4.989561000000 | 5.378042000000  |
| H  | -0.018833000000 | -4.007935000000 | 6.305262000000  |
| C  | 0.727828000000  | -6.268385000000 | 3.742401000000  |
| H  | 1.526779000000  | -7.013080000000 | 3.570341000000  |
| H  | -0.235297000000 | -6.818535000000 | 3.717820000000  |
| C  | 0.900799000000  | -5.592684000000 | 5.112416000000  |
| H  | 0.858263000000  | -6.347756000000 | 5.918881000000  |
| H  | 1.903546000000  | -5.126043000000 | 5.160680000000  |
| C  | 0.745484000000  | -5.231066000000 | 2.604337000000  |
| H  | 0.575764000000  | -5.718206000000 | 1.626879000000  |
| H  | 1.742514000000  | -4.756013000000 | 2.556031000000  |
| H  | -1.324080000000 | -4.599230000000 | 2.778515000000  |
| F  | 6.497185000000  | 0.865493000000  | -2.988371000000 |
| F  | 5.878476000000  | 2.146627000000  | -4.661478000000 |
| F  | 6.449435000000  | 3.051866000000  | -2.745941000000 |
| F  | -2.620246000000 | -5.716925000000 | -2.994262000000 |
| F  | -1.703933000000 | -5.261461000000 | -4.933457000000 |
| F  | -0.728528000000 | -6.683540000000 | -3.572244000000 |
| H  | -0.011140000000 | 0.169932000000  | -3.138462000000 |

**Conf2-S<sup>H</sup> (Ag<sub>12</sub>-py):**

|   |                |                 |                 |
|---|----------------|-----------------|-----------------|
| C | 5.981973000000 | 0.315347000000  | -1.961941000000 |
| H | 6.765863000000 | -0.324184000000 | -1.510231000000 |
| C | 5.952742000000 | 0.096550000000  | -3.484033000000 |
| H | 5.084802000000 | 0.640120000000  | -3.905142000000 |
| H | 5.801236000000 | -0.973043000000 | -3.711620000000 |
| C | 7.245447000000 | 0.625861000000  | -4.132682000000 |
| H | 8.108087000000 | 0.021950000000  | -3.785020000000 |
| H | 7.185922000000 | 0.490652000000  | -5.227835000000 |
| C | 7.480772000000 | 2.103422000000  | -3.780018000000 |
| H | 8.417964000000 | 2.465203000000  | -4.240955000000 |
| H | 6.658370000000 | 2.713421000000  | -4.200885000000 |
| C | 7.522785000000 | 2.303149000000  | -2.256041000000 |
| H | 7.656882000000 | 3.371453000000  | -2.005285000000 |

|    |                 |                 |                 |
|----|-----------------|-----------------|-----------------|
| H  | 8.399656000000  | 1.766738000000  | -1.839302000000 |
| C  | 6.238367000000  | 1.779820000000  | -1.586526000000 |
| H  | 6.294868000000  | 1.884952000000  | -0.488717000000 |
| H  | 5.379838000000  | 2.393126000000  | -1.914267000000 |
| C  | -1.450028000000 | -3.188852000000 | -3.582839000000 |
| H  | -2.525631000000 | -3.280329000000 | -3.828211000000 |
| C  | -0.768245000000 | -2.248103000000 | -4.586889000000 |
| H  | 0.269184000000  | -2.055962000000 | -4.252750000000 |
| H  | -1.301928000000 | -1.281813000000 | -4.613406000000 |
| C  | -0.798674000000 | -4.578596000000 | -3.554457000000 |
| H  | -1.343618000000 | -5.237244000000 | -2.851484000000 |
| H  | 0.233125000000  | -4.480263000000 | -3.165366000000 |
| C  | 2.861359000000  | -3.408377000000 | -2.733220000000 |
| C  | 3.887332000000  | -4.034437000000 | -3.720011000000 |
| C  | 2.799509000000  | 2.682411000000  | -2.956252000000 |
| C  | -4.169567000000 | 0.678849000000  | -3.292692000000 |
| C  | -4.955578000000 | 1.661017000000  | -4.213891000000 |
| C  | 4.301528000000  | 4.287137000000  | 0.559972000000  |
| H  | 3.810205000000  | 4.148781000000  | -0.409399000000 |
| C  | 4.631649000000  | 5.559957000000  | 1.043995000000  |
| H  | 4.399954000000  | 6.444046000000  | 0.441962000000  |
| C  | 5.245314000000  | 5.670171000000  | 2.299705000000  |
| H  | 5.507637000000  | 6.650873000000  | 2.710034000000  |
| C  | 5.512686000000  | 4.498411000000  | 3.021064000000  |
| H  | 5.986056000000  | 4.531623000000  | 4.006944000000  |
| C  | 5.152249000000  | 3.263513000000  | 2.465014000000  |
| H  | 5.318100000000  | 2.318215000000  | 2.992941000000  |
| C  | -0.615192000000 | -6.846718000000 | 1.421777000000  |
| H  | -1.649815000000 | -6.623778000000 | 1.705529000000  |
| C  | 0.172769000000  | -7.756647000000 | 2.137002000000  |
| H  | -0.248781000000 | -8.280327000000 | 3.000203000000  |
| C  | 1.498208000000  | -7.968867000000 | 1.730126000000  |
| H  | 2.143454000000  | -8.666624000000 | 2.273875000000  |
| C  | 1.979392000000  | -7.270042000000 | 0.614579000000  |
| H  | 3.005509000000  | -7.399973000000 | 0.256978000000  |
| C  | 1.126513000000  | -6.376483000000 | -0.046319000000 |
| H  | 1.476607000000  | -5.785949000000 | -0.899188000000 |
| C  | 5.385903000000  | -4.211470000000 | -0.296975000000 |
| H  | 4.651522000000  | -4.848023000000 | -0.798666000000 |
| C  | 6.757412000000  | -4.331898000000 | -0.545500000000 |
| H  | 7.113941000000  | -5.100954000000 | -1.236452000000 |
| C  | 7.117451000000  | -2.472539000000 | 0.945407000000  |
| H  | 7.761208000000  | -1.753869000000 | 1.460902000000  |
| C  | 5.733238000000  | -2.413634000000 | 1.142854000000  |
| H  | 5.287544000000  | -1.640630000000 | 1.776969000000  |
| C  | 7.642104000000  | -3.446657000000 | 0.084728000000  |
| H  | 8.720020000000  | -3.512051000000 | -0.095468000000 |
| C  | -0.737868000000 | -2.883148000000 | -5.990475000000 |
| H  | -1.773983000000 | -2.984423000000 | -6.373269000000 |
| H  | -0.208435000000 | -2.204175000000 | -6.683382000000 |
| C  | -0.063661000000 | -4.264342000000 | -5.965777000000 |
| H  | -0.070055000000 | -4.714245000000 | -6.975691000000 |
| H  | 0.998288000000  | -4.146284000000 | -5.673708000000 |
| C  | -0.765193000000 | -5.196952000000 | -4.964903000000 |
| H  | -0.258904000000 | -6.179109000000 | -4.922925000000 |
| H  | -1.803736000000 | -5.387291000000 | -5.304751000000 |
| Ag | 0.971604000000  | -1.634185000000 | -1.362905000000 |
| Ag | 1.216801000000  | 1.104912000000  | -1.131742000000 |
| Ag | -1.326415000000 | 0.008734000000  | -2.005972000000 |
| Ag | 3.497250000000  | 1.094832000000  | 0.616001000000  |
| Ag | 2.682681000000  | -2.935192000000 | 0.651860000000  |

|    |                 |                 |                 |
|----|-----------------|-----------------|-----------------|
| F  | -6.193887000000 | 1.166728000000  | -4.494324000000 |
| F  | -4.333257000000 | 1.909289000000  | -5.392276000000 |
| F  | -5.132590000000 | 2.869773000000  | -3.589296000000 |
| N  | 4.553528000000  | 3.155214000000  | 1.257147000000  |
| N  | -0.148980000000 | -6.161400000000 | 0.352350000000  |
| N  | 4.877440000000  | -3.268279000000 | 0.530527000000  |
| O  | 2.422361000000  | -2.275664000000 | -3.079624000000 |
| O  | 2.541721000000  | 1.496276000000  | -3.299874000000 |
| O  | -3.088533000000 | 0.220375000000  | -3.747077000000 |
| O  | 2.615183000000  | -4.075617000000 | -1.686231000000 |
| O  | 2.561069000000  | 3.250636000000  | -1.848696000000 |
| O  | -4.739278000000 | 0.463830000000  | -2.179174000000 |
| S  | 4.405459000000  | -0.359838000000 | -1.220419000000 |
| S  | -0.960993000000 | 2.424329000000  | -1.632773000000 |
| S  | -1.424578000000 | -2.463289000000 | -1.858557000000 |
| Ag | -1.140387000000 | -4.124148000000 | -0.073001000000 |
| C  | 3.472931000000  | 3.604935000000  | -4.013524000000 |
| C  | -0.613001000000 | 2.323480000000  | -4.458253000000 |
| H  | -1.574511000000 | 1.806512000000  | -4.621170000000 |
| H  | 0.140820000000  | 1.551324000000  | -4.224913000000 |
| C  | -0.765122000000 | 3.291260000000  | -3.279724000000 |
| C  | -0.182076000000 | 3.112023000000  | -5.725600000000 |
| H  | 0.918874000000  | 3.119319000000  | -5.806111000000 |
| H  | -0.560732000000 | 2.574705000000  | -6.614222000000 |
| C  | -2.062513000000 | 4.656707000000  | -5.003016000000 |
| H  | -2.775639000000 | 3.960375000000  | -5.480605000000 |
| H  | -2.499061000000 | 5.667558000000  | -5.096507000000 |
| C  | -0.711028000000 | 4.567596000000  | -5.726845000000 |
| H  | 0.015668000000  | 5.230460000000  | -5.217204000000 |
| H  | -0.795987000000 | 4.940350000000  | -6.763237000000 |
| C  | -1.918444000000 | 4.290378000000  | -3.503071000000 |
| H  | -1.734702000000 | 5.192307000000  | -2.892413000000 |
| H  | -2.866354000000 | 3.852462000000  | -3.141333000000 |
| H  | 0.184002000000  | 3.837935000000  | -3.142955000000 |
| C  | -4.362214000000 | 0.461190000000  | 2.403920000000  |
| H  | -4.451658000000 | 1.561643000000  | 2.476447000000  |
| C  | -3.865666000000 | -0.092673000000 | 3.742659000000  |
| H  | -3.682980000000 | -1.179249000000 | 3.642267000000  |
| H  | -2.911397000000 | 0.393535000000  | 4.015023000000  |
| C  | -4.923240000000 | 0.163798000000  | 4.834845000000  |
| H  | -5.019363000000 | 1.256550000000  | 4.997775000000  |
| H  | -4.574403000000 | -0.269549000000 | 5.790102000000  |
| C  | -6.290416000000 | -0.423547000000 | 4.444650000000  |
| H  | -7.040590000000 | -0.200756000000 | 5.225653000000  |
| H  | -6.205740000000 | -1.525085000000 | 4.381491000000  |
| C  | -6.760066000000 | 0.116371000000  | 3.083878000000  |
| H  | -7.718910000000 | -0.349314000000 | 2.789741000000  |
| H  | -6.943993000000 | 1.207961000000  | 3.156255000000  |
| C  | -5.706707000000 | -0.146697000000 | 1.990595000000  |
| H  | -6.035928000000 | 0.271344000000  | 1.023053000000  |
| H  | -5.583440000000 | -1.236410000000 | 1.849985000000  |
| C  | 1.806199000000  | 2.611089000000  | 3.631577000000  |
| H  | 2.855264000000  | 2.282990000000  | 3.741653000000  |
| C  | 0.935642000000  | 1.924052000000  | 4.689513000000  |
| H  | -0.125389000000 | 2.175042000000  | 4.502189000000  |
| H  | 1.044366000000  | 0.828724000000  | 4.606920000000  |
| C  | 1.741066000000  | 4.139818000000  | 3.716119000000  |
| H  | 2.405874000000  | 4.590987000000  | 2.958151000000  |
| H  | 0.713123000000  | 4.475796000000  | 3.485177000000  |
| C  | -2.118672000000 | 3.972024000000  | 2.743508000000  |
| C  | -2.249992000000 | 5.256144000000  | 3.617193000000  |

|    |                 |                 |                 |
|----|-----------------|-----------------|-----------------|
| C  | -3.501487000000 | -4.083457000000 | 2.119573000000  |
| C  | 3.787590000000  | -0.299501000000 | 3.496080000000  |
| C  | 4.276004000000  | -0.228829000000 | 4.975894000000  |
| C  | -4.679433000000 | -4.281572000000 | -1.634037000000 |
| H  | -4.228926000000 | -4.537644000000 | -0.668365000000 |
| C  | -4.998829000000 | -5.270190000000 | -2.573081000000 |
| H  | -4.794871000000 | -6.318837000000 | -2.337063000000 |
| C  | -5.568724000000 | -4.891215000000 | -3.795944000000 |
| H  | -5.818159000000 | -5.640965000000 | -4.553863000000 |
| C  | -5.818638000000 | -3.531114000000 | -4.026457000000 |
| H  | -6.269020000000 | -3.182713000000 | -4.960481000000 |
| C  | -5.472787000000 | -2.603241000000 | -3.037074000000 |
| H  | -5.642740000000 | -1.530870000000 | -3.169766000000 |
| C  | 0.967722000000  | 6.016687000000  | -1.687720000000 |
| H  | 1.802096000000  | 5.337459000000  | -1.891343000000 |
| C  | 0.687641000000  | 7.111560000000  | -2.513324000000 |
| H  | 1.326538000000  | 7.307106000000  | -3.379384000000 |
| C  | -0.418319000000 | 7.919755000000  | -2.215643000000 |
| H  | -0.666678000000 | 8.780286000000  | -2.845183000000 |
| C  | -1.206555000000 | 7.597661000000  | -1.101750000000 |
| H  | -2.083344000000 | 8.193920000000  | -0.832931000000 |
| C  | -0.870821000000 | 6.479007000000  | -0.329630000000 |
| H  | -1.469644000000 | 6.156516000000  | 0.528444000000  |
| C  | -5.297317000000 | 4.172670000000  | 1.049470000000  |
| H  | -4.382218000000 | 4.663239000000  | 1.391567000000  |
| C  | -6.543522000000 | 4.463896000000  | 1.614444000000  |
| H  | -6.609053000000 | 5.200571000000  | 2.420312000000  |
| C  | -7.520953000000 | 2.861369000000  | 0.101617000000  |
| H  | -8.375029000000 | 2.312905000000  | -0.306075000000 |
| C  | -6.240393000000 | 2.616586000000  | -0.408484000000 |
| H  | -6.053852000000 | 1.880379000000  | -1.198539000000 |
| C  | -7.678083000000 | 3.794293000000  | 1.135376000000  |
| H  | -8.666532000000 | 3.995620000000  | 1.560794000000  |
| C  | 1.335273000000  | 2.408938000000  | 6.097627000000  |
| H  | 2.366934000000  | 2.075356000000  | 6.321898000000  |
| H  | 0.676299000000  | 1.931432000000  | 6.845856000000  |
| C  | 1.252168000000  | 3.940711000000  | 6.201069000000  |
| H  | 1.556717000000  | 4.275258000000  | 7.209783000000  |
| H  | 0.201247000000  | 4.260404000000  | 6.057682000000  |
| C  | 2.128874000000  | 4.611641000000  | 5.131339000000  |
| H  | 2.041366000000  | 5.712673000000  | 5.185563000000  |
| H  | 3.194118000000  | 4.365618000000  | 5.316291000000  |
| Ag | -1.008784000000 | 1.277334000000  | 1.839035000000  |
| Ag | -1.524688000000 | -1.559613000000 | 1.507243000000  |
| Ag | 1.224727000000  | -0.528859000000 | 1.251487000000  |
| Ag | -3.714495000000 | -1.373009000000 | -0.749132000000 |
| Ag | -3.107264000000 | 2.566339000000  | -0.503599000000 |
| F  | 4.653609000000  | 1.047406000000  | 5.301794000000  |
| F  | 3.322589000000  | -0.598770000000 | 5.870994000000  |
| F  | 5.354135000000  | -1.037228000000 | 5.164973000000  |
| N  | -4.899934000000 | -2.964631000000 | -1.865038000000 |
| N  | 0.201070000000  | 5.701350000000  | -0.615880000000 |
| N  | -5.143453000000 | 3.259463000000  | 0.060877000000  |
| O  | -2.062931000000 | 2.873749000000  | 3.360344000000  |
| O  | -2.869382000000 | -3.221608000000 | 2.783989000000  |
| O  | 2.682002000000  | -0.865431000000 | 3.303455000000  |
| O  | -2.077660000000 | 4.205572000000  | 1.497757000000  |
| O  | -3.136652000000 | -4.778633000000 | 1.120715000000  |
| O  | 4.594974000000  | 0.222030000000  | 2.667843000000  |
| S  | -3.119486000000 | 0.257029000000  | 1.019376000000  |
| S  | 0.481198000000  | -3.019997000000 | 1.726159000000  |



|    |                 |                 |                 |
|----|-----------------|-----------------|-----------------|
| S  | 1.350445000000  | 2.046406000000  | 1.898172000000  |
| Ag | 0.448107000000  | 3.721106000000  | 0.380965000000  |
| F  | -2.186955000000 | 5.019166000000  | 4.947041000000  |
| F  | -3.438763000000 | 5.886935000000  | 3.365125000000  |
| F  | -1.252359000000 | 6.143465000000  | 3.312008000000  |
| C  | -4.991961000000 | -4.305820000000 | 2.523095000000  |
| F  | -5.348363000000 | -5.612870000000 | 2.490500000000  |
| F  | -5.800462000000 | -3.640099000000 | 1.629885000000  |
| F  | -5.283673000000 | -3.827005000000 | 3.758682000000  |
| C  | 0.036347000000  | -2.347848000000 | 4.458968000000  |
| H  | 0.843005000000  | -1.596195000000 | 4.465606000000  |
| H  | -0.875281000000 | -1.858898000000 | 4.070952000000  |
| C  | 0.456765000000  | -3.496684000000 | 3.538084000000  |
| C  | -0.233449000000 | -2.894864000000 | 5.884451000000  |
| H  | -1.292868000000 | -3.198463000000 | 5.969509000000  |
| H  | -0.078546000000 | -2.073167000000 | 6.607848000000  |
| C  | 2.022374000000  | -3.996008000000 | 5.491671000000  |
| H  | 2.498425000000  | -3.026993000000 | 5.727748000000  |
| H  | 2.722658000000  | -4.782999000000 | 5.825328000000  |
| C  | 0.684503000000  | -4.092930000000 | 6.240439000000  |
| H  | 0.187409000000  | -5.043982000000 | 5.964653000000  |
| H  | 0.849270000000  | -4.136322000000 | 7.331685000000  |
| C  | 1.813176000000  | -4.100405000000 | 3.959647000000  |
| H  | 1.859309000000  | -5.152609000000 | 3.621793000000  |
| H  | 2.628798000000  | -3.556752000000 | 3.448482000000  |
| H  | -0.337015000000 | -4.266637000000 | 3.545155000000  |
| F  | 4.585941000000  | 4.210835000000  | -3.500308000000 |
| F  | 3.843306000000  | 2.954403000000  | -5.137241000000 |
| F  | 2.608288000000  | 4.606578000000  | -4.376034000000 |
| F  | 4.007823000000  | -5.378783000000 | -3.553928000000 |
| F  | 3.561388000000  | -3.806561000000 | -5.015712000000 |
| F  | 5.125715000000  | -3.489680000000 | -3.499666000000 |
| H  | 3.576959000000  | 0.095361000000  | -2.211425000000 |

### Ag<sub>12</sub>-BpV

|   |                 |                 |                |
|---|-----------------|-----------------|----------------|
| C | 3.133368000000  | -2.767506000000 | 3.127525000000 |
| H | 4.218116000000  | -2.616609000000 | 2.978024000000 |
| C | 2.681668000000  | -2.005365000000 | 4.379298000000 |
| H | 1.581568000000  | -2.090267000000 | 4.471956000000 |
| H | 2.940206000000  | -0.936588000000 | 4.286879000000 |
| C | 3.348572000000  | -2.614965000000 | 5.628601000000 |
| H | 4.445834000000  | -2.458941000000 | 5.567073000000 |
| H | 3.003807000000  | -2.073497000000 | 6.528218000000 |
| C | 3.048845000000  | -4.117675000000 | 5.750097000000 |
| H | 3.556764000000  | -4.541818000000 | 6.635594000000 |
| H | 1.960375000000  | -4.255935000000 | 5.903869000000 |
| C | 3.478004000000  | -4.870731000000 | 4.480506000000 |
| H | 3.211808000000  | -5.941141000000 | 4.553902000000 |
| H | 4.580585000000  | -4.825854000000 | 4.378599000000 |
| C | 2.821578000000  | -4.265964000000 | 3.224780000000 |
| H | 3.165498000000  | -4.789614000000 | 2.313245000000 |
| H | 1.724000000000  | -4.386664000000 | 3.289138000000 |
| C | 0.906813000000  | 3.568168000000  | 3.071943000000 |
| H | -0.079748000000 | 4.066935000000  | 3.073971000000 |
| C | 1.014396000000  | 2.665510000000  | 4.305697000000 |
| H | 1.957102000000  | 2.089959000000  | 4.251781000000 |
| H | 0.170850000000  | 1.953280000000  | 4.320314000000 |
| C | 2.027140000000  | 4.612804000000  | 3.021859000000 |
| H | 1.915484000000  | 5.251386000000  | 2.127502000000 |

|    |                 |                 |                 |
|----|-----------------|-----------------|-----------------|
| H  | 3.001582000000  | 4.098442000000  | 2.932525000000  |
| C  | 4.713467000000  | 1.543924000000  | 2.546933000000  |
| C  | 5.613213000000  | 2.611301000000  | 3.238276000000  |
| C  | -1.421492000000 | -4.272289000000 | 3.450825000000  |
| C  | -3.220734000000 | 2.758094000000  | 2.823250000000  |
| C  | -4.328812000000 | 3.281832000000  | 3.792149000000  |
| C  | 0.432456000000  | -6.058293000000 | 0.676281000000  |
| H  | 0.477632000000  | -5.561267000000 | 1.649354000000  |
| C  | -0.731124000000 | -6.720939000000 | 0.278411000000  |
| H  | -1.583758000000 | -6.743590000000 | 0.962308000000  |
| C  | -0.793623000000 | -7.303679000000 | -1.004806000000 |
| C  | 0.382624000000  | -7.258349000000 | -1.785984000000 |
| H  | 0.402666000000  | -7.687918000000 | -2.792274000000 |
| C  | 1.499781000000  | -6.564348000000 | -1.311595000000 |
| H  | 2.399315000000  | -6.443772000000 | -1.925780000000 |
| C  | 4.356639000000  | 4.908284000000  | -2.040051000000 |
| H  | 3.393419000000  | 5.424684000000  | -2.079054000000 |
| C  | 5.320736000000  | 5.093427000000  | -3.032740000000 |
| H  | 5.117156000000  | 5.779077000000  | -3.860462000000 |
| C  | 6.543398000000  | 4.394704000000  | -2.956992000000 |
| C  | 6.742479000000  | 3.571916000000  | -1.829924000000 |
| H  | 7.664415000000  | 2.993778000000  | -1.716236000000 |
| C  | 5.724079000000  | 3.427021000000  | -0.884559000000 |
| H  | 5.822588000000  | 2.750580000000  | -0.028224000000 |
| C  | 6.492274000000  | -1.501238000000 | 1.841192000000  |
| H  | 6.527741000000  | -0.414187000000 | 1.960883000000  |
| C  | 7.081746000000  | -2.356412000000 | 2.774827000000  |
| H  | 7.609851000000  | -1.932510000000 | 3.633966000000  |
| C  | 6.336391000000  | -4.209535000000 | 1.437022000000  |
| H  | 6.219186000000  | -5.279315000000 | 1.240062000000  |
| C  | 5.771474000000  | -3.289806000000 | 0.549261000000  |
| H  | 5.239447000000  | -3.631429000000 | -0.345096000000 |
| C  | 6.987661000000  | -3.753221000000 | 2.600992000000  |
| C  | 1.003471000000  | 3.526376000000  | 5.584204000000  |
| H  | 0.017836000000  | 4.025182000000  | 5.678612000000  |
| H  | 1.111866000000  | 2.869911000000  | 6.466750000000  |
| C  | 2.119142000000  | 4.584309000000  | 5.558401000000  |
| H  | 2.079192000000  | 5.208180000000  | 6.469930000000  |
| H  | 3.103353000000  | 4.076876000000  | 5.554662000000  |
| C  | 2.011327000000  | 5.466598000000  | 4.304304000000  |
| H  | 2.840539000000  | 6.197992000000  | 4.268519000000  |
| H  | 1.069267000000  | 6.050502000000  | 4.341976000000  |
| Ag | 1.902646000000  | 0.365321000000  | 1.808423000000  |
| Ag | -0.054608000000 | -1.827837000000 | 1.943866000000  |
| Ag | -0.963725000000 | 0.937849000000  | 1.765066000000  |
| Ag | 2.189106000000  | -3.674465000000 | -0.312138000000 |
| Ag | 4.113434000000  | -0.617342000000 | 0.029442000000  |
| F  | -4.484777000000 | 4.636435000000  | 3.663872000000  |
| F  | -4.072912000000 | 3.023388000000  | 5.094158000000  |
| F  | -5.538410000000 | 2.711736000000  | 3.495015000000  |
| N  | 1.526331000000  | -5.932659000000 | -0.112209000000 |
| N  | 4.532611000000  | 4.065103000000  | -0.993891000000 |
| N  | 5.816982000000  | -1.950476000000 | 0.755233000000  |
| O  | 3.779479000000  | 1.055178000000  | 3.236659000000  |
| O  | -0.521517000000 | -3.423823000000 | 3.691512000000  |
| O  | -2.169247000000 | 2.328143000000  | 3.372728000000  |
| O  | 5.046826000000  | 1.307279000000  | 1.346222000000  |
| O  | -1.887092000000 | -4.682329000000 | 2.344574000000  |
| O  | -3.519671000000 | 2.841389000000  | 1.596225000000  |
| S  | 2.366433000000  | -2.064662000000 | 1.573168000000  |
| S  | -2.393075000000 | -1.089298000000 | 1.499513000000  |

|    |                 |                 |                 |
|----|-----------------|-----------------|-----------------|
| S  | 0.876940000000  | 2.597269000000  | 1.467910000000  |
| Ag | 2.699007000000  | 3.080643000000  | -0.119866000000 |
| C  | -2.095942000000 | -4.938161000000 | 4.686244000000  |
| C  | -2.762315000000 | -0.891315000000 | 4.324143000000  |
| H  | -2.561938000000 | 0.194348000000  | 4.261688000000  |
| H  | -1.793637000000 | -1.406913000000 | 4.446964000000  |
| C  | -3.440694000000 | -1.354725000000 | 3.030133000000  |
| C  | -3.682227000000 | -1.186593000000 | 5.526930000000  |
| H  | -3.796091000000 | -2.282704000000 | 5.637935000000  |
| H  | -3.198203000000 | -0.822876000000 | 6.451447000000  |
| C  | -5.724982000000 | -0.982514000000 | 4.036581000000  |
| H  | -6.695403000000 | -0.473649000000 | 3.888670000000  |
| H  | -5.939833000000 | -2.069514000000 | 4.078588000000  |
| C  | -5.066187000000 | -0.538452000000 | 5.352470000000  |
| H  | -5.717867000000 | -0.791562000000 | 6.208625000000  |
| H  | -4.956470000000 | 0.562711000000  | 5.348645000000  |
| C  | -4.810902000000 | -0.696609000000 | 2.830488000000  |
| H  | -5.275640000000 | -1.056809000000 | 1.896187000000  |
| H  | -4.677243000000 | 0.395614000000  | 2.722755000000  |
| H  | -3.564213000000 | -2.453615000000 | 3.055397000000  |
| C  | -2.745343000000 | 2.383827000000  | -3.126705000000 |
| H  | -3.501338000000 | 1.587494000000  | -3.243930000000 |
| C  | -1.924956000000 | 2.504485000000  | -4.412524000000 |
| H  | -1.102230000000 | 3.225738000000  | -4.267086000000 |
| H  | -1.475100000000 | 1.527663000000  | -4.657656000000 |
| C  | -2.838364000000 | 2.977898000000  | -5.560576000000 |
| H  | -3.599762000000 | 2.199758000000  | -5.766286000000 |
| H  | -2.236975000000 | 3.086642000000  | -6.481208000000 |
| C  | -3.534649000000 | 4.302552000000  | -5.208348000000 |
| H  | -4.196082000000 | 4.623372000000  | -6.033784000000 |
| H  | -2.766126000000 | 5.091237000000  | -5.084321000000 |
| C  | -4.337688000000 | 4.172832000000  | -3.903483000000 |
| H  | -4.804184000000 | 5.137618000000  | -3.631437000000 |
| H  | -5.164304000000 | 3.447173000000  | -4.046480000000 |
| C  | -3.441030000000 | 3.695424000000  | -2.743835000000 |
| H  | -4.031734000000 | 3.559891000000  | -1.819389000000 |
| H  | -2.671896000000 | 4.463194000000  | -2.531387000000 |
| C  | -0.429571000000 | -3.925091000000 | -3.041443000000 |
| H  | 0.180129000000  | -4.827565000000 | -2.857993000000 |
| C  | 0.076357000000  | -3.211198000000 | -4.298953000000 |
| H  | -0.457561000000 | -2.249951000000 | -4.408258000000 |
| H  | 1.154482000000  | -2.995336000000 | -4.203869000000 |
| C  | -1.906776000000 | -4.320299000000 | -3.142794000000 |
| H  | -2.213995000000 | -4.869429000000 | -2.233669000000 |
| H  | -2.519491000000 | -3.402239000000 | -3.186211000000 |
| C  | -3.255746000000 | -0.986553000000 | -3.957457000000 |
| C  | -4.414721000000 | -1.094006000000 | -4.987420000000 |
| C  | 0.956296000000  | 4.538741000000  | -2.693024000000 |
| C  | 3.956132000000  | -3.417129000000 | -2.895966000000 |
| C  | 5.272812000000  | -3.670189000000 | -3.689031000000 |
| C  | -0.203649000000 | 6.449041000000  | 0.712169000000  |
| H  | 0.509070000000  | 6.224717000000  | -0.089039000000 |
| C  | -0.030682000000 | 7.522695000000  | 1.587972000000  |
| H  | 0.832025000000  | 8.183316000000  | 1.461085000000  |
| C  | -0.963550000000 | 7.747372000000  | 2.622048000000  |
| C  | -2.073502000000 | 6.879883000000  | 2.681730000000  |
| H  | -2.829552000000 | 6.978377000000  | 3.465874000000  |
| C  | -2.184080000000 | 5.835758000000  | 1.762011000000  |
| H  | -3.024825000000 | 5.139644000000  | 1.791497000000  |
| C  | -4.762714000000 | -4.302900000000 | 1.299125000000  |
| H  | -4.171841000000 | -4.884573000000 | 2.013704000000  |

|    |                 |                 |                 |
|----|-----------------|-----------------|-----------------|
| C  | -6.073044000000 | -3.910612000000 | 1.585926000000  |
| H  | -6.524975000000 | -4.201929000000 | 2.538825000000  |
| C  | -6.762659000000 | -3.069611000000 | 0.687257000000  |
| C  | -6.095859000000 | -2.725030000000 | -0.505554000000 |
| H  | -6.576197000000 | -2.095189000000 | -1.259415000000 |
| C  | -4.790546000000 | -3.170422000000 | -0.724754000000 |
| H  | -4.250575000000 | -2.860836000000 | -1.624011000000 |
| C  | -5.979380000000 | 0.716254000000  | -1.789436000000 |
| H  | -5.342381000000 | 0.036870000000  | -2.366340000000 |
| C  | -7.265414000000 | 1.058941000000  | -2.213178000000 |
| H  | -7.639451000000 | 0.661698000000  | -3.161572000000 |
| C  | -7.467366000000 | 2.430529000000  | -0.246408000000 |
| H  | -8.030771000000 | 3.094407000000  | 0.416235000000  |
| C  | -6.171264000000 | 2.046766000000  | 0.107943000000  |
| H  | -5.682728000000 | 2.423976000000  | 1.011295000000  |
| C  | -8.052193000000 | 1.925950000000  | -1.426663000000 |
| C  | -0.188820000000 | -4.082095000000 | -5.544115000000 |
| H  | 0.421250000000  | -5.007237000000 | -5.487291000000 |
| H  | 0.148581000000  | -3.535828000000 | -6.443364000000 |
| C  | -1.674457000000 | -4.458147000000 | -5.665733000000 |
| H  | -1.837940000000 | -5.098020000000 | -6.552062000000 |
| H  | -2.270112000000 | -3.537177000000 | -5.819791000000 |
| C  | -2.161043000000 | -5.176265000000 | -4.396770000000 |
| H  | -3.238454000000 | -5.414969000000 | -4.463497000000 |
| H  | -1.631642000000 | -6.145122000000 | -4.291651000000 |
| Ag | -1.207488000000 | -0.685371000000 | -1.940975000000 |
| Ag | 0.696673000000  | 1.523632000000  | -2.094647000000 |
| Ag | 1.677121000000  | -1.228801000000 | -1.853624000000 |
| Ag | -1.109708000000 | 3.559319000000  | -0.089012000000 |
| Ag | -3.324001000000 | 0.621994000000  | -0.045181000000 |
| F  | 5.631094000000  | -4.974869000000 | -3.704851000000 |
| F  | 5.199528000000  | -3.242287000000 | -4.973127000000 |
| F  | 6.285112000000  | -2.970303000000 | -3.078523000000 |
| N  | -1.255087000000 | 5.598888000000  | 0.805804000000  |
| N  | -4.112387000000 | -3.929014000000 | 0.169843000000  |
| N  | -5.437908000000 | 1.189768000000  | -0.641324000000 |
| O  | -2.107793000000 | -0.743985000000 | -4.402900000000 |
| O  | 1.123128000000  | 3.529601000000  | -3.428171000000 |
| O  | 3.255896000000  | -2.452122000000 | -3.296337000000 |
| O  | -3.615728000000 | -1.126869000000 | -2.743279000000 |
| O  | 1.196468000000  | 4.688264000000  | -1.455338000000 |
| O  | 3.802569000000  | -4.186605000000 | -1.895600000000 |
| S  | -1.724629000000 | 1.789741000000  | -1.670320000000 |
| S  | 3.030605000000  | 0.852095000000  | -1.632213000000 |
| S  | -0.160761000000 | -2.905735000000 | -1.487152000000 |
| Ag | -1.805805000000 | -3.484922000000 | 0.274576000000  |
| F  | -5.128517000000 | 0.083507000000  | -4.992488000000 |
| F  | -5.291412000000 | -2.084477000000 | -4.660235000000 |
| F  | -3.985310000000 | -1.321055000000 | -6.246069000000 |
| C  | 0.358894000000  | 5.812701000000  | -3.363698000000 |
| F  | 1.246826000000  | 6.846377000000  | -3.287338000000 |
| F  | -0.781057000000 | 6.206637000000  | -2.712194000000 |
| F  | 0.034146000000  | 5.637047000000  | -4.665074000000 |
| C  | 3.243373000000  | 0.812231000000  | -4.460560000000 |
| H  | 2.968564000000  | -0.259041000000 | -4.442760000000 |
| H  | 2.314653000000  | 1.409867000000  | -4.494560000000 |
| C  | 4.031876000000  | 1.144104000000  | -3.188577000000 |
| C  | 4.112141000000  | 1.102043000000  | -5.700653000000 |
| H  | 4.318569000000  | 2.191144000000  | -5.753884000000 |
| H  | 3.544539000000  | 0.843405000000  | -6.612960000000 |
| C  | 6.213965000000  | 0.645618000000  | -4.359125000000 |

|   |                  |                 |                 |
|---|------------------|-----------------|-----------------|
| H | 7.137093000000   | 0.040272000000  | -4.301840000000 |
| H | 6.529216000000   | 1.708087000000  | -4.368315000000 |
| C | 5.439918000000   | 0.328958000000  | -5.648737000000 |
| H | 6.059012000000   | 0.570010000000  | -6.532273000000 |
| H | 5.231633000000   | -0.757075000000 | -5.684440000000 |
| C | 5.354837000000   | 0.375047000000  | -3.109101000000 |
| H | 5.905036000000   | 0.655371000000  | -2.192161000000 |
| H | 5.130898000000   | -0.703601000000 | -3.041998000000 |
| H | 4.222043000000   | 2.233326000000  | -3.152746000000 |
| F | -1.865061000000  | -6.277782000000 | 4.698572000000  |
| F | -1.6711116000000 | -4.427813000000 | 5.862504000000  |
| F | -3.455353000000  | -4.754069000000 | 4.628028000000  |
| F | 5.520850000000   | 3.806251000000  | 2.573336000000  |
| F | 5.280489000000   | 2.842502000000  | 4.529774000000  |
| F | 6.920429000000   | 2.227224000000  | 3.206982000000  |
| C | -0.776293000000  | 8.834430000000  | 3.610233000000  |
| C | -1.869904000000  | 9.550363000000  | 4.136769000000  |
| C | 0.507267000000   | 9.188065000000  | 4.073756000000  |
| C | -1.632019000000  | 10.562760000000 | 5.075009000000  |
| H | -2.890198000000  | 9.340099000000  | 3.800505000000  |
| C | 0.630096000000   | 10.214253000000 | 5.019115000000  |
| H | 1.394957000000   | 8.648546000000  | 3.728482000000  |
| H | -2.472292000000  | 11.135106000000 | 5.488500000000  |
| H | 1.621527000000   | 10.494856000000 | 5.397215000000  |
| C | -9.442239000000  | 2.268340000000  | -1.805285000000 |
| C | -10.300564000000 | 1.303060000000  | -2.369501000000 |
| C | -9.968218000000  | 3.559138000000  | -1.599257000000 |
| C | -11.613980000000 | 1.668313000000  | -2.692307000000 |
| H | -9.959146000000  | 0.274180000000  | -2.522782000000 |
| C | -11.295184000000 | 3.817270000000  | -1.966287000000 |
| H | -9.344080000000  | 4.357545000000  | -1.185117000000 |
| H | -12.299335000000 | 0.926794000000  | -3.122068000000 |
| H | -11.718732000000 | 4.819492000000  | -1.822606000000 |
| C | 7.516509000000   | -4.696645000000 | 3.612218000000  |
| C | 7.431787000000   | -4.408251000000 | 4.989939000000  |
| C | 8.098464000000   | -5.926542000000 | 3.246302000000  |
| C | 7.917995000000   | -5.344155000000 | 5.911722000000  |
| H | 6.961673000000   | -3.483269000000 | 5.339962000000  |
| C | 8.558360000000   | -6.786335000000 | 4.252130000000  |
| H | 8.214885000000   | -6.199033000000 | 2.192487000000  |
| H | 7.849099000000   | -5.140050000000 | 6.987879000000  |
| H | 9.021354000000   | -7.744637000000 | 3.984212000000  |
| C | -2.056074000000  | -7.861577000000 | -1.532345000000 |
| C | -3.297154000000  | -7.268935000000 | -1.214660000000 |
| C | -2.075905000000  | -8.970355000000 | -2.407308000000 |
| C | -4.462481000000  | -7.788613000000 | -1.784729000000 |
| H | -3.340103000000  | -6.386403000000 | -0.566341000000 |
| H | -1.138343000000  | -9.486942000000 | -2.653634000000 |
| C | -4.354503000000  | -8.884424000000 | -2.655275000000 |
| H | -5.438092000000  | -7.340469000000 | -1.571194000000 |
| H | -5.247811000000  | -9.306391000000 | -3.133004000000 |
| C | -8.099471000000  | -2.518385000000 | 1.006826000000  |
| C | -8.442049000000  | -1.202782000000 | 0.632065000000  |
| C | -9.068122000000  | -3.259516000000 | 1.711104000000  |
| C | -9.708171000000  | -0.706860000000 | 0.967144000000  |
| H | -7.721857000000  | -0.565096000000 | 0.111829000000  |
| C | -10.305598000000 | -2.665278000000 | 1.992579000000  |
| H | -8.871612000000  | -4.292891000000 | 2.014601000000  |
| H | -9.987697000000  | 0.316065000000  | 0.682886000000  |
| H | -11.074330000000 | -3.231382000000 | 2.534081000000  |
| C | 7.556087000000   | 4.486797000000  | -4.033233000000 |

|   |                  |                 |                 |
|---|------------------|-----------------|-----------------|
| C | 7.171521000000   | 4.546263000000  | -5.388315000000 |
| C | 8.936970000000   | 4.488005000000  | -3.753913000000 |
| C | 8.164886000000   | 4.600314000000  | -6.374462000000 |
| H | 6.113957000000   | 4.515451000000  | -5.670638000000 |
| C | 9.844868000000   | 4.551891000000  | -4.818716000000 |
| H | 9.298375000000   | 4.464657000000  | -2.720826000000 |
| H | 7.883245000000   | 4.635518000000  | -7.434619000000 |
| H | 10.924036000000  | 4.562369000000  | -4.618956000000 |
| N | -0.409439000000  | 10.905664000000 | 5.524420000000  |
| N | -12.122781000000 | 2.900936000000  | -2.504362000000 |
| N | -10.642498000000 | -1.410873000000 | 1.635424000000  |
| N | 8.477665000000   | -6.520583000000 | 5.570152000000  |
| N | -3.186255000000  | -9.480312000000 | -2.963580000000 |
| N | 9.486753000000   | 4.606068000000  | -6.116027000000 |

### Ag<sub>12</sub>-BPA

|   |                 |                 |                 |
|---|-----------------|-----------------|-----------------|
| C | -3.060985000000 | 2.574320000000  | -3.293295000000 |
| H | -2.707091000000 | 3.613999000000  | -3.169918000000 |
| C | -2.407886000000 | 1.959990000000  | -4.536614000000 |
| H | -2.655611000000 | 0.882993000000  | -4.580955000000 |
| H | -1.310775000000 | 2.061691000000  | -4.464084000000 |
| C | -2.925353000000 | 2.659184000000  | -5.808422000000 |
| H | -2.589592000000 | 3.715820000000  | -5.807927000000 |
| H | -2.471238000000 | 2.181858000000  | -6.695982000000 |
| C | -4.459594000000 | 2.604401000000  | -5.889249000000 |
| H | -4.817155000000 | 3.120820000000  | -6.798974000000 |
| H | -4.783410000000 | 1.547454000000  | -5.967721000000 |
| C | -5.095226000000 | 3.228542000000  | -4.636775000000 |
| H | -6.197912000000 | 3.160245000000  | -4.680210000000 |
| H | -4.842064000000 | 4.307535000000  | -4.590968000000 |
| C | -4.592122000000 | 2.534094000000  | -3.356824000000 |
| H | -5.024272000000 | 3.012825000000  | -2.459476000000 |
| H | -4.930450000000 | 1.481460000000  | -3.353274000000 |
| C | 3.490174000000  | 1.856264000000  | -2.825503000000 |
| H | 4.122458000000  | 0.952618000000  | -2.892822000000 |
| C | 2.671462000000  | 1.995997000000  | -4.111553000000 |
| H | 1.951827000000  | 2.828764000000  | -4.005865000000 |
| H | 2.095219000000  | 1.070069000000  | -4.282262000000 |
| C | 4.362098000000  | 3.086282000000  | -2.555844000000 |
| H | 4.947499000000  | 2.947174000000  | -1.628916000000 |
| H | 3.703654000000  | 3.960912000000  | -2.400976000000 |
| C | 0.311884000000  | 4.877200000000  | -2.487829000000 |
| C | 0.760639000000  | 6.103481000000  | -3.341416000000 |
| C | -4.263015000000 | -1.538367000000 | -3.141915000000 |
| C | 3.786236000000  | -1.869407000000 | -3.148497000000 |
| C | 4.768773000000  | -2.643258000000 | -4.076384000000 |
| C | -6.629400000000 | -1.312703000000 | 0.206537000000  |
| H | -6.119567000000 | -1.857117000000 | -0.595578000000 |
| C | -7.635131000000 | -1.903438000000 | 0.979656000000  |
| H | -7.923725000000 | -2.945159000000 | 0.782946000000  |
| C | -8.243796000000 | -1.159839000000 | 2.009542000000  |
| C | -7.813078000000 | 0.168430000000  | 2.188246000000  |
| H | -8.249821000000 | 0.801672000000  | 2.968282000000  |
| C | -6.798467000000 | 0.686542000000  | 1.380632000000  |
| H | -6.424791000000 | 1.704873000000  | 1.515736000000  |
| C | 4.813734000000  | 4.853283000000  | 0.707841000000  |

|    |                 |                 |                 |
|----|-----------------|-----------------|-----------------|
| H  | 4.871352000000  | 4.080794000000  | 1.480585000000  |
| C  | 5.965913000000  | 5.453439000000  | 0.190399000000  |
| H  | 6.935173000000  | 5.157342000000  | 0.597166000000  |
| C  | 5.862536000000  | 6.367794000000  | -0.872714000000 |
| C  | 4.559671000000  | 6.708585000000  | -1.289292000000 |
| H  | 4.400270000000  | 7.433305000000  | -2.094984000000 |
| C  | 3.453707000000  | 6.088770000000  | -0.705154000000 |
| H  | 2.431643000000  | 6.317644000000  | -1.019707000000 |
| C  | -2.446875000000 | 6.537047000000  | -0.789798000000 |
| H  | -1.353352000000 | 6.591015000000  | -0.763188000000 |
| C  | -3.235600000000 | 7.649620000000  | -1.097542000000 |
| H  | -2.754596000000 | 8.616629000000  | -1.280620000000 |
| C  | -5.172799000000 | 6.240132000000  | -0.940134000000 |
| H  | -6.251871000000 | 6.068368000000  | -0.991107000000 |
| C  | -4.325263000000 | 5.184228000000  | -0.598231000000 |
| H  | -4.714237000000 | 4.197693000000  | -0.331704000000 |
| C  | -4.635251000000 | 7.520720000000  | -1.170203000000 |
| C  | 3.613369000000  | 2.260707000000  | -5.302000000000 |
| H  | 4.255160000000  | 1.370990000000  | -5.462029000000 |
| H  | 3.014046000000  | 2.388068000000  | -6.221851000000 |
| C  | 4.493511000000  | 3.498512000000  | -5.059103000000 |
| H  | 5.178101000000  | 3.658625000000  | -5.912403000000 |
| H  | 3.844785000000  | 4.393690000000  | -4.991571000000 |
| C  | 5.292259000000  | 3.360137000000  | -3.752470000000 |
| H  | 5.877682000000  | 4.279603000000  | -3.555087000000 |
| H  | 6.021548000000  | 2.529959000000  | -3.848393000000 |
| Ag | 0.015281000000  | 1.865420000000  | -1.761554000000 |
| Ag | -1.540474000000 | -0.529871000000 | -2.215300000000 |
| Ag | 1.363915000000  | -0.688854000000 | -1.872190000000 |
| Ag | -4.201982000000 | 0.604251000000  | -0.351928000000 |
| Ag | -1.699736000000 | 3.528509000000  | -0.001563000000 |
| F  | 6.016188000000  | -2.074745000000 | -4.020178000000 |
| F  | 4.392416000000  | -2.660957000000 | -5.376337000000 |
| F  | 4.899184000000  | -3.943978000000 | -3.673116000000 |
| N  | -6.199716000000 | -0.042152000000 | 0.407987000000  |
| N  | 3.572480000000  | 5.135900000000  | 0.251120000000  |
| N  | -2.981880000000 | 5.323589000000  | -0.521359000000 |
| O  | -0.007468000000 | 3.862777000000  | -3.169097000000 |
| O  | -3.245881000000 | -1.233847000000 | -3.821731000000 |
| O  | 2.819832000000  | -1.292690000000 | -3.723865000000 |
| O  | 0.362211000000  | 5.031407000000  | -1.233273000000 |
| O  | -4.349365000000 | -1.878917000000 | -1.923562000000 |
| O  | 4.081183000000  | -1.919669000000 | -1.922770000000 |
| S  | -2.489130000000 | 1.731692000000  | -1.717843000000 |
| S  | -0.219951000000 | -2.596509000000 | -1.808722000000 |
| S  | 2.428294000000  | 1.517934000000  | -1.317863000000 |
| Ag | 2.033520000000  | 3.480513000000  | 0.289879000000  |
| C  | -5.642505000000 | -1.467302000000 | -3.862636000000 |
| C  | -0.084850000000 | -2.731571000000 | -4.629961000000 |
| H  | 0.804252000000  | -2.077721000000 | -4.567079000000 |
| H  | -0.983965000000 | -2.091047000000 | -4.671133000000 |
| C  | -0.138084000000 | -3.614751000000 | -3.377358000000 |
| C  | 0.013544000000  | -3.605131000000 | -5.896024000000 |
| H  | -0.918883000000 | -4.194396000000 | -6.013311000000 |
| H  | 0.087838000000  | -2.950610000000 | -6.783546000000 |
| C  | 1.141794000000  | -5.442222000000 | -4.569272000000 |
| H  | 2.026304000000  | -6.102333000000 | -4.500693000000 |

|   |                 |                 |                 |
|---|-----------------|-----------------|-----------------|
| H | 0.254058000000  | -6.103722000000 | -4.636978000000 |
| C | 1.217361000000  | -4.558634000000 | -5.824918000000 |
| H | 1.263476000000  | -5.188877000000 | -6.732155000000 |
| H | 2.151290000000  | -3.964834000000 | -5.795939000000 |
| C | 1.044419000000  | -4.588403000000 | -3.290503000000 |
| H | 0.939801000000  | -5.231777000000 | -2.396845000000 |
| H | 1.977534000000  | -4.009056000000 | -3.161401000000 |
| H | -1.090444000000 | -4.178988000000 | -3.356817000000 |
| C | 2.840325000000  | -2.138617000000 | 3.184554000000  |
| H | 2.738883000000  | -3.226521000000 | 3.011788000000  |
| C | 2.004442000000  | -1.729102000000 | 4.404118000000  |
| H | 2.005854000000  | -0.624919000000 | 4.481642000000  |
| H | 0.962262000000  | -2.065951000000 | 4.265789000000  |
| C | 2.599632000000  | -2.328590000000 | 5.692093000000  |
| H | 2.515331000000  | -3.433823000000 | 5.658044000000  |
| H | 2.003055000000  | -1.992359000000 | 6.559768000000  |
| C | 4.074020000000  | -1.929288000000 | 5.861308000000  |
| H | 4.493625000000  | -2.378150000000 | 6.780218000000  |
| H | 4.144980000000  | -0.829883000000 | 5.974127000000  |
| C | 4.899176000000  | -2.356291000000 | 4.637228000000  |
| H | 5.952581000000  | -2.038646000000 | 4.749277000000  |
| H | 4.905384000000  | -3.463506000000 | 4.565503000000  |
| C | 4.320187000000  | -1.763337000000 | 3.338280000000  |
| H | 4.893882000000  | -2.110704000000 | 2.459445000000  |
| H | 4.410783000000  | -0.662558000000 | 3.369328000000  |
| C | -3.643886000000 | -1.447470000000 | 2.794204000000  |
| H | -4.394184000000 | -0.636186000000 | 2.836310000000  |
| C | -2.744270000000 | -1.370372000000 | 4.033542000000  |
| H | -1.930648000000 | -2.113718000000 | 3.933381000000  |
| H | -2.290680000000 | -0.365604000000 | 4.103342000000  |
| C | -4.339014000000 | -2.806668000000 | 2.673542000000  |
| H | -4.990149000000 | -2.820027000000 | 1.782301000000  |
| H | -3.574399000000 | -3.590857000000 | 2.532172000000  |
| C | -0.515762000000 | -4.705704000000 | 2.210359000000  |
| C | -1.414924000000 | -5.825534000000 | 2.830574000000  |
| C | 3.722651000000  | 2.073751000000  | 3.325815000000  |
| C | -4.060778000000 | 2.666977000000  | 2.567647000000  |
| C | -4.877196000000 | 3.718233000000  | 3.382508000000  |
| C | 6.606088000000  | 0.876688000000  | 0.941104000000  |
| H | 5.965236000000  | 1.590975000000  | 1.467523000000  |
| C | 7.985478000000  | 0.832260000000  | 1.143606000000  |
| H | 8.447055000000  | 1.541432000000  | 1.838265000000  |
| C | 8.763353000000  | -0.133752000000 | 0.473927000000  |
| C | 8.100232000000  | -0.974079000000 | -0.436446000000 |
| H | 8.650255000000  | -1.732079000000 | -1.007358000000 |
| C | 6.714483000000  | -0.865819000000 | -0.595383000000 |
| H | 6.158662000000  | -1.509650000000 | -1.285677000000 |
| C | -4.203962000000 | -5.044947000000 | -1.882634000000 |
| H | -4.681413000000 | -4.108399000000 | -2.185135000000 |
| C | -4.779075000000 | -6.283808000000 | -2.166562000000 |
| H | -5.733394000000 | -6.322109000000 | -2.700380000000 |
| C | -4.181004000000 | -7.460302000000 | -1.679590000000 |
| C | -2.948983000000 | -7.325147000000 | -1.015736000000 |
| H | -2.421222000000 | -8.202577000000 | -0.626204000000 |
| C | -2.418110000000 | -6.051904000000 | -0.786847000000 |
| H | -1.480970000000 | -5.907858000000 | -0.236757000000 |
| C | 3.084671000000  | -5.906144000000 | 0.541886000000  |



|    |                 |                 |                 |
|----|-----------------|-----------------|-----------------|
| H  | 2.057247000000  | -6.285762000000 | 0.547471000000  |
| C  | 4.181912000000  | -6.731610000000 | 0.807988000000  |
| H  | 4.021311000000  | -7.798731000000 | 0.996810000000  |
| C  | 5.599214000000  | -4.806203000000 | 0.600886000000  |
| H  | 6.575815000000  | -4.315064000000 | 0.621245000000  |
| C  | 4.459006000000  | -4.053995000000 | 0.311410000000  |
| H  | 4.526310000000  | -2.991103000000 | 0.069565000000  |
| C  | 5.481561000000  | -6.189774000000 | 0.837836000000  |
| C  | -3.563511000000 | -1.672746000000 | 5.302744000000  |
| H  | -4.318649000000 | -0.874155000000 | 5.448825000000  |
| H  | -2.896406000000 | -1.643960000000 | 6.183734000000  |
| C  | -4.265498000000 | -3.036619000000 | 5.200643000000  |
| H  | -4.866414000000 | -3.230371000000 | 6.108223000000  |
| H  | -3.500686000000 | -3.836126000000 | 5.140752000000  |
| C  | -5.153365000000 | -3.103300000000 | 3.947678000000  |
| H  | -5.625577000000 | -4.100395000000 | 3.864356000000  |
| H  | -5.978782000000 | -2.367223000000 | 4.032255000000  |
| Ag | -0.313303000000 | -1.517772000000 | 1.609867000000  |
| Ag | 1.292149000000  | 0.884667000000  | 2.133624000000  |
| Ag | -1.575169000000 | 1.085150000000  | 1.712390000000  |
| Ag | 3.730084000000  | -0.099928000000 | 0.145712000000  |
| Ag | 1.395248000000  | -3.247651000000 | -0.044278000000 |
| F  | -6.222676000000 | 3.541140000000  | 3.197271000000  |
| F  | -4.646088000000 | 3.674680000000  | 4.715875000000  |
| F  | -4.578820000000 | 4.988268000000  | 2.961372000000  |
| N  | 5.967944000000  | 0.023900000000  | 0.101631000000  |
| N  | -3.057124000000 | -4.922718000000 | -1.174226000000 |
| N  | 3.216959000000  | -4.586609000000 | 0.278240000000  |
| O  | -0.439486000000 | -3.643895000000 | 2.885636000000  |
| O  | 2.710233000000  | 1.667095000000  | 3.963785000000  |
| O  | -3.307315000000 | 1.908075000000  | 3.238375000000  |
| O  | -0.020824000000 | -4.997948000000 | 1.081979000000  |
| O  | 3.886617000000  | 2.197829000000  | 2.077775000000  |
| O  | -4.253954000000 | 2.722625000000  | 1.319453000000  |
| S  | 2.170715000000  | -1.377579000000 | 1.610511000000  |
| S  | 0.027475000000  | 2.994009000000  | 1.717231000000  |
| S  | -2.715935000000 | -1.069419000000 | 1.210274000000  |
| Ag | -2.442986000000 | -2.876055000000 | -0.447882000000 |
| F  | -1.560432000000 | -5.710557000000 | 4.171845000000  |
| F  | -0.947658000000 | -7.072976000000 | 2.566258000000  |
| F  | -2.682247000000 | -5.754716000000 | 2.284369000000  |
| C  | 4.952233000000  | 2.414157000000  | 4.222243000000  |
| F  | 5.943973000000  | 3.055962000000  | 3.530263000000  |
| F  | 5.504232000000  | 1.264513000000  | 4.719988000000  |
| F  | 4.618720000000  | 3.201301000000  | 5.271849000000  |
| C  | -0.432027000000 | 3.114901000000  | 4.507773000000  |
| H  | -1.427514000000 | 2.670581000000  | 4.321756000000  |
| H  | 0.297380000000  | 2.293862000000  | 4.623958000000  |
| C  | -0.037070000000 | 3.982114000000  | 3.308280000000  |
| C  | -0.481549000000 | 3.974439000000  | 5.786193000000  |
| H  | 0.539237000000  | 4.335002000000  | 6.026243000000  |
| H  | -0.802428000000 | 3.344188000000  | 6.635599000000  |
| C  | -1.020089000000 | 6.031599000000  | 4.407460000000  |
| H  | -1.727516000000 | 6.869661000000  | 4.265496000000  |
| H  | -0.024253000000 | 6.483034000000  | 4.592012000000  |
| C  | -1.426587000000 | 5.175671000000  | 5.618190000000  |
| H  | -1.431982000000 | 5.792099000000  | 6.535922000000  |

|   |                  |                 |                 |
|---|------------------|-----------------|-----------------|
| H | -2.459982000000  | 4.807479000000  | 5.470662000000  |
| C | -0.964977000000  | 5.187443000000  | 3.119240000000  |
| H | -0.625082000000  | 5.797786000000  | 2.262067000000  |
| H | -1.981539000000  | 4.825928000000  | 2.874025000000  |
| H | 1.008570000000   | 4.322987000000  | 3.427754000000  |
| F | -6.440131000000  | -0.529350000000 | -3.258242000000 |
| F | -5.555359000000  | -1.136478000000 | -5.171168000000 |
| F | -6.294171000000  | -2.663855000000 | -3.775678000000 |
| F | 2.072266000000   | 5.947039000000  | -3.720682000000 |
| F | 0.024449000000   | 6.256294000000  | -4.466154000000 |
| F | 0.692710000000   | 7.274375000000  | -2.642993000000 |
| C | -5.524155000000  | 8.720124000000  | -1.390380000000 |
| H | -4.960487000000  | 9.516639000000  | -1.907540000000 |
| H | -6.379823000000  | 8.449048000000  | -2.034980000000 |
| C | -6.074840000000  | 9.295747000000  | -0.047174000000 |
| H | -6.588268000000  | 10.247991000000 | -0.272400000000 |
| H | -5.222776000000  | 9.530313000000  | 0.615810000000  |
| C | 7.059875000000   | 6.947837000000  | -1.601144000000 |
| H | 7.132755000000   | 6.448673000000  | -2.588475000000 |
| H | 6.847225000000   | 8.006545000000  | -1.837604000000 |
| C | 8.419413000000   | 6.882689000000  | -0.885695000000 |
| H | 9.136027000000   | 7.485318000000  | -1.477573000000 |
| H | 8.341010000000   | 7.394605000000  | 0.091669000000  |
| C | 10.231733000000  | -0.292028000000 | 0.781621000000  |
| H | 10.688164000000  | -1.006661000000 | 0.074089000000  |
| H | 10.728837000000  | 0.687083000000  | 0.645660000000  |
| C | 10.471838000000  | -0.785790000000 | 2.238883000000  |
| H | 11.559650000000  | -0.789980000000 | 2.430413000000  |
| H | 10.023895000000  | -0.057990000000 | 2.939957000000  |
| C | 6.696056000000   | -7.061505000000 | 1.043749000000  |
| H | 6.396790000000   | -8.004124000000 | 1.535711000000  |
| H | 7.423454000000   | -6.553853000000 | 1.705624000000  |
| C | 7.398456000000   | -7.418667000000 | -0.305502000000 |
| H | 8.162637000000   | -8.188050000000 | -0.092737000000 |
| H | 6.658750000000   | -7.869884000000 | -0.991055000000 |
| C | -4.934809000000  | -8.767071000000 | -1.698942000000 |
| H | -5.666294000000  | -8.767735000000 | -2.526165000000 |
| H | -4.254733000000  | -9.623425000000 | -1.853472000000 |
| C | -5.694403000000  | -8.967355000000 | -0.344534000000 |
| H | -6.351356000000  | -9.850731000000 | -0.439682000000 |
| H | -4.956352000000  | -9.187056000000 | 0.447032000000  |
| C | -9.348519000000  | -1.734426000000 | 2.863271000000  |
| C | -7.030457000000  | 8.347525000000  | 0.640108000000  |
| C | -6.607673000000  | 7.448611000000  | 1.635520000000  |
| C | -8.378196000000  | 8.268544000000  | 0.242071000000  |
| C | -7.522893000000  | 6.523049000000  | 2.159652000000  |
| H | -5.570662000000  | 7.447881000000  | 1.987440000000  |
| C | -9.214775000000  | 7.313743000000  | 0.834929000000  |
| H | -8.771799000000  | 8.943231000000  | -0.527380000000 |
| H | -7.194670000000  | 5.795086000000  | 2.909206000000  |
| H | -10.269025000000 | 7.244454000000  | 0.535521000000  |
| C | 9.040233000000   | 5.513112000000  | -0.664962000000 |
| C | 9.968226000000   | 5.333977000000  | 0.378899000000  |
| C | 8.756628000000   | 4.385113000000  | -1.457061000000 |
| C | 10.551850000000  | 4.077974000000  | 0.579550000000  |
| H | 10.227652000000  | 6.169698000000  | 1.038536000000  |
| C | 9.385731000000   | 3.165629000000  | -1.166857000000 |

|   |                  |                 |                 |
|---|------------------|-----------------|-----------------|
| H | 8.033279000000   | 4.430746000000  | -2.277441000000 |
| H | 11.275109000000  | 3.929591000000  | 1.391858000000  |
| H | 9.152374000000   | 2.272088000000  | -1.759653000000 |
| C | 9.902734000000   | -2.162653000000 | 2.500011000000  |
| C | 8.539446000000   | -2.364607000000 | 2.793892000000  |
| C | 10.708135000000  | -3.313272000000 | 2.423905000000  |
| C | 8.059566000000   | -3.669299000000 | 2.968503000000  |
| H | 7.853590000000   | -1.515381000000 | 2.882272000000  |
| C | 10.132701000000  | -4.574870000000 | 2.624749000000  |
| H | 11.780060000000  | -3.226591000000 | 2.212173000000  |
| H | 6.998172000000   | -3.837765000000 | 3.188677000000  |
| H | 10.756449000000  | -5.477453000000 | 2.575084000000  |
| C | 8.051294000000   | -6.218627000000 | -0.950568000000 |
| C | 7.419834000000   | -5.463463000000 | -1.954956000000 |
| C | 9.297198000000   | -5.752026000000 | -0.492985000000 |
| C | 8.030750000000   | -4.289321000000 | -2.418761000000 |
| H | 6.445564000000   | -5.760798000000 | -2.356054000000 |
| C | 9.822379000000   | -4.565066000000 | -1.014863000000 |
| H | 9.838620000000   | -6.296161000000 | 0.287700000000  |
| H | 7.534898000000   | -3.678195000000 | -3.179480000000 |
| H | 10.779740000000  | -4.176870000000 | -0.643914000000 |
| C | -6.491285000000  | -7.737751000000 | 0.031481000000  |
| C | -5.996517000000  | -6.804152000000 | 0.959928000000  |
| C | -7.687989000000  | -7.405861000000 | -0.629860000000 |
| C | -6.687544000000  | -5.600771000000 | 1.153360000000  |
| H | -5.058866000000  | -6.986485000000 | 1.496311000000  |
| C | -8.302067000000  | -6.171843000000 | -0.374693000000 |
| H | -8.128048000000  | -8.090316000000 | -1.364492000000 |
| H | -6.300441000000  | -4.853256000000 | 1.856407000000  |
| H | -9.218807000000  | -5.883256000000 | -0.903742000000 |
| N | -8.812142000000  | 6.437827000000  | 1.776705000000  |
| N | 10.275260000000  | 2.992785000000  | -0.169211000000 |
| N | 8.826102000000   | -4.776085000000 | 2.882832000000  |
| N | 9.209667000000   | -3.821643000000 | -1.958152000000 |
| N | -7.817246000000  | -5.265304000000 | 0.499737000000  |
| H | -9.358749000000  | -1.223353000000 | 3.842521000000  |
| C | -10.758317000000 | -1.574200000000 | 2.214089000000  |
| H | -11.516431000000 | -1.789994000000 | 2.988207000000  |
| H | -10.894028000000 | -0.521608000000 | 1.906940000000  |
| C | -10.958046000000 | -2.502214000000 | 1.039770000000  |
| C | -11.415530000000 | -3.817626000000 | 1.236860000000  |
| C | -10.632671000000 | -2.131552000000 | -0.277099000000 |
| C | -11.512063000000 | -4.682999000000 | 0.141855000000  |
| H | -11.688592000000 | -4.166450000000 | 2.239367000000  |
| C | -10.748210000000 | -3.079768000000 | -1.303663000000 |
| H | -10.274149000000 | -1.121065000000 | -0.500165000000 |
| H | -11.867797000000 | -5.712121000000 | 0.282828000000  |
| H | -10.475942000000 | -2.810747000000 | -2.332384000000 |
| N | -11.177039000000 | -4.343973000000 | -1.119437000000 |
| H | -9.163630000000  | -2.807438000000 | 3.049954000000  |

Ag<sub>12</sub>-Azopy

|   |                |                 |                |
|---|----------------|-----------------|----------------|
| C | 3.835220000000 | -0.017295000000 | 3.025883000000 |
| H | 4.326239000000 | 0.935043000000  | 2.757695000000 |
| C | 3.049366000000 | 0.161495000000  | 4.326820000000 |

|   |                 |                 |                 |
|---|-----------------|-----------------|-----------------|
| H | 2.470871000000  | -0.753196000000 | 4.544020000000  |
| H | 2.334648000000  | 0.994559000000  | 4.215340000000  |
| C | 4.026661000000  | 0.451933000000  | 5.483071000000  |
| H | 4.525213000000  | 1.424539000000  | 5.302321000000  |
| H | 3.453991000000  | 0.556404000000  | 6.422421000000  |
| C | 5.083048000000  | -0.657475000000 | 5.613000000000  |
| H | 5.785268000000  | -0.427677000000 | 6.435279000000  |
| H | 4.577217000000  | -1.607205000000 | 5.874694000000  |
| C | 5.852662000000  | -0.840363000000 | 4.295232000000  |
| H | 6.580835000000  | -1.668649000000 | 4.375954000000  |
| H | 6.438365000000  | 0.075185000000  | 4.077482000000  |
| C | 4.890899000000  | -1.124679000000 | 3.123097000000  |
| H | 5.447830000000  | -1.211961000000 | 2.173042000000  |
| H | 4.380550000000  | -2.091424000000 | 3.293719000000  |
| C | -0.260830000000 | 4.956020000000  | 1.121194000000  |
| H | -1.141662000000 | 5.485747000000  | 0.716682000000  |
| C | -0.417939000000 | 4.801091000000  | 2.637100000000  |
| H | 0.401908000000  | 4.169930000000  | 3.025046000000  |
| H | -1.373943000000 | 4.299981000000  | 2.865808000000  |
| C | 1.014024000000  | 5.710993000000  | 0.724332000000  |
| H | 1.049187000000  | 5.843341000000  | -0.373658000000 |
| H | 1.892575000000  | 5.099517000000  | 0.999236000000  |
| C | 3.387351000000  | 3.463157000000  | 2.515065000000  |
| C | 4.524632000000  | 4.260192000000  | 3.210901000000  |
| C | 0.740332000000  | -3.203097000000 | 4.124334000000  |
| C | -4.255331000000 | 2.714876000000  | 2.067378000000  |
| C | -5.555069000000 | 3.060011000000  | 2.853970000000  |
| C | 2.299526000000  | -5.757938000000 | 1.551611000000  |
| H | 1.729502000000  | -5.347532000000 | 2.392192000000  |
| C | 2.071995000000  | -7.056875000000 | 1.087230000000  |
| H | 1.335397000000  | -7.703828000000 | 1.571371000000  |
| C | 2.734396000000  | -7.490855000000 | -0.075167000000 |
| C | 3.703873000000  | -6.647067000000 | -0.656413000000 |
| H | 4.258556000000  | -6.966552000000 | -1.541538000000 |
| C | 3.900705000000  | -5.384203000000 | -0.101415000000 |
| H | 4.627482000000  | -4.687218000000 | -0.525501000000 |
| C | 3.201015000000  | 4.407447000000  | -3.815508000000 |
| H | 2.329705000000  | 4.664168000000  | -4.428349000000 |
| C | 4.431766000000  | 4.077022000000  | -4.391499000000 |
| H | 4.571019000000  | 4.070425000000  | -5.476130000000 |
| C | 5.473490000000  | 3.648300000000  | -3.546975000000 |
| C | 5.284787000000  | 3.708408000000  | -2.151423000000 |
| H | 6.087778000000  | 3.417390000000  | -1.470648000000 |
| C | 4.033744000000  | 4.086308000000  | -1.665876000000 |
| H | 3.833690000000  | 4.094813000000  | -0.589283000000 |
| C | 6.273400000000  | 1.578766000000  | 0.897220000000  |
| H | 5.529899000000  | 2.374432000000  | 1.022984000000  |
| C | 7.418117000000  | 1.523932000000  | 1.688708000000  |
| H | 7.603818000000  | 2.281168000000  | 2.453196000000  |
| C | 8.033384000000  | -0.497085000000 | 0.503051000000  |
| H | 8.720177000000  | -1.331478000000 | 0.334873000000  |
| C | 6.848689000000  | -0.382004000000 | -0.229160000000 |
| H | 6.560358000000  | -1.126132000000 | -0.974653000000 |
| C | 8.311969000000  | 0.448758000000  | 1.507161000000  |
| C | -0.360437000000 | 6.187205000000  | 3.310509000000  |
| H | -1.231470000000 | 6.793455000000  | 2.985961000000  |
| H | -0.451112000000 | 6.061371000000  | 4.404593000000  |

|    |                 |                 |                 |
|----|-----------------|-----------------|-----------------|
| C  | 0.937674000000  | 6.930134000000  | 2.955630000000  |
| H  | 0.954840000000  | 7.925621000000  | 3.436379000000  |
| H  | 1.801432000000  | 6.364103000000  | 3.356871000000  |
| C  | 1.081858000000  | 7.077854000000  | 1.432429000000  |
| H  | 2.038233000000  | 7.570763000000  | 1.175306000000  |
| H  | 0.274854000000  | 7.730722000000  | 1.043416000000  |
| Ag | 1.464774000000  | 1.825749000000  | 1.159098000000  |
| Ag | 0.345383000000  | -0.653937000000 | 2.169174000000  |
| Ag | -1.443600000000 | 1.542333000000  | 1.547277000000  |
| Ag | 2.694826000000  | -2.718380000000 | 0.902586000000  |
| Ag | 3.858794000000  | 0.460402000000  | -0.709535000000 |
| F  | -6.226529000000 | 4.080574000000  | 2.242322000000  |
| F  | -5.331633000000 | 3.421053000000  | 4.136083000000  |
| F  | -6.394458000000 | 1.976616000000  | 2.871991000000  |
| N  | 3.179448000000  | -4.917017000000 | 0.951838000000  |
| N  | 2.984523000000  | 4.380098000000  | -2.478546000000 |
| N  | 5.972609000000  | 0.632509000000  | -0.031457000000 |
| O  | 2.401129000000  | 3.140352000000  | 3.220701000000  |
| O  | 0.454505000000  | -1.983525000000 | 4.260637000000  |
| O  | -3.173852000000 | 2.790654000000  | 2.709600000000  |
| O  | 3.603591000000  | 3.173940000000  | 1.292218000000  |
| O  | 0.261605000000  | -4.065134000000 | 3.326016000000  |
| O  | -4.460689000000 | 2.386510000000  | 0.858910000000  |
| S  | 2.720293000000  | -0.343129000000 | 1.549523000000  |
| S  | -2.160839000000 | -0.760021000000 | 2.191930000000  |
| S  | -0.308315000000 | 3.303862000000  | 0.233634000000  |
| Ag | 1.024778000000  | 3.301442000000  | -1.855572000000 |
| C  | 1.896461000000  | -3.748994000000 | 5.020642000000  |
| C  | -1.956055000000 | 0.384973000000  | 4.775268000000  |
| H  | -2.183242000000 | 1.364937000000  | 4.315503000000  |
| H  | -0.865027000000 | 0.220709000000  | 4.724691000000  |
| C  | -2.681682000000 | -0.717229000000 | 3.995093000000  |
| C  | -2.429805000000 | 0.391293000000  | 6.242087000000  |
| H  | -2.121097000000 | -0.554474000000 | 6.731628000000  |
| H  | -1.920523000000 | 1.209251000000  | 6.783179000000  |
| C  | -4.670776000000 | -0.564916000000 | 5.550103000000  |
| H  | -5.767140000000 | -0.425186000000 | 5.580367000000  |
| H  | -4.467828000000 | -1.548804000000 | 6.018329000000  |
| C  | -3.956680000000 | 0.546408000000  | 6.334990000000  |
| H  | -4.280504000000 | 0.537345000000  | 7.391928000000  |
| H  | -4.249856000000 | 1.528962000000  | 5.915452000000  |
| C  | -4.206800000000 | -0.589683000000 | 4.080836000000  |
| H  | -4.691050000000 | -1.418052000000 | 3.534035000000  |
| H  | -4.518690000000 | 0.347722000000  | 3.586212000000  |
| H  | -2.356589000000 | -1.702932000000 | 4.373797000000  |
| C  | -3.854521000000 | 0.052037000000  | -3.135208000000 |
| H  | -4.425731000000 | -0.843926000000 | -2.831138000000 |
| C  | -3.074782000000 | -0.249320000000 | -4.417376000000 |
| H  | -2.439806000000 | 0.617816000000  | -4.675124000000 |
| H  | -2.418326000000 | -1.121405000000 | -4.256814000000 |
| C  | -4.065748000000 | -0.537678000000 | -5.563412000000 |
| H  | -4.620685000000 | -1.468641000000 | -5.334567000000 |
| H  | -3.499131000000 | -0.725188000000 | -6.493658000000 |
| C  | -5.053919000000 | 0.624210000000  | -5.759999000000 |
| H  | -5.774300000000 | 0.384729000000  | -6.563530000000 |
| H  | -4.494560000000 | 1.522911000000  | -6.083928000000 |
| C  | -5.801388000000 | 0.943316000000  | -4.455020000000 |

|    |                 |                 |                 |
|----|-----------------|-----------------|-----------------|
| H  | -6.473371000000 | 1.811083000000  | -4.588840000000 |
| H  | -6.442986000000 | 0.084062000000  | -4.172807000000 |
| C  | -4.813753000000 | 1.234836000000  | -3.307527000000 |
| H  | -5.357477000000 | 1.432880000000  | -2.367145000000 |
| H  | -4.227402000000 | 2.142425000000  | -3.545655000000 |
| C  | 0.292659000000  | -4.868624000000 | -1.304715000000 |
| H  | 1.220610000000  | -5.375494000000 | -0.987466000000 |
| C  | 0.322207000000  | -4.680496000000 | -2.824962000000 |
| H  | -0.555091000000 | -4.083107000000 | -3.133085000000 |
| H  | 1.234376000000  | -4.133184000000 | -3.116758000000 |
| C  | -0.922264000000 | -5.676306000000 | -0.830420000000 |
| H  | -0.873862000000 | -5.825375000000 | 0.264691000000  |
| H  | -1.839440000000 | -5.093401000000 | -1.032829000000 |
| C  | -3.608761000000 | -3.410184000000 | -2.206794000000 |
| C  | -4.789287000000 | -4.168486000000 | -2.878084000000 |
| C  | -0.782697000000 | 3.269823000000  | -4.398795000000 |
| C  | 4.207906000000  | -2.687804000000 | -2.250740000000 |
| C  | 5.461180000000  | -3.154225000000 | -3.055012000000 |
| C  | -2.250504000000 | 5.752735000000  | -1.725920000000 |
| H  | -1.635847000000 | 5.313825000000  | -2.520328000000 |
| C  | -2.070078000000 | 7.076477000000  | -1.325948000000 |
| H  | -1.314649000000 | 7.707103000000  | -1.800351000000 |
| C  | -2.857129000000 | 7.579847000000  | -0.269001000000 |
| C  | -3.846670000000 | 6.749218000000  | 0.288045000000  |
| H  | -4.488696000000 | 7.123665000000  | 1.089963000000  |
| C  | -3.948337000000 | 5.430166000000  | -0.160507000000 |
| H  | -4.667987000000 | 4.734538000000  | 0.279609000000  |
| C  | -2.936804000000 | -4.356142000000 | 3.848863000000  |
| H  | -1.924158000000 | -4.466926000000 | 4.251287000000  |
| C  | -4.059073000000 | -4.344331000000 | 4.674709000000  |
| H  | -3.969605000000 | -4.443482000000 | 5.758924000000  |
| C  | -5.327574000000 | -4.168381000000 | 4.081304000000  |
| C  | -5.410748000000 | -4.086346000000 | 2.679691000000  |
| H  | -6.385847000000 | -3.974500000000 | 2.196655000000  |
| C  | -4.230281000000 | -4.087872000000 | 1.929469000000  |
| H  | -4.240869000000 | -3.969939000000 | 0.840398000000  |
| C  | -6.525386000000 | -1.676179000000 | -0.798323000000 |
| H  | -5.897266000000 | -2.567783000000 | -0.724995000000 |
| C  | -7.684249000000 | -1.660491000000 | -1.577849000000 |
| H  | -7.996223000000 | -2.549583000000 | -2.131616000000 |
| C  | -7.979445000000 | 0.661202000000  | -0.956514000000 |
| H  | -8.537302000000 | 1.598730000000  | -1.010673000000 |
| C  | -6.808287000000 | 0.564330000000  | -0.209339000000 |
| H  | -6.392824000000 | 1.420988000000  | 0.329957000000  |
| C  | -8.424148000000 | -0.468961000000 | -1.675581000000 |
| C  | 0.276142000000  | -6.058362000000 | -3.516717000000 |
| H  | 1.193197000000  | -6.630446000000 | -3.265429000000 |
| H  | 0.280621000000  | -5.913048000000 | -4.612517000000 |
| C  | -0.960774000000 | -6.861906000000 | -3.083307000000 |
| H  | -0.966783000000 | -7.852478000000 | -3.574783000000 |
| H  | -1.875752000000 | -6.330711000000 | -3.411190000000 |
| C  | -0.993517000000 | -7.034295000000 | -1.556102000000 |
| H  | -1.911132000000 | -7.565401000000 | -1.242034000000 |
| H  | -0.139468000000 | -7.664107000000 | -1.239091000000 |
| Ag | -1.436349000000 | -1.771363000000 | -1.257306000000 |
| Ag | -0.399363000000 | 0.725872000000  | -2.323495000000 |
| Ag | 1.443268000000  | -1.429880000000 | -1.671511000000 |

|    |                  |                 |                 |
|----|------------------|-----------------|-----------------|
| Ag | -2.654171000000  | 2.725965000000  | -0.991547000000 |
| Ag | -3.970283000000  | -0.499846000000 | 0.555564000000  |
| F  | 6.082552000000   | -4.195599000000 | -2.426422000000 |
| F  | 5.178615000000   | -3.543829000000 | -4.316578000000 |
| F  | 6.373648000000   | -2.131521000000 | -3.138257000000 |
| N  | -3.149566000000  | 4.922591000000  | -1.131128000000 |
| N  | -3.006948000000  | -4.196542000000 | 2.501962000000  |
| N  | -6.079663000000  | -0.582874000000 | -0.134102000000 |
| O  | -2.647422000000  | -3.125395000000 | -2.970456000000 |
| O  | -0.575555000000  | 2.029268000000  | -4.438712000000 |
| O  | 3.106115000000   | -2.743298000000 | -2.861354000000 |
| O  | -3.749258000000  | -3.117248000000 | -0.980615000000 |
| O  | -0.239582000000  | 4.162785000000  | -3.675611000000 |
| O  | 4.466782000000   | -2.293474000000 | -1.073867000000 |
| S  | -2.743185000000  | 0.354901000000  | -1.653487000000 |
| S  | 2.095727000000   | 0.884967000000  | -2.364636000000 |
| S  | 0.363034000000   | -3.242474000000 | -0.370116000000 |
| Ag | -1.194830000000  | -3.150818000000 | 1.550460000000  |
| F  | -5.566856000000  | -3.281680000000 | -3.579771000000 |
| F  | -5.605693000000  | -4.769131000000 | -1.965832000000 |
| F  | -4.364735000000  | -5.119635000000 | -3.740874000000 |
| C  | -1.922156000000  | 3.811435000000  | -5.315396000000 |
| F  | -1.589670000000  | 4.978248000000  | -5.916546000000 |
| F  | -3.036405000000  | 4.051949000000  | -4.542652000000 |
| F  | -2.288507000000  | 2.932333000000  | -6.279333000000 |
| C  | 1.854981000000   | -0.276006000000 | -4.947907000000 |
| H  | 1.958406000000   | -1.270883000000 | -4.473823000000 |
| H  | 0.788098000000   | 0.006473000000  | -4.939745000000 |
| C  | 2.673073000000   | 0.742084000000  | -4.144790000000 |
| C  | 2.380252000000   | -0.345002000000 | -6.396255000000 |
| H  | 2.192057000000   | 0.625370000000  | -6.898915000000 |
| H  | 1.804575000000   | -1.105525000000 | -6.954355000000 |
| C  | 4.689258000000   | 0.353549000000  | -5.616623000000 |
| H  | 5.763426000000   | 0.091668000000  | -5.606155000000 |
| H  | 4.611248000000   | 1.357872000000  | -6.080388000000 |
| C  | 3.884060000000   | -0.664601000000 | -6.440149000000 |
| H  | 4.241966000000   | -0.682471000000 | -7.485730000000 |
| H  | 4.055617000000   | -1.675530000000 | -6.021696000000 |
| C  | 4.169470000000   | 0.415513000000  | -4.169519000000 |
| H  | 4.739623000000   | 1.147614000000  | -3.574207000000 |
| H  | 4.320101000000   | -0.567682000000 | -3.694211000000 |
| H  | 2.495019000000   | 1.757297000000  | -4.545672000000 |
| F  | 3.033056000000   | -3.887790000000 | 4.253317000000  |
| F  | 2.210939000000   | -2.925066000000 | 6.048562000000  |
| F  | 1.611208000000   | -4.970887000000 | 5.534035000000  |
| F  | 5.165582000000   | 5.098450000000  | 2.354026000000  |
| F  | 4.085438000000   | 4.991561000000  | 4.257711000000  |
| F  | 5.467588000000   | 3.374138000000  | 3.684227000000  |
| N  | -9.568288000000  | -0.510778000000 | -2.515465000000 |
| N  | -6.546060000000  | -4.052920000000 | 4.797564000000  |
| N  | 9.492220000000   | 0.242414000000  | 2.265666000000  |
| N  | 6.630564000000   | 3.120520000000  | -4.176832000000 |
| N  | -2.724906000000  | 8.875286000000  | 0.288624000000  |
| N  | 2.339324000000   | -8.744594000000 | -0.603292000000 |
| N  | -6.374606000000  | -3.763521000000 | 6.026609000000  |
| N  | -10.145868000000 | 0.618278000000  | -2.639102000000 |
| N  | -1.568240000000  | 9.377527000000  | 0.103815000000  |

|   |                  |                  |                 |
|---|------------------|------------------|-----------------|
| N | 7.254856000000   | 2.303643000000   | -3.424001000000 |
| N | 9.498545000000   | 0.894273000000   | 3.360518000000  |
| N | 2.536569000000   | -8.830771000000  | -1.859843000000 |
| C | -11.286787000000 | 0.591298000000   | -3.481865000000 |
| C | -11.771000000000 | -0.541766000000  | -4.169391000000 |
| C | -11.969663000000 | 1.811987000000   | -3.629971000000 |
| C | -12.910368000000 | -0.386884000000  | -4.962733000000 |
| H | -11.256870000000 | -1.501165000000  | -4.073791000000 |
| C | -13.103980000000 | 1.846290000000   | -4.452948000000 |
| H | -11.606025000000 | 2.700367000000   | -3.105509000000 |
| H | -13.316787000000 | -1.244440000000  | -5.513713000000 |
| H | -13.659370000000 | 2.782760000000   | -4.588747000000 |
| C | 8.379674000000   | 1.686769000000   | -4.028013000000 |
| C | 8.784242000000   | 1.855360000000   | -5.368752000000 |
| C | 9.109700000000   | 0.809014000000   | -3.205998000000 |
| C | 9.899574000000   | 1.137257000000   | -5.808158000000 |
| H | 8.226424000000   | 2.522535000000   | -6.030394000000 |
| C | 10.213644000000  | 0.144864000000   | -3.758352000000 |
| H | 8.802771000000   | 0.658944000000   | -2.166206000000 |
| H | 10.244462000000  | 1.238501000000   | -6.844959000000 |
| H | 10.804555000000  | -0.547117000000  | -3.145015000000 |
| C | 10.676585000000  | 0.721063000000   | 4.131785000000  |
| C | 10.702081000000  | 1.391636000000   | 5.367766000000  |
| C | 11.794967000000  | -0.053651000000  | 3.758375000000  |
| C | 11.841042000000  | 1.258809000000   | 6.174390000000  |
| H | 9.841810000000   | 1.995148000000   | 5.671523000000  |
| C | 12.874004000000  | -0.111129000000  | 4.643849000000  |
| H | 11.799396000000  | -0.585621000000  | 2.803906000000  |
| H | 11.892736000000  | 1.768172000000   | 7.144745000000  |
| H | 13.762800000000  | -0.702310000000  | 4.389456000000  |
| C | 2.130807000000   | -10.066323000000 | -2.427146000000 |
| C | 1.708653000000   | -11.199948000000 | -1.701977000000 |
| C | 2.157691000000   | -10.132720000000 | -3.831666000000 |
| C | 1.337045000000   | -12.335702000000 | -2.426050000000 |
| H | 1.678973000000   | -11.173001000000 | -0.609924000000 |
| C | 1.754811000000   | -11.325362000000 | -4.448760000000 |
| H | 2.481644000000   | -9.260858000000  | -4.407637000000 |
| H | 1.006004000000   | -13.239425000000 | -1.898916000000 |
| H | 1.758561000000   | -11.409316000000 | -5.542678000000 |
| C | -7.578457000000  | -3.643200000000  | 6.767570000000  |
| C | -8.870123000000  | -3.942850000000  | 6.286267000000  |
| C | -7.440111000000  | -3.188274000000  | 8.091088000000  |
| C | -9.948116000000  | -3.768370000000  | 7.157844000000  |
| H | -9.004588000000  | -4.300261000000  | 5.262413000000  |
| C | -8.596074000000  | -3.047015000000  | 8.871438000000  |
| H | -6.444927000000  | -2.951715000000  | 8.478812000000  |
| H | -10.968221000000 | -3.993446000000  | 6.821758000000  |
| H | -8.523192000000  | -2.690773000000  | 9.906622000000  |
| C | -1.408409000000  | 10.681999000000  | 0.638465000000  |
| C | -0.100974000000  | 11.199496000000  | 0.611676000000  |
| C | -2.442046000000  | 11.477679000000  | 1.174806000000  |
| C | 0.116451000000   | 12.484317000000  | 1.128529000000  |
| H | 0.711692000000   | 10.594283000000  | 0.199011000000  |
| C | -2.106257000000  | 12.746214000000  | 1.654870000000  |
| H | -3.466501000000  | 11.098513000000  | 1.205119000000  |
| H | 1.125041000000   | 12.916210000000  | 1.127443000000  |
| H | -2.882383000000  | 13.397255000000  | 2.076697000000  |



|   |                  |                  |                 |
|---|------------------|------------------|-----------------|
| N | -9.836553000000  | -3.328949000000  | 8.431280000000  |
| N | 1.351157000000   | -12.418692000000 | -3.775111000000 |
| N | -13.581390000000 | 0.776690000000   | -5.116154000000 |
| N | -0.856173000000  | 13.260135000000  | 1.642586000000  |
| N | 10.616389000000  | 0.291879000000   | -5.034393000000 |
| N | 12.917726000000  | 0.525440000000   | 5.835641000000  |

### Ag<sub>12</sub>-BPA-Ag<sub>1</sub>

|   |                 |                 |                 |
|---|-----------------|-----------------|-----------------|
| C | 2.576377000000  | 2.393034000000  | 3.345535000000  |
| H | 2.289923000000  | 3.452834000000  | 3.217685000000  |
| C | 1.705271000000  | 1.765977000000  | 4.442080000000  |
| H | 1.930458000000  | 0.683384000000  | 4.500333000000  |
| H | 0.635858000000  | 1.883958000000  | 4.190351000000  |
| C | 2.002917000000  | 2.432420000000  | 5.798679000000  |
| H | 1.690844000000  | 3.494910000000  | 5.754354000000  |
| H | 1.388931000000  | 1.953069000000  | 6.583062000000  |
| C | 3.497078000000  | 2.341467000000  | 6.149121000000  |
| H | 3.699636000000  | 2.851726000000  | 7.108637000000  |
| H | 3.775728000000  | 1.277349000000  | 6.282908000000  |
| C | 4.363641000000  | 2.943115000000  | 5.030739000000  |
| H | 5.438082000000  | 2.831501000000  | 5.266599000000  |
| H | 4.163127000000  | 4.030932000000  | 4.949053000000  |
| C | 4.066149000000  | 2.269636000000  | 3.677261000000  |
| H | 4.684797000000  | 2.715871000000  | 2.878579000000  |
| H | 4.334059000000  | 1.201019000000  | 3.734536000000  |
| C | -3.847501000000 | 1.981719000000  | 2.600778000000  |
| H | -4.446589000000 | 1.070394000000  | 2.775721000000  |
| C | -3.087452000000 | 2.344509000000  | 3.878688000000  |
| H | -2.413946000000 | 3.197724000000  | 3.679935000000  |
| H | -2.466655000000 | 1.488162000000  | 4.192233000000  |
| C | -4.765083000000 | 3.114371000000  | 2.128965000000  |
| H | -5.304708000000 | 2.816024000000  | 1.212089000000  |
| H | -4.145710000000 | 3.994478000000  | 1.875036000000  |
| C | -0.545840000000 | 4.943547000000  | 2.144860000000  |
| C | -1.099385000000 | 6.170900000000  | 2.932583000000  |
| C | 4.165617000000  | -1.534052000000 | 2.915943000000  |
| C | -4.065770000000 | -1.554496000000 | 3.536986000000  |
| C | -5.117619000000 | -2.008753000000 | 4.590909000000  |
| C | 6.770345000000  | -0.677504000000 | -0.125628000000 |
| H | 6.190725000000  | -1.391651000000 | 0.468055000000  |
| C | 7.997564000000  | -1.019091000000 | -0.700919000000 |
| H | 8.377984000000  | -2.041642000000 | -0.574525000000 |
| C | 8.723094000000  | -0.041261000000 | -1.411639000000 |
| C | 8.148768000000  | 1.238370000000  | -1.525455000000 |
| H | 8.666508000000  | 2.046989000000  | -2.051251000000 |
| C | 6.902364000000  | 1.494129000000  | -0.951128000000 |
| H | 6.405703000000  | 2.461365000000  | -1.064278000000 |
| C | -4.912248000000 | 4.668538000000  | -1.248910000000 |
| H | -4.952552000000 | 3.816744000000  | -1.934510000000 |
| C | -6.072200000000 | 5.350219000000  | -0.868207000000 |
| H | -7.026754000000 | 5.034114000000  | -1.294252000000 |
| C | -5.997808000000 | 6.375969000000  | 0.090362000000  |
| C | -4.709744000000 | 6.726214000000  | 0.544038000000  |
| H | -4.573223000000 | 7.532211000000  | 1.273163000000  |
| C | -3.592673000000 | 6.017620000000  | 0.097458000000  |

|    |                 |                 |                 |
|----|-----------------|-----------------|-----------------|
| H  | -2.582661000000 | 6.254720000000  | 0.445514000000  |
| C  | 2.499527000000  | 6.436216000000  | 0.826636000000  |
| H  | 1.456843000000  | 6.692594000000  | 0.608729000000  |
| C  | 3.427203000000  | 7.396173000000  | 1.247964000000  |
| H  | 3.120461000000  | 8.444832000000  | 1.325604000000  |
| C  | 5.047566000000  | 5.638012000000  | 1.461698000000  |
| H  | 6.044174000000  | 5.262920000000  | 1.711760000000  |
| C  | 4.082270000000  | 4.751621000000  | 0.987343000000  |
| H  | 4.315117000000  | 3.697062000000  | 0.822989000000  |
| C  | 4.742268000000  | 7.008077000000  | 1.566606000000  |
| C  | -4.089884000000 | 2.708893000000  | 4.990210000000  |
| H  | -4.685561000000 | 1.810478000000  | 5.249065000000  |
| H  | -3.537343000000 | 2.995491000000  | 5.903571000000  |
| C  | -5.026696000000 | 3.847380000000  | 4.551439000000  |
| H  | -5.758104000000 | 4.074026000000  | 5.349050000000  |
| H  | -4.426246000000 | 4.764254000000  | 4.393184000000  |
| C  | -5.757007000000 | 3.494357000000  | 3.244952000000  |
| H  | -6.377007000000 | 4.346687000000  | 2.904807000000  |
| H  | -6.449234000000 | 2.646478000000  | 3.422942000000  |
| Ag | -0.305037000000 | 1.839989000000  | 1.593276000000  |
| Ag | 1.252023000000  | -0.618741000000 | 2.018225000000  |
| Ag | -1.699579000000 | -0.698902000000 | 1.966644000000  |
| Ag | 4.118591000000  | 0.904940000000  | 0.334263000000  |
| Ag | 1.404485000000  | 3.548017000000  | -0.105531000000 |
| F  | -6.325633000000 | -1.408294000000 | 4.353068000000  |
| F  | -4.765118000000 | -1.715598000000 | 5.864042000000  |
| F  | -5.317111000000 | -3.361398000000 | 4.526665000000  |
| N  | 6.222162000000  | 0.556739000000  | -0.250907000000 |
| N  | -3.689410000000 | 4.969738000000  | -0.756660000000 |
| N  | 2.826428000000  | 5.134273000000  | 0.670697000000  |
| O  | -0.226344000000 | 3.959592000000  | 2.867983000000  |
| O  | 3.128514000000  | -1.327408000000 | 3.585825000000  |
| O  | -3.072196000000 | -0.922105000000 | 3.994362000000  |
| O  | -0.528008000000 | 5.068806000000  | 0.885158000000  |
| O  | 4.298832000000  | -1.877251000000 | 1.692833000000  |
| O  | -4.331079000000 | -1.880988000000 | 2.345485000000  |
| S  | 2.207463000000  | 1.643652000000  | 1.663526000000  |
| S  | -0.177105000000 | -2.615328000000 | 2.066368000000  |
| S  | -2.714576000000 | 1.474011000000  | 1.202831000000  |
| Ag | -2.229419000000 | 3.248670000000  | -0.522033000000 |
| C  | 5.539159000000  | -1.348686000000 | 3.633104000000  |
| C  | -0.149079000000 | -2.321496000000 | 4.866561000000  |
| H  | -0.935990000000 | -1.559701000000 | 4.721813000000  |
| H  | 0.832413000000  | -1.820703000000 | 4.783145000000  |
| C  | -0.276122000000 | -3.382726000000 | 3.765675000000  |
| C  | -0.316675000000 | -2.961626000000 | 6.258576000000  |
| H  | 0.528463000000  | -3.652850000000 | 6.454167000000  |
| H  | -0.265070000000 | -2.171244000000 | 7.029783000000  |
| C  | -1.734728000000 | -4.811355000000 | 5.270623000000  |
| H  | -2.703255000000 | -5.341865000000 | 5.327476000000  |
| H  | -0.943918000000 | -5.570638000000 | 5.438090000000  |
| C  | -1.643309000000 | -3.731898000000 | 6.361735000000  |
| H  | -1.743375000000 | -4.192374000000 | 7.361956000000  |
| H  | -2.486371000000 | -3.023886000000 | 6.246333000000  |
| C  | -1.571990000000 | -4.200911000000 | 3.865353000000  |
| H  | -1.580466000000 | -4.989985000000 | 3.090132000000  |
| H  | -2.428109000000 | -3.537906000000 | 3.651390000000  |

|   |                 |                 |                 |
|---|-----------------|-----------------|-----------------|
| H | 0.599703000000  | -4.058728000000 | 3.807129000000  |
| C | -2.622839000000 | -2.524441000000 | -3.003189000000 |
| H | -2.353354000000 | -3.581557000000 | -2.819045000000 |
| C | -1.922618000000 | -2.036889000000 | -4.275739000000 |
| H | -2.104192000000 | -0.952528000000 | -4.395792000000 |
| H | -0.835584000000 | -2.199673000000 | -4.183576000000 |
| C | -2.473421000000 | -2.784050000000 | -5.505198000000 |
| H | -2.211952000000 | -3.859236000000 | -5.430874000000 |
| H | -1.978283000000 | -2.400193000000 | -6.415883000000 |
| C | -3.998736000000 | -2.629695000000 | -5.613374000000 |
| H | -4.383559000000 | -3.184800000000 | -6.488545000000 |
| H | -4.246848000000 | -1.562185000000 | -5.771778000000 |
| C | -4.692925000000 | -3.114724000000 | -4.330808000000 |
| H | -5.785814000000 | -2.960950000000 | -4.399835000000 |
| H | -4.532348000000 | -4.205904000000 | -4.212069000000 |
| C | -4.148769000000 | -2.382220000000 | -3.088009000000 |
| H | -4.617421000000 | -2.773325000000 | -2.165372000000 |
| H | -4.407319000000 | -1.308213000000 | -3.154607000000 |
| C | 3.865716000000  | -1.097721000000 | -2.980570000000 |
| H | 4.455786000000  | -0.168691000000 | -3.089514000000 |
| C | 2.900117000000  | -1.224220000000 | -4.164048000000 |
| H | 2.226166000000  | -2.085907000000 | -3.997251000000 |
| H | 2.276646000000  | -0.313972000000 | -4.233086000000 |
| C | 4.797904000000  | -2.306996000000 | -2.862826000000 |
| H | 5.486947000000  | -2.163961000000 | -2.012454000000 |
| H | 4.194114000000  | -3.208850000000 | -2.654929000000 |
| C | 0.860707000000  | -4.847795000000 | -2.688548000000 |
| C | 2.030527000000  | -5.661315000000 | -3.331956000000 |
| C | -3.729784000000 | 1.621050000000  | -3.472552000000 |
| C | 3.967409000000  | 2.872745000000  | -2.712311000000 |
| C | 4.850032000000  | 3.832622000000  | -3.569717000000 |
| C | -6.590536000000 | 0.680910000000  | -1.007846000000 |
| H | -5.921131000000 | 1.325826000000  | -1.585571000000 |
| C | -7.971926000000 | 0.688499000000  | -1.198267000000 |
| H | -8.406142000000 | 1.360036000000  | -1.945872000000 |
| C | -8.784041000000 | -0.201492000000 | -0.467485000000 |
| C | -8.155472000000 | -0.984915000000 | 0.515135000000  |
| H | -8.737145000000 | -1.667211000000 | 1.145592000000  |
| C | -6.764126000000 | -0.937509000000 | 0.654818000000  |
| H | -6.233615000000 | -1.548301000000 | 1.394501000000  |
| C | 4.425322000000  | -5.024158000000 | 1.676820000000  |
| H | 4.798323000000  | -4.119401000000 | 2.163498000000  |
| C | 5.139108000000  | -6.221227000000 | 1.738432000000  |
| H | 6.079998000000  | -6.256359000000 | 2.295665000000  |
| C | 4.696967000000  | -7.336854000000 | 1.003984000000  |
| C | 3.473948000000  | -7.210639000000 | 0.322715000000  |
| H | 3.064799000000  | -8.041379000000 | -0.262342000000 |
| C | 2.796898000000  | -5.986844000000 | 0.333526000000  |
| H | 1.861356000000  | -5.855325000000 | -0.220500000000 |
| C | -2.757718000000 | -6.175624000000 | -0.620603000000 |
| H | -1.839667000000 | -6.613206000000 | -1.027690000000 |
| C | -3.981925000000 | -6.847373000000 | -0.668088000000 |
| H | -4.024313000000 | -7.855082000000 | -1.095161000000 |
| C | -5.005089000000 | -4.931079000000 | 0.343950000000  |
| H | -5.861241000000 | -4.371639000000 | 0.726937000000  |
| C | -3.740919000000 | -4.336765000000 | 0.402647000000  |
| H | -3.619524000000 | -3.346312000000 | 0.856079000000  |

|    |                 |                 |                 |
|----|-----------------|-----------------|-----------------|
| C  | -5.150512000000 | -6.234023000000 | -0.174343000000 |
| C  | 3.691840000000  | -1.422800000000 | -5.470874000000 |
| H  | 4.280116000000  | -0.506864000000 | -5.681356000000 |
| H  | 2.984774000000  | -1.548055000000 | -6.311310000000 |
| C  | 4.635201000000  | -2.633567000000 | -5.375866000000 |
| H  | 5.214903000000  | -2.743561000000 | -6.310832000000 |
| H  | 4.031900000000  | -3.554464000000 | -5.258628000000 |
| C  | 5.584455000000  | -2.499804000000 | -4.174015000000 |
| H  | 6.233721000000  | -3.392063000000 | -4.091913000000 |
| H  | 6.257164000000  | -1.630825000000 | -4.324211000000 |
| Ag | 0.557346000000  | -1.590987000000 | -1.483587000000 |
| Ag | -1.269097000000 | 0.601906000000  | -2.135838000000 |
| Ag | 1.598598000000  | 1.116331000000  | -1.874500000000 |
| Ag | -3.752874000000 | -0.400173000000 | -0.221989000000 |
| Ag | -0.637141000000 | -3.893390000000 | -0.154077000000 |
| F  | 6.158170000000  | 3.406049000000  | -3.550240000000 |
| F  | 4.475524000000  | 3.896621000000  | -4.869236000000 |
| F  | 4.834027000000  | 5.106260000000  | -3.079898000000 |
| N  | -5.983083000000 | -0.151077000000 | -0.124994000000 |
| N  | 3.282483000000  | -4.893892000000 | 0.965337000000  |
| N  | -2.628050000000 | -4.944093000000 | -0.075019000000 |
| O  | 0.706880000000  | -3.684692000000 | -3.130864000000 |
| O  | -2.670154000000 | 1.252596000000  | -4.050759000000 |
| O  | 3.250670000000  | 2.069705000000  | -3.377069000000 |
| O  | 0.266331000000  | -5.453039000000 | -1.737330000000 |
| O  | -3.935857000000 | 1.841214000000  | -2.243319000000 |
| O  | 4.089417000000  | 3.010218000000  | -1.464379000000 |
| S  | -1.998241000000 | -1.656791000000 | -1.459926000000 |
| S  | -0.163401000000 | 2.828983000000  | -1.895441000000 |
| S  | 2.981555000000  | -0.835402000000 | -1.351569000000 |
| Ag | 2.550220000000  | -2.768431000000 | 0.428431000000  |
| F  | 2.229373000000  | -5.350918000000 | -4.636021000000 |
| F  | 1.867239000000  | -7.003742000000 | -3.242404000000 |
| F  | 3.202309000000  | -5.360381000000 | -2.663352000000 |
| C  | -4.976551000000 | 1.747201000000  | -4.400739000000 |
| F  | -5.957004000000 | 2.530359000000  | -3.853983000000 |
| F  | -5.531282000000 | 0.507514000000  | -4.595963000000 |
| F  | -4.677931000000 | 2.260040000000  | -5.614652000000 |
| C  | 0.275249000000  | 2.922296000000  | -4.693134000000 |
| H  | 1.296602000000  | 2.538919000000  | -4.510721000000 |
| H  | -0.409198000000 | 2.061832000000  | -4.789073000000 |
| C  | -0.155783000000 | 3.788319000000  | -3.505283000000 |
| C  | 0.267230000000  | 3.764561000000  | -5.984435000000 |
| H  | -0.773561000000 | 4.066563000000  | -6.219830000000 |
| H  | 0.613200000000  | 3.139412000000  | -6.827737000000 |
| C  | 0.710571000000  | 5.868227000000  | -4.641087000000 |
| H  | 1.374011000000  | 6.744490000000  | -4.519403000000 |
| H  | -0.309870000000 | 6.263845000000  | -4.819663000000 |
| C  | 1.148614000000  | 5.016410000000  | -5.843705000000 |
| H  | 1.112849000000  | 5.618415000000  | -6.770305000000 |
| H  | 2.200863000000  | 4.705415000000  | -5.700060000000 |
| C  | 0.712584000000  | 5.041373000000  | -3.340452000000 |
| H  | 0.350406000000  | 5.645116000000  | -2.487820000000 |
| H  | 1.747345000000  | 4.729360000000  | -3.100104000000 |
| H  | -1.217571000000 | 4.075992000000  | -3.622846000000 |
| F  | 6.280749000000  | -0.374305000000 | 3.019520000000  |
| F  | 5.412169000000  | -0.995655000000 | 4.932167000000  |

|   |                  |                 |                 |
|---|------------------|-----------------|-----------------|
| F | 6.268779000000   | -2.501748000000 | 3.581267000000  |
| F | -2.435664000000  | 5.983164000000  | 3.196780000000  |
| F | -0.472137000000  | 6.361973000000  | 4.116145000000  |
| F | -1.000427000000  | 7.331027000000  | 2.221894000000  |
| C | 5.812295000000   | 8.012041000000  | 1.921191000000  |
| H | 5.353035000000   | 8.949845000000  | 2.280257000000  |
| H | 6.439731000000   | 7.618342000000  | 2.741593000000  |
| C | 6.734070000000   | 8.346761000000  | 0.705859000000  |
| H | 7.438742000000   | 9.136249000000  | 1.024993000000  |
| H | 6.114610000000   | 8.768027000000  | -0.105817000000 |
| C | -7.213670000000  | 7.069928000000  | 0.674715000000  |
| H | -7.350031000000  | 6.702592000000  | 1.711681000000  |
| H | -6.983537000000  | 8.145435000000  | 0.786570000000  |
| C | -8.536860000000  | 6.943252000000  | -0.099571000000 |
| H | -9.269723000000  | 7.620448000000  | 0.381382000000  |
| H | -8.398477000000  | 7.336621000000  | -1.123873000000 |
| C | -10.235837000000 | -0.389698000000 | -0.828077000000 |
| H | -10.739321000000 | -1.006983000000 | -0.063306000000 |
| H | -10.736953000000 | 0.595858000000  | -0.864551000000 |
| C | -10.374544000000 | -1.076895000000 | -2.222358000000 |
| H | -11.447448000000 | -1.135965000000 | -2.478003000000 |
| H | -9.896555000000  | -0.429791000000 | -2.980514000000 |
| C | -6.471305000000  | -6.971399000000 | -0.190426000000 |
| H | -6.300363000000  | -7.975511000000 | -0.617581000000 |
| H | -7.189233000000  | -6.464705000000 | -0.866943000000 |
| C | -7.128694000000  | -7.145286000000 | 1.214492000000  |
| H | -7.820634000000  | -8.004798000000 | 1.147881000000  |
| H | -6.354480000000  | -7.414179000000 | 1.954982000000  |
| C | 5.596146000000   | -8.533947000000 | 0.817450000000  |
| H | 6.274100000000   | -8.633614000000 | 1.683537000000  |
| H | 5.010640000000   | -9.467311000000 | 0.743241000000  |
| C | 6.451041000000   | -8.375398000000 | -0.483674000000 |
| H | 7.182869000000   | -9.202731000000 | -0.520226000000 |
| H | 5.787538000000   | -8.482297000000 | -1.359936000000 |
| C | 10.099051000000  | -0.318115000000 | -1.967673000000 |
| C | 7.498322000000   | 7.143619000000  | 0.200288000000  |
| C | 7.082591000000   | 6.423455000000  | -0.932635000000 |
| C | 8.613758000000   | 6.641186000000  | 0.897649000000  |
| C | 7.771794000000   | 5.258506000000  | -1.300479000000 |
| H | 6.215266000000   | 6.744669000000  | -1.517994000000 |
| C | 9.229983000000   | 5.463567000000  | 0.453112000000  |
| H | 8.994174000000   | 7.156298000000  | 1.787547000000  |
| H | 7.444451000000   | 4.688211000000  | -2.175468000000 |
| H | 10.095794000000  | 5.058691000000  | 0.993150000000  |
| C | -9.169054000000  | 5.564506000000  | -0.191765000000 |
| C | -9.992981000000  | 5.246694000000  | -1.288508000000 |
| C | -8.991224000000  | 4.558298000000  | 0.775530000000  |
| C | -10.580901000000 | 3.978912000000  | -1.369194000000 |
| H | -10.166578000000 | 5.982023000000  | -2.082214000000 |
| C | -9.613903000000  | 3.314899000000  | 0.597358000000  |
| H | -8.354154000000  | 4.715583000000  | 1.651416000000  |
| H | -11.222764000000 | 3.722003000000  | -2.221748000000 |
| H | -9.459559000000  | 2.512943000000  | 1.330276000000  |
| C | -9.759689000000  | -2.458943000000 | -2.272839000000 |
| C | -8.369528000000  | -2.655970000000 | -2.401894000000 |
| C | -10.550647000000 | -3.615756000000 | -2.151176000000 |
| C | -7.853005000000  | -3.957368000000 | -2.362807000000 |

|   |                  |                 |                 |
|---|------------------|-----------------|-----------------|
| H | -7.689464000000  | -1.806091000000 | -2.520280000000 |
| C | -9.938489000000  | -4.876058000000 | -2.150752000000 |
| H | -11.639979000000 | -3.535306000000 | -2.060840000000 |
| H | -6.769937000000  | -4.119815000000 | -2.430360000000 |
| H | -10.550329000000 | -5.784535000000 | -2.068987000000 |
| C | -7.909582000000  | -5.935433000000 | 1.681078000000  |
| C | -7.441077000000  | -5.057903000000 | 2.674831000000  |
| C | -9.144081000000  | -5.617460000000 | 1.085207000000  |
| C | -8.185052000000  | -3.909224000000 | 2.984767000000  |
| H | -6.489421000000  | -5.238857000000 | 3.184674000000  |
| C | -9.813298000000  | -4.449945000000 | 1.465837000000  |
| H | -9.565420000000  | -6.263318000000 | 0.308671000000  |
| H | -7.804326000000  | -3.199143000000 | 3.725513000000  |
| H | -10.763459000000 | -4.180233000000 | 0.986994000000  |
| C | 7.151333000000   | -7.035490000000 | -0.538018000000 |
| C | 6.658891000000   | -5.985682000000 | -1.333588000000 |
| C | 8.247139000000   | -6.742711000000 | 0.295157000000  |
| C | 7.258711000000   | -4.722098000000 | -1.245396000000 |
| H | 5.793041000000   | -6.134705000000 | -1.988295000000 |
| C | 8.765601000000   | -5.440686000000 | 0.328474000000  |
| H | 8.679816000000   | -7.516177000000 | 0.940598000000  |
| H | 6.879529000000   | -3.892428000000 | -1.852821000000 |
| H | 9.591304000000   | -5.183378000000 | 1.003633000000  |
| N | 8.828281000000   | 4.760974000000  | -0.626272000000 |
| N | -10.403063000000 | 3.008812000000  | -0.451558000000 |
| N | -8.608049000000  | -5.067652000000 | -2.237953000000 |
| N | -9.352693000000  | -3.584852000000 | 2.392256000000  |
| N | 8.287637000000   | -4.428890000000 | -0.426273000000 |
| H | 10.304146000000  | 0.370762000000  | -2.806044000000 |
| C | 11.217549000000  | -0.130662000000 | -0.894807000000 |
| H | 12.191944000000  | -0.112374000000 | -1.415311000000 |
| H | 11.084991000000  | 0.853600000000  | -0.410861000000 |
| C | 11.213625000000  | -1.236556000000 | 0.133766000000  |
| C | 11.903283000000  | -2.439075000000 | -0.105947000000 |
| C | 10.467834000000  | -1.156850000000 | 1.323483000000  |
| C | 11.807259000000  | -3.482921000000 | 0.820605000000  |
| H | 12.505636000000  | -2.562525000000 | -1.013330000000 |
| C | 10.418639000000  | -2.268224000000 | 2.177335000000  |
| H | 9.908753000000   | -0.248322000000 | 1.571435000000  |
| H | 12.342243000000  | -4.425674000000 | 0.645606000000  |
| H | 9.813637000000   | -2.230334000000 | 3.092472000000  |
| N | 11.070492000000  | -3.425326000000 | 1.948470000000  |
| H | 10.153113000000  | -1.348812000000 | -2.361744000000 |
| H | 1.015791000000   | -3.187365000000 | -0.421157000000 |

### Ag<sub>12</sub>-BPA-SH

|   |                |                |                |
|---|----------------|----------------|----------------|
| C | 2.278595000000 | 2.727590000000 | 3.197867000000 |
| H | 2.006914000000 | 3.782789000000 | 3.008382000000 |
| C | 1.379959000000 | 2.174121000000 | 4.311344000000 |
| H | 1.576063000000 | 1.091295000000 | 4.424683000000 |
| H | 0.317362000000 | 2.306049000000 | 4.038485000000 |
| C | 1.676297000000 | 2.898006000000 | 5.638499000000 |
| H | 1.387974000000 | 3.963787000000 | 5.540664000000 |
| H | 1.042090000000 | 2.469948000000 | 6.436299000000 |
| C | 3.163331000000 | 2.792317000000 | 6.013222000000 |
| H | 3.364059000000 | 3.341472000000 | 6.951403000000 |

|    |                 |                 |                 |
|----|-----------------|-----------------|-----------------|
| H  | 3.418498000000  | 1.730664000000  | 6.196960000000  |
| C  | 4.057517000000  | 3.325784000000  | 4.881947000000  |
| H  | 5.125761000000  | 3.198991000000  | 5.137202000000  |
| H  | 3.883713000000  | 4.413672000000  | 4.752552000000  |
| C  | 3.762510000000  | 2.600170000000  | 3.555401000000  |
| H  | 4.401102000000  | 2.998576000000  | 2.745144000000  |
| H  | 4.007900000000  | 1.530974000000  | 3.660482000000  |
| C  | -4.085058000000 | 1.837659000000  | 2.413353000000  |
| H  | -4.627485000000 | 0.901378000000  | 2.641265000000  |
| C  | -3.380408000000 | 2.336140000000  | 3.678253000000  |
| H  | -2.770356000000 | 3.224943000000  | 3.435303000000  |
| H  | -2.703569000000 | 1.552163000000  | 4.057117000000  |
| C  | -5.065066000000 | 2.874629000000  | 1.852380000000  |
| H  | -5.561584000000 | 2.486520000000  | 0.945318000000  |
| H  | -4.503311000000 | 3.780744000000  | 1.558303000000  |
| C  | -1.033587000000 | 5.094483000000  | 1.742499000000  |
| C  | -1.896490000000 | 6.218506000000  | 2.397706000000  |
| C  | 4.136772000000  | -1.205130000000 | 3.249026000000  |
| C  | -3.888648000000 | -1.727396000000 | 3.778270000000  |
| C  | -4.806825000000 | -2.201281000000 | 4.942204000000  |
| C  | 6.537401000000  | -0.375883000000 | 0.176623000000  |
| H  | 5.766242000000  | -1.147776000000 | 0.103117000000  |
| C  | 7.894534000000  | -0.696869000000 | 0.123482000000  |
| H  | 8.197793000000  | -1.738686000000 | -0.006361000000 |
| C  | 8.860382000000  | 0.321423000000  | 0.246276000000  |
| C  | 8.388013000000  | 1.637112000000  | 0.410543000000  |
| H  | 9.065043000000  | 2.495154000000  | 0.490146000000  |
| C  | 7.011082000000  | 1.874840000000  | 0.445356000000  |
| H  | 6.620247000000  | 2.891177000000  | 0.546864000000  |
| C  | -5.197316000000 | 4.261294000000  | -1.924202000000 |
| H  | -5.259600000000 | 3.315507000000  | -2.472610000000 |
| C  | -6.307318000000 | 5.099361000000  | -1.780606000000 |
| H  | -7.249973000000 | 4.803018000000  | -2.247101000000 |
| C  | -6.210173000000 | 6.262294000000  | -0.996198000000 |
| C  | -4.942392000000 | 6.561200000000  | -0.459267000000 |
| H  | -4.785415000000 | 7.457666000000  | 0.150424000000  |
| C  | -3.870315000000 | 5.692610000000  | -0.671483000000 |
| H  | -2.873751000000 | 5.893240000000  | -0.265788000000 |
| C  | 2.089667000000  | 6.696942000000  | -0.192512000000 |
| H  | 1.133971000000  | 6.830839000000  | -0.708749000000 |
| C  | 2.925765000000  | 7.780661000000  | 0.094739000000  |
| H  | 2.635931000000  | 8.786385000000  | -0.227834000000 |
| C  | 4.421786000000  | 6.249870000000  | 1.180139000000  |
| H  | 5.336702000000  | 6.015741000000  | 1.732368000000  |
| C  | 3.556187000000  | 5.218273000000  | 0.817941000000  |
| H  | 3.790532000000  | 4.176256000000  | 1.047412000000  |
| C  | 4.128391000000  | 7.571314000000  | 0.794766000000  |
| C  | -4.431715000000 | 2.684544000000  | 4.749146000000  |
| H  | -4.958028000000 | 1.756700000000  | 5.050979000000  |
| H  | -3.923305000000 | 3.067659000000  | 5.652725000000  |
| C  | -5.448353000000 | 3.714383000000  | 4.228273000000  |
| H  | -6.218599000000 | 3.916963000000  | 4.995248000000  |
| H  | -4.924392000000 | 4.669922000000  | 4.035647000000  |
| C  | -6.111191000000 | 3.233979000000  | 2.926166000000  |
| H  | -6.792366000000 | 4.010928000000  | 2.529686000000  |
| H  | -6.734658000000 | 2.340578000000  | 3.134768000000  |
| Ag | -0.561921000000 | 1.934345000000  | 1.480494000000  |

|    |                 |                 |                 |
|----|-----------------|-----------------|-----------------|
| Ag | 1.231732000000  | -0.459294000000 | 1.938111000000  |
| Ag | -1.734121000000 | -0.687549000000 | 2.071205000000  |
| Ag | 3.891810000000  | 1.362426000000  | 0.125826000000  |
| Ag | 1.007485000000  | 3.710146000000  | -0.276832000000 |
| F  | -6.063901000000 | -1.680488000000 | 4.786915000000  |
| F  | -4.361404000000 | -1.829626000000 | 6.165786000000  |
| F  | -4.928534000000 | -3.563231000000 | 4.954935000000  |
| N  | 6.091988000000  | 0.890260000000  | 0.334837000000  |
| N  | -3.998707000000 | 4.533792000000  | -1.361802000000 |
| N  | 2.403707000000  | 5.427738000000  | 0.147834000000  |
| O  | -0.646066000000 | 4.198923000000  | 2.542627000000  |
| O  | 3.026195000000  | -0.845892000000 | 3.699738000000  |
| O  | -3.030772000000 | -0.849608000000 | 4.089796000000  |
| O  | -0.871499000000 | 5.193921000000  | 0.490640000000  |
| O  | 4.435219000000  | -1.788473000000 | 2.156079000000  |
| O  | -4.111144000000 | -2.266576000000 | 2.660602000000  |
| S  | 1.927499000000  | 1.896156000000  | 1.550731000000  |
| S  | -0.106363000000 | -2.512654000000 | 2.211594000000  |
| S  | -2.888784000000 | 1.301031000000  | 1.080323000000  |
| Ag | -2.601765000000 | 2.797713000000  | -0.909295000000 |
| C  | 5.393922000000  | -0.905358000000 | 4.122344000000  |
| C  | 0.009590000000  | -2.001550000000 | 4.981044000000  |
| H  | -0.921732000000 | -1.421128000000 | 4.845228000000  |
| H  | 0.865927000000  | -1.328972000000 | 4.800476000000  |
| C  | 0.036065000000  | -3.149127000000 | 3.962010000000  |
| C  | 0.054372000000  | -2.555956000000 | 6.418562000000  |
| H  | 1.030517000000  | -3.052367000000 | 6.594082000000  |
| H  | -0.006043000000 | -1.714111000000 | 7.132497000000  |
| C  | -1.031614000000 | -4.708624000000 | 5.649156000000  |
| H  | -1.870383000000 | -5.411010000000 | 5.808677000000  |
| H  | -0.097832000000 | -5.288306000000 | 5.796539000000  |
| C  | -1.083865000000 | -3.558741000000 | 6.667948000000  |
| H  | -1.025656000000 | -3.958690000000 | 7.696986000000  |
| H  | -2.056288000000 | -3.036530000000 | 6.580623000000  |
| C  | -1.079775000000 | -4.177477000000 | 4.203608000000  |
| H  | -0.993959000000 | -5.008292000000 | 3.478463000000  |
| H  | -2.057646000000 | -3.695772000000 | 4.020547000000  |
| H  | 1.023065000000  | -3.648719000000 | 3.996380000000  |
| C  | -2.173019000000 | -3.065199000000 | -2.726854000000 |
| H  | -1.594452000000 | -3.982584000000 | -2.514019000000 |
| C  | -1.716122000000 | -2.480106000000 | -4.067378000000 |
| H  | -2.227825000000 | -1.516847000000 | -4.244327000000 |
| H  | -0.630418000000 | -2.285371000000 | -4.035394000000 |
| C  | -2.044955000000 | -3.458055000000 | -5.211274000000 |
| H  | -1.441774000000 | -4.380911000000 | -5.092753000000 |
| H  | -1.741320000000 | -3.006430000000 | -6.173497000000 |
| C  | -3.541493000000 | -3.809883000000 | -5.228222000000 |
| H  | -3.760965000000 | -4.530191000000 | -6.037585000000 |
| H  | -4.125179000000 | -2.892934000000 | -5.444599000000 |
| C  | -3.987754000000 | -4.379659000000 | -3.872310000000 |
| H  | -5.070820000000 | -4.604121000000 | -3.880894000000 |
| H  | -3.469340000000 | -5.341725000000 | -3.683689000000 |
| C  | -3.668277000000 | -3.403576000000 | -2.722298000000 |
| H  | -3.961154000000 | -3.839656000000 | -1.750815000000 |
| H  | -4.251410000000 | -2.472629000000 | -2.851694000000 |
| C  | 3.921558000000  | -1.146861000000 | -2.937397000000 |
| H  | 4.788400000000  | -0.460266000000 | -2.995779000000 |



|    |                 |                 |                 |
|----|-----------------|-----------------|-----------------|
| C  | 2.967836000000  | -0.866798000000 | -4.106980000000 |
| H  | 2.046576000000  | -1.463031000000 | -3.964748000000 |
| H  | 2.691380000000  | 0.202316000000  | -4.112222000000 |
| C  | 4.392517000000  | -2.607886000000 | -2.920518000000 |
| H  | 5.106526000000  | -2.767258000000 | -2.091007000000 |
| H  | 3.517279000000  | -3.252020000000 | -2.727603000000 |
| C  | 1.017216000000  | -4.809799000000 | -2.721981000000 |
| C  | 1.592628000000  | -5.729518000000 | -3.844746000000 |
| C  | -3.862372000000 | 0.857606000000  | -3.480699000000 |
| C  | 4.003729000000  | 3.243313000000  | -2.507781000000 |
| C  | 4.443964000000  | 4.481005000000  | -3.351929000000 |
| C  | -6.516260000000 | 0.349779000000  | -0.602654000000 |
| H  | -5.880389000000 | 0.963748000000  | -1.248945000000 |
| C  | -7.905728000000 | 0.468198000000  | -0.606525000000 |
| H  | -8.380047000000 | 1.211780000000  | -1.254963000000 |
| C  | -8.685494000000 | -0.418835000000 | 0.161046000000  |
| C  | -8.000041000000 | -1.301599000000 | 1.012649000000  |
| H  | -8.546869000000 | -1.985379000000 | 1.670902000000  |
| C  | -6.602980000000 | -1.352642000000 | 0.980137000000  |
| H  | -6.034060000000 | -2.032296000000 | 1.622969000000  |
| C  | 5.542972000000  | -4.436396000000 | 0.947271000000  |
| H  | 5.729047000000  | -3.659349000000 | 1.696269000000  |
| C  | 6.534952000000  | -5.348993000000 | 0.572731000000  |
| H  | 7.514905000000  | -5.306758000000 | 1.062987000000  |
| C  | 6.256859000000  | -6.303642000000 | -0.421934000000 |
| C  | 4.960887000000  | -6.305883000000 | -0.973055000000 |
| H  | 4.675435000000  | -7.020724000000 | -1.752340000000 |
| C  | 4.019043000000  | -5.374654000000 | -0.527433000000 |
| H  | 2.999105000000  | -5.366120000000 | -0.923669000000 |
| C  | -2.258419000000 | -6.257727000000 | -0.502213000000 |
| H  | -1.396702000000 | -6.669687000000 | -1.037604000000 |
| C  | -3.532397000000 | -6.822502000000 | -0.606509000000 |
| H  | -3.672132000000 | -7.719882000000 | -1.218565000000 |
| C  | -4.357922000000 | -5.082167000000 | 0.821708000000  |
| H  | -5.144007000000 | -4.547267000000 | 1.359414000000  |
| C  | -3.052609000000 | -4.587678000000 | 0.899168000000  |
| H  | -2.839553000000 | -3.691757000000 | 1.489660000000  |
| C  | -4.625286000000 | -6.244152000000 | 0.069918000000  |
| C  | 3.621539000000  | -1.252476000000 | -5.446736000000 |
| H  | 4.496188000000  | -0.596243000000 | -5.631500000000 |
| H  | 2.905920000000  | -1.064653000000 | -6.268201000000 |
| C  | 4.067126000000  | -2.722455000000 | -5.443668000000 |
| H  | 4.557771000000  | -2.978997000000 | -6.400595000000 |
| H  | 3.178241000000  | -3.373751000000 | -5.350441000000 |
| C  | 5.020025000000  | -3.004646000000 | -4.271321000000 |
| H  | 5.280354000000  | -4.079575000000 | -4.248793000000 |
| H  | 5.967376000000  | -2.447384000000 | -4.422078000000 |
| Ag | 0.803922000000  | -1.695451000000 | -1.281993000000 |
| Ag | -1.188260000000 | 0.275844000000  | -2.078933000000 |
| Ag | 1.606030000000  | 1.111344000000  | -1.805117000000 |
| Ag | -3.688551000000 | -0.897858000000 | -0.201936000000 |
| Ag | -0.006203000000 | -4.114823000000 | 0.166166000000  |
| F  | 5.800496000000  | 4.633572000000  | -3.353874000000 |
| F  | 4.047872000000  | 4.422419000000  | -4.646108000000 |
| F  | 3.910697000000  | 5.629760000000  | -2.819496000000 |
| N  | -5.868995000000 | -0.577965000000 | 0.146198000000  |
| N  | 4.303313000000  | -4.440288000000 | 0.407301000000  |

|    |                  |                 |                 |
|----|------------------|-----------------|-----------------|
| N  | -2.012166000000  | -5.164231000000 | 0.254950000000  |
| O  | 1.098984000000   | -3.579797000000 | -2.956741000000 |
| O  | -2.733235000000  | 0.672190000000  | -4.004741000000 |
| O  | 3.228853000000   | 2.437700000000  | -3.093533000000 |
| O  | 0.591403000000   | -5.435769000000 | -1.698885000000 |
| O  | -4.162448000000  | 1.377979000000  | -2.364423000000 |
| O  | 4.469028000000   | 3.241199000000  | -1.333430000000 |
| S  | -1.752363000000  | -1.968095000000 | -1.261972000000 |
| S  | -0.344159000000  | 2.607137000000  | -2.041165000000 |
| S  | 3.152115000000   | -0.739115000000 | -1.276893000000 |
| Ag | 2.888290000000   | -2.595059000000 | 0.736587000000  |
| F  | 1.363948000000   | -5.217270000000 | -5.081489000000 |
| F  | 1.087702000000   | -6.983384000000 | -3.815828000000 |
| F  | 2.954993000000   | -5.829769000000 | -3.689705000000 |
| C  | -5.105829000000  | 0.338867000000  | -4.269116000000 |
| F  | -6.051814000000  | 1.313970000000  | -4.393954000000 |
| F  | -5.696629000000  | -0.699340000000 | -3.581769000000 |
| F  | -4.814711000000  | -0.121937000000 | -5.505028000000 |
| C  | 0.287597000000   | 2.476803000000  | -4.799554000000 |
| H  | 1.348677000000   | 2.343736000000  | -4.517528000000 |
| H  | -0.197058000000  | 1.484147000000  | -4.819043000000 |
| C  | -0.395116000000  | 3.361260000000  | -3.752552000000 |
| C  | 0.204706000000   | 3.147866000000  | -6.185013000000 |
| H  | -0.855623000000  | 3.196941000000  | -6.505613000000 |
| H  | 0.730813000000   | 2.519548000000  | -6.926987000000 |
| C  | 0.121830000000   | 5.434380000000  | -5.087982000000 |
| H  | 0.588870000000   | 6.435757000000  | -5.045136000000 |
| H  | -0.942497000000  | 5.590150000000  | -5.357591000000 |
| C  | 0.802592000000   | 4.564541000000  | -6.157582000000 |
| H  | 0.710293000000   | 5.039377000000  | -7.151643000000 |
| H  | 1.882714000000   | 4.498449000000  | -5.927894000000 |
| C  | 0.201703000000   | 4.772309000000  | -3.698298000000 |
| H  | -0.328101000000  | 5.379585000000  | -2.940907000000 |
| H  | 1.260028000000   | 4.699791000000  | -3.382686000000 |
| H  | -1.480086000000  | 3.410729000000  | -3.960991000000 |
| F  | 6.288569000000   | -0.125702000000 | 3.441287000000  |
| F  | 5.093403000000   | -0.259951000000 | 5.272546000000  |
| F  | 6.036203000000   | -2.063431000000 | 4.456549000000  |
| F  | -3.190219000000  | 5.774704000000  | 2.551167000000  |
| F  | -1.442831000000  | 6.576476000000  | 3.620478000000  |
| F  | -1.963110000000  | 7.345463000000  | 1.634238000000  |
| C  | 5.105121000000   | 8.693552000000  | 1.051265000000  |
| H  | 4.580342000000   | 9.665070000000  | 1.035707000000  |
| H  | 5.554690000000   | 8.578648000000  | 2.054356000000  |
| C  | 6.252803000000   | 8.734459000000  | -0.006217000000 |
| H  | 6.878303000000   | 9.620249000000  | 0.207143000000  |
| H  | 5.810348000000   | 8.875957000000  | -1.008219000000 |
| C  | -7.388072000000  | 7.171675000000  | -0.697913000000 |
| H  | -7.470021000000  | 7.280298000000  | 0.401109000000  |
| H  | -7.149063000000  | 8.188312000000  | -1.063731000000 |
| C  | -8.748310000000  | 6.764065000000  | -1.285175000000 |
| H  | -9.479122000000  | 7.552933000000  | -1.020792000000 |
| H  | -8.692850000000  | 6.777495000000  | -2.390073000000 |
| C  | -10.174451000000 | -0.518300000000 | -0.054341000000 |
| H  | -10.622692000000 | -1.180010000000 | 0.707426000000  |
| H  | -10.638233000000 | 0.482786000000  | 0.028182000000  |
| C  | -10.478376000000 | -1.085049000000 | -1.479169000000 |

|   |                  |                 |                 |
|---|------------------|-----------------|-----------------|
| H | -11.573584000000 | -1.177522000000 | -1.590081000000 |
| H | -10.136815000000 | -0.347838000000 | -2.228318000000 |
| C | -5.994950000000  | -6.882060000000 | -0.004370000000 |
| H | -5.905578000000  | -7.821281000000 | -0.577895000000 |
| H | -6.692449000000  | -6.240587000000 | -0.579520000000 |
| C | -6.622592000000  | -7.207829000000 | 1.388253000000  |
| H | -7.276333000000  | -8.089479000000 | 1.259250000000  |
| H | -5.825079000000  | -7.503649000000 | 2.092612000000  |
| C | 7.324257000000   | -7.249613000000 | -0.920070000000 |
| H | 8.132691000000   | -7.327440000000 | -0.171809000000 |
| H | 6.898314000000   | -8.260753000000 | -1.053064000000 |
| C | 7.932747000000   | -6.803238000000 | -2.282625000000 |
| H | 8.633011000000   | -7.588610000000 | -2.619409000000 |
| H | 7.122112000000   | -6.746643000000 | -3.031783000000 |
| C | 10.335869000000  | 0.004731000000  | 0.254382000000  |
| C | 7.098020000000   | 7.481809000000  | 0.014582000000  |
| C | 6.874563000000   | 6.427844000000  | -0.887155000000 |
| C | 8.079218000000   | 7.280015000000  | 1.004154000000  |
| C | 7.605937000000   | 5.239054000000  | -0.749928000000 |
| H | 6.116794000000   | 6.508293000000  | -1.671132000000 |
| C | 8.757209000000   | 6.055659000000  | 1.058094000000  |
| H | 8.305208000000   | 8.065017000000  | 1.735264000000  |
| H | 7.413174000000   | 4.403520000000  | -1.431431000000 |
| H | 9.520660000000   | 5.881271000000  | 1.827344000000  |
| C | -9.315783000000  | 5.424131000000  | -0.847958000000 |
| C | -10.277246000000 | 4.776885000000  | -1.647645000000 |
| C | -8.931868000000  | 4.765700000000  | 0.333899000000  |
| C | -10.791316000000 | 3.538679000000  | -1.245720000000 |
| H | -10.615353000000 | 5.231448000000  | -2.585801000000 |
| C | -9.497691000000  | 3.521038000000  | 0.644439000000  |
| H | -8.177880000000  | 5.192654000000  | 1.002100000000  |
| H | -11.538165000000 | 3.023888000000  | -1.863891000000 |
| H | -9.183635000000  | 2.985943000000  | 1.549399000000  |
| C | -9.812936000000  | -2.419424000000 | -1.738982000000 |
| C | -8.479768000000  | -2.509068000000 | -2.187015000000 |
| C | -10.474259000000 | -3.634361000000 | -1.485728000000 |
| C | -7.873308000000  | -3.766764000000 | -2.297826000000 |
| H | -7.905201000000  | -1.610532000000 | -2.430871000000 |
| C | -9.786462000000  | -4.843392000000 | -1.657218000000 |
| H | -11.519066000000 | -3.639868000000 | -1.154057000000 |
| H | -6.823848000000  | -3.839666000000 | -2.610768000000 |
| H | -10.301002000000 | -5.796462000000 | -1.474286000000 |
| C | -7.453327000000  | -6.084979000000 | 1.971588000000  |
| C | -7.016648000000  | -5.270348000000 | 3.030744000000  |
| C | -8.722772000000  | -5.801770000000 | 1.435002000000  |
| C | -7.833319000000  | -4.216710000000 | 3.469325000000  |
| H | -6.043003000000  | -5.431274000000 | 3.504303000000  |
| C | -9.463577000000  | -4.730698000000 | 1.943532000000  |
| H | -9.120844000000  | -6.404785000000 | 0.612967000000  |
| H | -7.489147000000  | -3.556838000000 | 4.271762000000  |
| H | -10.446168000000 | -4.490168000000 | 1.517592000000  |
| C | 8.650412000000   | -5.475325000000 | -2.206929000000 |
| C | 7.978404000000   | -4.263509000000 | -2.447126000000 |
| C | 10.011328000000  | -5.387997000000 | -1.863553000000 |
| C | 8.676114000000   | -3.053908000000 | -2.336121000000 |
| H | 6.920123000000   | -4.262367000000 | -2.722420000000 |
| C | 10.617079000000  | -4.127630000000 | -1.772141000000 |

|   |                  |                 |                 |
|---|------------------|-----------------|-----------------|
| H | 10.597443000000  | -6.294212000000 | -1.672038000000 |
| H | 8.161068000000   | -2.103189000000 | -2.525323000000 |
| H | 11.679264000000  | -4.047297000000 | -1.506420000000 |
| N | 8.533357000000   | 5.032559000000  | 0.207791000000  |
| N | -10.416251000000 | 2.898667000000  | -0.120381000000 |
| N | -8.495838000000  | -4.934041000000 | -2.033564000000 |
| N | -9.040619000000  | -3.928221000000 | 2.941352000000  |
| N | 9.978045000000   | -2.962810000000 | -1.995634000000 |
| H | 10.908235000000  | 0.907323000000  | -0.023236000000 |
| C | 10.830861000000  | -0.474316000000 | 1.656048000000  |
| H | 11.935602000000  | -0.491680000000 | 1.637333000000  |
| H | 10.525478000000  | 0.264031000000  | 2.418876000000  |
| C | 10.309441000000  | -1.846950000000 | 2.010127000000  |
| C | 10.935633000000  | -3.000953000000 | 1.504476000000  |
| C | 9.143856000000   | -2.038744000000 | 2.774128000000  |
| C | 10.367080000000  | -4.256350000000 | 1.745503000000  |
| H | 11.848358000000  | -2.916588000000 | 0.904301000000  |
| C | 8.655251000000   | -3.339552000000 | 2.961564000000  |
| H | 8.595685000000   | -1.189479000000 | 3.192956000000  |
| H | 10.835356000000  | -5.161640000000 | 1.338054000000  |
| H | 7.737613000000   | -3.497453000000 | 3.538880000000  |
| N | 9.235394000000   | -4.446461000000 | 2.452852000000  |
| H | 10.554072000000  | -0.780505000000 | -0.493715000000 |
| H | 1.533668000000   | -3.275918000000 | -0.161399000000 |

### Ag<sub>12</sub>-Bpv-AgH

|   |                 |                 |                |
|---|-----------------|-----------------|----------------|
| C | 2.854593000000  | -3.171631000000 | 2.949415000000 |
| H | 3.948300000000  | -3.123960000000 | 2.797042000000 |
| C | 2.484326000000  | -2.410625000000 | 4.228220000000 |
| H | 1.381695000000  | -2.393985000000 | 4.327317000000 |
| H | 2.843630000000  | -1.369543000000 | 4.167957000000 |
| C | 3.095778000000  | -3.122197000000 | 5.451785000000 |
| H | 4.202765000000  | -3.072780000000 | 5.385638000000 |
| H | 2.811060000000  | -2.578187000000 | 6.370713000000 |
| C | 2.649655000000  | -4.591053000000 | 5.528948000000 |
| H | 3.117601000000  | -5.091787000000 | 6.396327000000 |
| H | 1.553582000000  | -4.625841000000 | 5.686817000000 |
| C | 2.995377000000  | -5.340905000000 | 4.232309000000 |
| H | 2.624173000000  | -6.381444000000 | 4.273226000000 |
| H | 4.096408000000  | -5.402812000000 | 4.122414000000 |
| C | 2.395343000000  | -4.633275000000 | 3.002269000000 |
| H | 2.676554000000  | -5.160262000000 | 2.071721000000 |
| H | 1.292238000000  | -4.642548000000 | 3.076932000000 |
| C | 1.396402000000  | 3.408173000000  | 3.109216000000 |
| H | 0.495108000000  | 4.047926000000  | 3.143072000000 |
| C | 1.393473000000  | 2.470877000000  | 4.321944000000 |
| H | 2.232429000000  | 1.756629000000  | 4.228703000000 |
| H | 0.449749000000  | 1.898411000000  | 4.345824000000 |
| C | 2.658178000000  | 4.277308000000  | 3.051849000000 |
| H | 2.618192000000  | 4.951290000000  | 2.177470000000 |
| H | 3.542703000000  | 3.626930000000  | 2.918151000000 |
| C | 4.896431000000  | 0.882734000000  | 2.550419000000 |
| C | 5.952615000000  | 1.734530000000  | 3.315603000000 |
| C | -1.882070000000 | -4.163429000000 | 3.363502000000 |
| C | -2.840598000000 | 3.084644000000  | 2.935099000000 |
| C | -3.805116000000 | 3.770786000000  | 3.952497000000 |

|    |                 |                 |                 |
|----|-----------------|-----------------|-----------------|
| C  | -0.265830000000 | -6.130757000000 | 0.662383000000  |
| H  | -0.111215000000 | -5.658017000000 | 1.636421000000  |
| C  | -1.517328000000 | -6.647074000000 | 0.320377000000  |
| H  | -2.331008000000 | -6.580722000000 | 1.047216000000  |
| C  | -1.717232000000 | -7.185964000000 | -0.967380000000 |
| C  | -0.587038000000 | -7.261631000000 | -1.811812000000 |
| H  | -0.671296000000 | -7.667804000000 | -2.824514000000 |
| C  | 0.627156000000  | -6.713398000000 | -1.388484000000 |
| H  | 1.499942000000  | -6.687559000000 | -2.050941000000 |
| C  | 4.887252000000  | 4.496280000000  | -1.797062000000 |
| H  | 3.954751000000  | 5.067339000000  | -1.804733000000 |
| C  | 5.853714000000  | 4.676054000000  | -2.788807000000 |
| H  | 5.684566000000  | 5.414336000000  | -3.578295000000 |
| C  | 7.032743000000  | 3.902769000000  | -2.761602000000 |
| C  | 7.190856000000  | 3.013424000000  | -1.679106000000 |
| H  | 8.077411000000  | 2.376510000000  | -1.605071000000 |
| C  | 6.170642000000  | 2.878059000000  | -0.734183000000 |
| H  | 6.230069000000  | 2.148355000000  | 0.081011000000  |
| C  | 6.309401000000  | -2.295841000000 | 1.625257000000  |
| H  | 6.480906000000  | -1.225533000000 | 1.775682000000  |
| C  | 6.821694000000  | -3.247245000000 | 2.510168000000  |
| H  | 7.428295000000  | -2.920231000000 | 3.359791000000  |
| C  | 5.804074000000  | -4.950650000000 | 1.151769000000  |
| H  | 5.547751000000  | -5.991237000000 | 0.931681000000  |
| C  | 5.324528000000  | -3.939837000000 | 0.314492000000  |
| H  | 4.717244000000  | -4.180038000000 | -0.564856000000 |
| C  | 6.550508000000  | -4.615482000000 | 2.299807000000  |
| C  | 1.551518000000  | 3.288347000000  | 5.618943000000  |
| H  | 0.659328000000  | 3.932290000000  | 5.755869000000  |
| H  | 1.579832000000  | 2.599065000000  | 6.482473000000  |
| C  | 2.817508000000  | 4.160209000000  | 5.582315000000  |
| H  | 2.901968000000  | 4.755809000000  | 6.509597000000  |
| H  | 3.710123000000  | 3.506513000000  | 5.533746000000  |
| C  | 2.809872000000  | 5.085183000000  | 4.354901000000  |
| H  | 3.739814000000  | 5.682669000000  | 4.309695000000  |
| H  | 1.970277000000  | 5.804614000000  | 4.439490000000  |
| Ag | 1.971782000000  | 0.127818000000  | 1.727325000000  |
| Ag | -0.225508000000 | -1.858695000000 | 1.839434000000  |
| Ag | -0.790133000000 | 1.008219000000  | 1.804964000000  |
| Ag | 1.572440000000  | -3.889606000000 | -0.443456000000 |
| Ag | 4.010985000000  | -1.073739000000 | -0.113982000000 |
| F  | -3.794231000000 | 5.130850000000  | 3.789442000000  |
| F  | -3.501224000000 | 3.513125000000  | 5.244635000000  |
| F  | -5.092615000000 | 3.351758000000  | 3.746898000000  |
| N  | 0.792147000000  | -6.113771000000 | -0.183420000000 |
| N  | 5.017588000000  | 3.588401000000  | -0.799589000000 |
| N  | 5.545908000000  | -2.624181000000 | 0.554890000000  |
| O  | 3.891458000000  | 0.503263000000  | 3.209344000000  |
| O  | -0.815382000000 | -3.511955000000 | 3.521615000000  |
| O  | -1.831903000000 | 2.512304000000  | 3.431708000000  |
| O  | 5.188186000000  | 0.690817000000  | 1.331399000000  |
| O  | -2.518590000000 | -4.450156000000 | 2.304879000000  |
| O  | -3.202631000000 | 3.199446000000  | 1.727743000000  |
| S  | 2.154315000000  | -2.341922000000 | 1.422506000000  |
| S  | -2.472225000000 | -0.838073000000 | 1.550790000000  |
| S  | 1.193302000000  | 2.486544000000  | 1.489209000000  |
| Ag | 3.133699000000  | 2.596486000000  | -0.021669000000 |

|   |                 |                 |                 |
|---|-----------------|-----------------|-----------------|
| C | -2.549574000000 | -4.723708000000 | 4.654311000000  |
| C | -2.666166000000 | -0.654125000000 | 4.386020000000  |
| H | -2.330203000000 | 0.397268000000  | 4.315558000000  |
| H | -1.766792000000 | -1.292374000000 | 4.449691000000  |
| C | -3.467366000000 | -1.009637000000 | 3.127807000000  |
| C | -3.545983000000 | -0.836734000000 | 5.639284000000  |
| H | -3.796096000000 | -1.908952000000 | 5.757825000000  |
| H | -2.967196000000 | -0.544977000000 | 6.534456000000  |
| C | -5.626313000000 | -0.367216000000 | 4.268612000000  |
| H | -6.533237000000 | 0.258889000000  | 4.178667000000  |
| H | -5.970316000000 | -1.419835000000 | 4.328036000000  |
| C | -4.840508000000 | -0.012724000000 | 5.541560000000  |
| H | -5.469005000000 | -0.179347000000 | 6.435422000000  |
| H | -4.588863000000 | 1.065285000000  | 5.523798000000  |
| C | -4.758191000000 | -0.190270000000 | 3.008492000000  |
| H | -5.317918000000 | -0.488611000000 | 2.104014000000  |
| H | -4.501238000000 | 0.878780000000  | 2.889196000000  |
| H | -3.720480000000 | -2.085820000000 | 3.146834000000  |
| C | -2.757774000000 | 2.887366000000  | -2.932492000000 |
| H | -3.553453000000 | 2.139404000000  | -3.099304000000 |
| C | -1.987501000000 | 3.108472000000  | -4.236727000000 |
| H | -1.137737000000 | 3.788799000000  | -4.049695000000 |
| H | -1.575446000000 | 2.149359000000  | -4.593272000000 |
| C | -2.928214000000 | 3.718786000000  | -5.293651000000 |
| H | -3.717088000000 | 2.982147000000  | -5.542936000000 |
| H | -2.361294000000 | 3.904042000000  | -6.223969000000 |
| C | -3.574600000000 | 5.019013000000  | -4.787182000000 |
| H | -4.266997000000 | 5.427156000000  | -5.546083000000 |
| H | -2.783276000000 | 5.779963000000  | -4.633084000000 |
| C | -4.315799000000 | 4.792237000000  | -3.458988000000 |
| H | -4.737190000000 | 5.740996000000  | -3.077992000000 |
| H | -5.172068000000 | 4.106927000000  | -3.623928000000 |
| C | -3.382416000000 | 4.180952000000  | -2.394926000000 |
| H | -3.929879000000 | 3.982601000000  | -1.456167000000 |
| H | -2.570361000000 | 4.895261000000  | -2.150780000000 |
| C | -1.133518000000 | -3.933084000000 | -3.129912000000 |
| H | -0.631208000000 | -4.913340000000 | -3.039622000000 |
| C | -0.601677000000 | -3.199096000000 | -4.367640000000 |
| H | -1.021383000000 | -2.175753000000 | -4.395450000000 |
| H | 0.497083000000  | -3.104919000000 | -4.310395000000 |
| C | -2.650810000000 | -4.142185000000 | -3.185975000000 |
| H | -2.989663000000 | -4.696112000000 | -2.292221000000 |
| H | -3.145035000000 | -3.154042000000 | -3.161373000000 |
| C | -3.373277000000 | -0.495258000000 | -3.930693000000 |
| C | -4.726559000000 | -0.467958000000 | -4.701454000000 |
| C | 1.506495000000  | 4.260388000000  | -2.758356000000 |
| C | 3.353232000000  | -3.651247000000 | -3.080692000000 |
| C | 4.583343000000  | -4.021744000000 | -3.959727000000 |
| C | 0.660778000000  | 6.427218000000  | 0.695262000000  |
| H | 1.305831000000  | 6.160181000000  | -0.149233000000 |
| C | 1.001353000000  | 7.431536000000  | 1.603603000000  |
| H | 1.927399000000  | 7.995459000000  | 1.457968000000  |
| C | 0.152452000000  | 7.711398000000  | 2.695712000000  |
| C | -1.046532000000 | 6.973981000000  | 2.781029000000  |
| H | -1.746508000000 | 7.119908000000  | 3.608657000000  |
| C | -1.324400000000 | 5.995306000000  | 1.825109000000  |
| H | -2.239329000000 | 5.399394000000  | 1.870611000000  |

|    |                 |                 |                 |
|----|-----------------|-----------------|-----------------|
| C  | -5.327167000000 | -3.617248000000 | 1.361489000000  |
| H  | -4.777296000000 | -4.225206000000 | 2.087597000000  |
| C  | -6.603226000000 | -3.119828000000 | 1.639845000000  |
| H  | -7.068650000000 | -3.343246000000 | 2.604574000000  |
| C  | -7.242580000000 | -2.274741000000 | 0.708654000000  |
| C  | -6.556856000000 | -2.016691000000 | -0.495569000000 |
| H  | -7.001316000000 | -1.392571000000 | -1.275588000000 |
| C  | -5.283193000000 | -2.552581000000 | -0.698820000000 |
| H  | -4.721417000000 | -2.313716000000 | -1.606595000000 |
| C  | -5.831254000000 | 1.268782000000  | -1.552957000000 |
| H  | -5.233313000000 | 0.518656000000  | -2.079497000000 |
| C  | -7.039189000000 | 1.739675000000  | -2.072380000000 |
| H  | -7.379851000000 | 1.374083000000  | -3.045435000000 |
| C  | -7.234506000000 | 3.142225000000  | -0.124798000000 |
| H  | -7.773202000000 | 3.865118000000  | 0.495155000000  |
| C  | -6.012112000000 | 2.630552000000  | 0.319809000000  |
| H  | -5.550801000000 | 2.964987000000  | 1.254339000000  |
| C  | -7.780329000000 | 2.695994000000  | -1.347083000000 |
| C  | -1.012538000000 | -3.952335000000 | -5.648851000000 |
| H  | -0.504042000000 | -4.938074000000 | -5.677121000000 |
| H  | -0.657792000000 | -3.387462000000 | -6.529669000000 |
| C  | -2.534083000000 | -4.163232000000 | -5.720518000000 |
| H  | -2.799649000000 | -4.731403000000 | -6.630714000000 |
| H  | -3.034594000000 | -3.178507000000 | -5.801888000000 |
| C  | -3.048715000000 | -4.893717000000 | -4.469227000000 |
| H  | -4.148056000000 | -5.007439000000 | -4.502062000000 |
| H  | -2.628758000000 | -5.919851000000 | -4.436651000000 |
| Ag | -1.353826000000 | -0.544747000000 | -1.820610000000 |
| Ag | 0.801367000000  | 1.449768000000  | -2.118208000000 |
| Ag | 1.475262000000  | -1.376986000000 | -1.946171000000 |
| Ag | -0.594735000000 | 3.674527000000  | -0.123875000000 |
| Ag | -3.176878000000 | 1.120977000000  | 0.161732000000  |
| F  | 4.713496000000  | -5.358689000000 | -4.120064000000 |
| F  | 4.543107000000  | -3.454071000000 | -5.189085000000 |
| F  | 5.715468000000  | -3.565797000000 | -3.331518000000 |
| N  | -0.477765000000 | 5.701382000000  | 0.809913000000  |
| N  | -4.660132000000 | -3.331867000000 | 0.216720000000  |
| N  | -5.319842000000 | 1.699949000000  | -0.376933000000 |
| O  | -2.339666000000 | -0.243959000000 | -4.577739000000 |
| O  | 1.333316000000  | 3.232955000000  | -3.477841000000 |
| O  | 2.745429000000  | -2.596815000000 | -3.423175000000 |
| O  | -3.497307000000 | -0.747128000000 | -2.676761000000 |
| O  | 1.651510000000  | 4.347419000000  | -1.505171000000 |
| O  | 3.165807000000  | -4.425011000000 | -2.097010000000 |
| S  | -1.690300000000 | 2.105096000000  | -1.615432000000 |
| S  | 3.238603000000  | 0.605630000000  | -1.718632000000 |
| S  | -0.658139000000 | -3.044815000000 | -1.554615000000 |
| Ag | -2.314313000000 | -3.260710000000 | 0.240731000000  |
| F  | -5.181767000000 | 0.825779000000  | -4.793070000000 |
| F  | -5.709301000000 | -1.175979000000 | -4.066270000000 |
| F  | -4.612700000000 | -0.957785000000 | -5.953307000000 |
| C  | 1.453658000000  | 5.618650000000  | -3.512955000000 |
| F  | 2.244557000000  | 6.556606000000  | -2.913165000000 |
| F  | 0.169173000000  | 6.092454000000  | -3.483126000000 |
| F  | 1.834066000000  | 5.527571000000  | -4.805861000000 |
| C  | 3.607188000000  | 0.633384000000  | -4.511720000000 |
| H  | 3.226720000000  | -0.405103000000 | -4.536741000000 |

|   |                  |                 |                 |
|---|------------------|-----------------|-----------------|
| H | 2.741746000000   | 1.317224000000  | -4.568293000000 |
| C | 4.359981000000   | 0.852271000000  | -3.192424000000 |
| C | 4.559194000000   | 0.868391000000  | -5.701232000000 |
| H | 4.871089000000   | 1.933603000000  | -5.713968000000 |
| H | 4.016232000000   | 0.687684000000  | -6.646690000000 |
| C | 6.540214000000   | 0.179869000000  | -4.277389000000 |
| H | 7.403525000000   | -0.506195000000 | -4.197375000000 |
| H | 6.947808000000   | 1.209901000000  | -4.237730000000 |
| C | 5.805125000000   | -0.028007000000 | -5.611192000000 |
| H | 6.486909000000   | 0.175175000000  | -6.457238000000 |
| H | 5.496380000000   | -1.087852000000 | -5.691265000000 |
| C | 5.598295000000   | -0.045059000000 | -3.078762000000 |
| H | 6.124034000000   | 0.150588000000  | -2.126395000000 |
| H | 5.273315000000   | -1.101193000000 | -3.059149000000 |
| H | 4.659319000000   | 1.915055000000  | -3.115499000000 |
| F | -2.490183000000  | -6.082536000000 | 4.672456000000  |
| F | -1.976771000000  | -4.263932000000 | 5.789114000000  |
| F | -3.873948000000  | -4.367959000000 | 4.693047000000  |
| F | 6.027026000000   | 2.988872000000  | 2.767079000000  |
| F | 5.675486000000   | 1.885926000000  | 4.631589000000  |
| F | 7.189827000000   | 1.171179000000  | 3.212666000000  |
| C | 0.512488000000   | 8.722957000000  | 3.715788000000  |
| C | -0.465109000000  | 9.527197000000  | 4.334989000000  |
| C | 1.850292000000   | 8.912535000000  | 4.118196000000  |
| C | -0.066549000000  | 10.461056000000 | 5.299814000000  |
| H | -1.518996000000  | 9.445662000000  | 4.050546000000  |
| C | 2.136631000000   | 9.872269000000  | 5.097360000000  |
| H | 2.653135000000   | 8.297191000000  | 3.699889000000  |
| H | -0.814850000000  | 11.100348000000 | 5.785517000000  |
| H | 3.171834000000   | 10.024758000000 | 5.428566000000  |
| C | -9.091134000000  | 3.187114000000  | -1.830121000000 |
| C | -10.002844000000 | 2.321225000000  | -2.467533000000 |
| C | -9.487597000000  | 4.528023000000  | -1.656836000000 |
| C | -11.239370000000 | 2.827448000000  | -2.888846000000 |
| H | -9.764492000000  | 1.261321000000  | -2.603771000000 |
| C | -10.745758000000 | 4.929309000000  | -2.123989000000 |
| H | -8.814196000000  | 5.254039000000  | -1.190017000000 |
| H | -11.965470000000 | 2.164975000000  | -3.376883000000 |
| H | -11.067217000000 | 5.972049000000  | -2.006392000000 |
| C | 6.998630000000   | -5.649232000000 | 3.260470000000  |
| C | 6.995543000000   | -5.401375000000 | 4.648576000000  |
| C | 7.419890000000   | -6.924455000000 | 2.834607000000  |
| C | 7.401074000000   | -6.418830000000 | 5.521684000000  |
| H | 6.648662000000   | -4.441069000000 | 5.044351000000  |
| C | 7.811248000000   | -7.866203000000 | 3.795033000000  |
| H | 7.466836000000   | -7.171274000000 | 1.769132000000  |
| H | 7.393750000000   | -6.246077000000 | 6.605478000000  |
| H | 8.149933000000   | -8.861522000000 | 3.480157000000  |
| C | -3.065148000000  | -7.570649000000 | -1.434963000000 |
| C | -4.204764000000  | -6.843035000000 | -1.028996000000 |
| C | -3.269543000000  | -8.636078000000 | -2.339463000000 |
| C | -5.454605000000  | -7.195381000000 | -1.545309000000 |
| H | -4.102468000000  | -5.985468000000 | -0.354551000000 |
| H | -2.418070000000  | -9.254143000000 | -2.654972000000 |
| C | -5.530092000000  | -8.263527000000 | -2.452952000000 |
| H | -6.353983000000  | -6.639215000000 | -1.262298000000 |
| H | -6.493121000000  | -8.555581000000 | -2.890651000000 |



|   |                  |                 |                 |
|---|------------------|-----------------|-----------------|
| C | -8.553527000000  | -1.648412000000 | 0.996206000000  |
| C | -8.843485000000  | -0.344515000000 | 0.545279000000  |
| C | -9.553178000000  | -2.308790000000 | 1.736966000000  |
| C | -10.089110000000 | 0.220430000000  | 0.845718000000  |
| H | -8.098521000000  | 0.232081000000  | -0.009808000000 |
| C | -10.766224000000 | -1.650306000000 | 1.979094000000  |
| H | -9.400499000000  | -3.330764000000 | 2.098600000000  |
| H | -10.326488000000 | 1.235522000000  | 0.500975000000  |
| H | -11.558103000000 | -2.153663000000 | 2.548508000000  |
| C | 8.036756000000   | 3.983490000000  | -3.846591000000 |
| C | 7.639306000000   | 4.130830000000  | -5.191288000000 |
| C | 9.418381000000   | 3.884325000000  | -3.589348000000 |
| C | 8.621251000000   | 4.168547000000  | -6.189526000000 |
| H | 6.578388000000   | 4.179959000000  | -5.457985000000 |
| C | 10.314643000000  | 3.941157000000  | -4.664368000000 |
| H | 9.790880000000   | 3.789101000000  | -2.564340000000 |
| H | 8.328704000000   | 4.271193000000  | -7.242308000000 |
| H | 11.394783000000  | 3.874235000000  | -4.481532000000 |
| N | 1.208768000000   | 10.647049000000 | 5.691262000000  |
| N | -11.624042000000 | 4.108393000000  | -2.731350000000 |
| N | -11.052134000000 | -0.405888000000 | 1.549686000000  |
| N | 7.807997000000   | -7.639145000000 | 5.122710000000  |
| N | -4.462888000000  | -8.985808000000 | -2.845786000000 |
| N | 9.943988000000   | 4.078850000000  | -5.952000000000 |
| H | 0.336180000000   | -0.115653000000 | -1.144261000000 |

### Ag<sub>12</sub>-BPvSH

|   |                 |                 |                |
|---|-----------------|-----------------|----------------|
| C | 3.153163000000  | -2.488350000000 | 3.274936000000 |
| H | 4.203030000000  | -2.162607000000 | 3.162204000000 |
| C | 2.551881000000  | -1.830050000000 | 4.523136000000 |
| H | 1.475212000000  | -2.087139000000 | 4.579775000000 |
| H | 2.637647000000  | -0.731347000000 | 4.450133000000 |
| C | 3.271715000000  | -2.344680000000 | 5.784847000000 |
| H | 4.330550000000  | -2.013481000000 | 5.756334000000 |
| H | 2.820713000000  | -1.880826000000 | 6.680853000000 |
| C | 3.214261000000  | -3.878091000000 | 5.878276000000 |
| H | 3.761772000000  | -4.229820000000 | 6.771886000000 |
| H | 2.158963000000  | -4.192231000000 | 6.001515000000 |
| C | 3.789848000000  | -4.532967000000 | 4.611982000000 |
| H | 3.693663000000  | -5.632857000000 | 4.666078000000 |
| H | 4.873884000000  | -4.313873000000 | 4.543956000000 |
| C | 3.082169000000  | -4.019134000000 | 3.343769000000 |
| H | 3.536465000000  | -4.463031000000 | 2.437765000000 |
| H | 2.017160000000  | -4.318833000000 | 3.365008000000 |
| C | 0.301356000000  | 3.534469000000  | 3.129255000000 |
| H | -0.777638000000 | 3.776526000000  | 3.139662000000 |
| C | 0.634083000000  | 2.668322000000  | 4.348604000000 |
| H | 1.696249000000  | 2.364838000000  | 4.301880000000 |
| H | 0.013019000000  | 1.756332000000  | 4.337207000000 |
| C | 1.112692000000  | 4.836514000000  | 3.112658000000 |
| H | 0.849767000000  | 5.441756000000  | 2.227556000000 |
| H | 2.188548000000  | 4.593689000000  | 3.031689000000 |
| C | 4.338115000000  | 2.091921000000  | 2.661852000000 |
| C | 4.969149000000  | 3.334210000000  | 3.358603000000 |
| C | -1.217354000000 | -4.920863000000 | 3.099932000000 |
| C | -3.064184000000 | 1.921391000000  | 3.005520000000 |

|    |                 |                 |                 |
|----|-----------------|-----------------|-----------------|
| C  | -3.954840000000 | 2.323803000000  | 4.218378000000  |
| C  | 1.189622000000  | -6.137474000000 | 0.510484000000  |
| H  | 1.071845000000  | -5.720959000000 | 1.515343000000  |
| C  | 0.184467000000  | -6.932911000000 | -0.046041000000 |
| H  | -0.710764000000 | -7.141125000000 | 0.545443000000  |
| C  | 0.323576000000  | -7.404028000000 | -1.368081000000 |
| C  | 1.539060000000  | -7.111773000000 | -2.026612000000 |
| H  | 1.712877000000  | -7.445113000000 | -3.054421000000 |
| C  | 2.488000000000  | -6.302684000000 | -1.395994000000 |
| H  | 3.405321000000  | -5.993454000000 | -1.909029000000 |
| C  | 3.696363000000  | 5.409313000000  | -1.981196000000 |
| H  | 2.679358000000  | 5.801740000000  | -2.059050000000 |
| C  | 4.661379000000  | 5.696748000000  | -2.948005000000 |
| H  | 4.398677000000  | 6.334526000000  | -3.796998000000 |
| C  | 5.959565000000  | 5.161241000000  | -2.819415000000 |
| C  | 6.224828000000  | 4.393677000000  | -1.667285000000 |
| H  | 7.208642000000  | 3.940972000000  | -1.511828000000 |
| C  | 5.202544000000  | 4.136190000000  | -0.750802000000 |
| H  | 5.355759000000  | 3.492115000000  | 0.122166000000  |
| C  | 6.355090000000  | -0.701737000000 | 2.175134000000  |
| H  | 6.238702000000  | 0.380200000000  | 2.275630000000  |
| C  | 7.015761000000  | -1.455495000000 | 3.147107000000  |
| H  | 7.435341000000  | -0.952454000000 | 4.023121000000  |
| C  | 6.613379000000  | -3.404949000000 | 1.800915000000  |
| H  | 6.663853000000  | -4.481201000000 | 1.611104000000  |
| C  | 5.963889000000  | -2.583553000000 | 0.875504000000  |
| H  | 5.538093000000  | -3.002305000000 | -0.042408000000 |
| C  | 7.133265000000  | -2.852114000000 | 2.988657000000  |
| C  | 0.379426000000  | 3.469853000000  | 5.640539000000  |
| H  | -0.704225000000 | 3.690192000000  | 5.727796000000  |
| H  | 0.645941000000  | 2.847662000000  | 6.514296000000  |
| C  | 1.175925000000  | 4.785635000000  | 5.651067000000  |
| H  | 0.961136000000  | 5.359582000000  | 6.570965000000  |
| H  | 2.258592000000  | 4.553228000000  | 5.658950000000  |
| C  | 0.857751000000  | 5.632074000000  | 4.408338000000  |
| H  | 1.465269000000  | 6.556432000000  | 4.398112000000  |
| H  | -0.203621000000 | 5.950560000000  | 4.436522000000  |
| Ag | 1.775824000000  | 0.520974000000  | 1.917583000000  |
| Ag | -0.114579000000 | -2.197669000000 | 1.978512000000  |
| Ag | -1.025213000000 | 0.458008000000  | 1.390121000000  |
| Ag | 2.589875000000  | -3.427895000000 | -0.196127000000 |
| Ag | 4.044549000000  | -0.124953000000 | 0.163449000000  |
| F  | -3.851581000000 | 3.667422000000  | 4.454815000000  |
| F  | -3.631828000000 | 1.682374000000  | 5.363751000000  |
| F  | -5.269039000000 | 2.055870000000  | 3.953602000000  |
| N  | 2.312732000000  | -5.780824000000 | -0.156394000000 |
| N  | 3.943548000000  | 4.613920000000  | -0.912158000000 |
| N  | 5.803047000000  | -1.250680000000 | 1.065894000000  |
| O  | 3.569939000000  | 1.376181000000  | 3.358827000000  |
| O  | -0.404432000000 | -4.031918000000 | 3.476608000000  |
| O  | -2.071537000000 | 1.183885000000  | 3.287254000000  |
| O  | 4.695106000000  | 1.952468000000  | 1.452345000000  |
| O  | -1.537409000000 | -5.291632000000 | 1.931530000000  |
| O  | -3.433683000000 | 2.376392000000  | 1.891499000000  |
| S  | 2.311584000000  | -1.878296000000 | 1.725544000000  |
| S  | -2.514297000000 | -1.788739000000 | 1.303977000000  |
| S  | 0.517882000000  | 2.622790000000  | 1.503074000000  |

|    |                 |                 |                 |
|----|-----------------|-----------------|-----------------|
| Ag | 2.243011000000  | 3.480702000000  | 0.004524000000  |
| C  | -1.967350000000 | -5.695277000000 | 4.224383000000  |
| C  | -3.066004000000 | -1.880197000000 | 4.103488000000  |
| H  | -2.813399000000 | -0.808086000000 | 4.181280000000  |
| H  | -2.127756000000 | -2.447668000000 | 4.229260000000  |
| C  | -3.676050000000 | -2.160142000000 | 2.723755000000  |
| C  | -4.074493000000 | -2.271080000000 | 5.203122000000  |
| H  | -4.236900000000 | -3.366546000000 | 5.174189000000  |
| H  | -3.639334000000 | -2.042191000000 | 6.192911000000  |
| C  | -6.004663000000 | -1.791503000000 | 3.626124000000  |
| H  | -6.941743000000 | -1.222406000000 | 3.482039000000  |
| H  | -6.268768000000 | -2.863035000000 | 3.517974000000  |
| C  | -5.418236000000 | -1.543513000000 | 5.025318000000  |
| H  | -6.135402000000 | -1.866248000000 | 5.802096000000  |
| H  | -5.264177000000 | -0.456411000000 | 5.163933000000  |
| C  | -4.997682000000 | -1.408719000000 | 2.525492000000  |
| H  | -5.415496000000 | -1.621427000000 | 1.526024000000  |
| H  | -4.802166000000 | -0.320038000000 | 2.567869000000  |
| H  | -3.855211000000 | -3.247599000000 | 2.623979000000  |
| C  | -3.021292000000 | 2.213713000000  | -3.209357000000 |
| H  | -3.779698000000 | 1.413790000000  | -3.289578000000 |
| C  | -2.200211000000 | 2.263939000000  | -4.502473000000 |
| H  | -1.375636000000 | 2.990681000000  | -4.389263000000 |
| H  | -1.744225000000 | 1.276287000000  | -4.691553000000 |
| C  | -3.104510000000 | 2.679863000000  | -5.679673000000 |
| H  | -3.865421000000 | 1.893210000000  | -5.853696000000 |
| H  | -2.497143000000 | 2.743672000000  | -6.600799000000 |
| C  | -3.802202000000 | 4.020767000000  | -5.398004000000 |
| H  | -4.457863000000 | 4.299884000000  | -6.242967000000 |
| H  | -3.034693000000 | 4.814449000000  | -5.308335000000 |
| C  | -4.613719000000 | 3.957445000000  | -4.093575000000 |
| H  | -5.084355000000 | 4.934102000000  | -3.876395000000 |
| H  | -5.438360000000 | 3.223870000000  | -4.204781000000 |
| C  | -3.725009000000 | 3.542468000000  | -2.904286000000 |
| H  | -4.323824000000 | 3.450202000000  | -1.979467000000 |
| H  | -2.963181000000 | 4.323806000000  | -2.720746000000 |
| C  | 0.208614000000  | -3.922254000000 | -3.241180000000 |
| H  | 0.925674000000  | -4.756014000000 | -3.126864000000 |
| C  | 0.650510000000  | -3.024441000000 | -4.403328000000 |
| H  | -0.009019000000 | -2.139293000000 | -4.443218000000 |
| H  | 1.686068000000  | -2.678920000000 | -4.241429000000 |
| C  | -1.199580000000 | -4.489192000000 | -3.453147000000 |
| H  | -1.478482000000 | -5.145316000000 | -2.608726000000 |
| H  | -1.912886000000 | -3.645945000000 | -3.469084000000 |
| C  | -3.174990000000 | -1.229214000000 | -3.618022000000 |
| C  | -3.935304000000 | -1.398526000000 | -4.964424000000 |
| C  | 0.410943000000  | 4.690405000000  | -2.743165000000 |
| C  | 4.505110000000  | -2.931695000000 | -2.700167000000 |
| C  | 5.897770000000  | -3.011358000000 | -3.393096000000 |
| C  | -1.127745000000 | 6.425295000000  | 0.609605000000  |
| H  | -0.482170000000 | 6.287077000000  | -0.264126000000 |
| C  | -1.072169000000 | 7.574997000000  | 1.400573000000  |
| H  | -0.388207000000 | 8.383070000000  | 1.124641000000  |
| C  | -1.892016000000 | 7.684642000000  | 2.542633000000  |
| C  | -2.774120000000 | 6.616276000000  | 2.803084000000  |
| H  | -3.421660000000 | 6.623221000000  | 3.684844000000  |
| C  | -2.776938000000 | 5.501072000000  | 1.963095000000  |

|    |                 |                 |                 |
|----|-----------------|-----------------|-----------------|
| H  | -3.419619000000 | 4.638453000000  | 2.158890000000  |
| C  | -4.326050000000 | -5.163015000000 | 0.712088000000  |
| H  | -3.740579000000 | -5.753716000000 | 1.422362000000  |
| C  | -5.635455000000 | -4.772000000000 | 1.001816000000  |
| H  | -6.089741000000 | -5.084253000000 | 1.946963000000  |
| C  | -6.315776000000 | -3.899533000000 | 0.125440000000  |
| C  | -5.645662000000 | -3.534640000000 | -1.059529000000 |
| H  | -6.105930000000 | -2.873813000000 | -1.798663000000 |
| C  | -4.346440000000 | -3.995148000000 | -1.284075000000 |
| H  | -3.806261000000 | -3.691202000000 | -2.182587000000 |
| C  | -6.171146000000 | 0.624152000000  | -1.759467000000 |
| H  | -5.676050000000 | -0.017734000000 | -2.495802000000 |
| C  | -7.442635000000 | 1.156282000000  | -1.987332000000 |
| H  | -7.951055000000 | 0.949247000000  | -2.933885000000 |
| C  | -7.302248000000 | 2.218964000000  | 0.164450000000  |
| H  | -7.718336000000 | 2.826921000000  | 0.973409000000  |
| C  | -6.031971000000 | 1.655802000000  | 0.315525000000  |
| H  | -5.422714000000 | 1.853767000000  | 1.202967000000  |
| C  | -8.048584000000 | 1.966320000000  | -1.004541000000 |
| C  | 0.553408000000  | -3.798884000000 | -5.734001000000 |
| H  | 1.287685000000  | -4.630465000000 | -5.730017000000 |
| H  | 0.841151000000  | -3.128670000000 | -6.564344000000 |
| C  | -0.857306000000 | -4.366210000000 | -5.961130000000 |
| H  | -0.893643000000 | -4.937966000000 | -6.906348000000 |
| H  | -1.573855000000 | -3.527922000000 | -6.063976000000 |
| C  | -1.285745000000 | -5.257370000000 | -4.784032000000 |
| H  | -2.316331000000 | -5.631647000000 | -4.925166000000 |
| H  | -0.631763000000 | -6.151502000000 | -4.733256000000 |
| Ag | -0.892382000000 | -0.764845000000 | -1.670818000000 |
| Ag | 0.471226000000  | 1.725869000000  | -2.118339000000 |
| Ag | 1.953604000000  | -1.103215000000 | -1.829125000000 |
| Ag | -1.589912000000 | 3.373496000000  | -0.015504000000 |
| Ag | -3.375929000000 | -0.079535000000 | -0.325261000000 |
| F  | 6.445516000000  | -4.246798000000 | -3.322425000000 |
| F  | 5.853197000000  | -2.648105000000 | -4.698043000000 |
| F  | 6.747865000000  | -2.143775000000 | -2.752370000000 |
| N  | -1.956339000000 | 5.389895000000  | 0.890936000000  |
| N  | -3.665529000000 | -4.765465000000 | -0.403557000000 |
| N  | -5.472971000000 | 0.854696000000  | -0.621502000000 |
| O  | -1.918758000000 | -1.093758000000 | -3.713638000000 |
| O  | 0.695636000000  | 3.702822000000  | -3.475859000000 |
| O  | 3.700641000000  | -2.099644000000 | -3.195601000000 |
| O  | -3.908250000000 | -1.269539000000 | -2.594718000000 |
| O  | 0.562239000000  | 4.843577000000  | -1.494730000000 |
| O  | 4.394015000000  | -3.671532000000 | -1.674007000000 |
| S  | -1.995863000000 | 1.691038000000  | -1.733037000000 |
| S  | 2.821495000000  | 1.202061000000  | -1.548915000000 |
| S  | 0.302848000000  | -3.052200000000 | -1.582316000000 |
| Ag | -1.452374000000 | -3.889134000000 | -0.017352000000 |
| F  | -4.949165000000 | -0.483109000000 | -5.056161000000 |
| F  | -4.496262000000 | -2.640034000000 | -5.028316000000 |
| F  | -3.147399000000 | -1.245746000000 | -6.053316000000 |
| C  | -0.214591000000 | 5.926945000000  | -3.454653000000 |
| F  | 0.648293000000  | 6.985116000000  | -3.398272000000 |
| F  | -1.369800000000 | 6.311478000000  | -2.827698000000 |
| F  | -0.517897000000 | 5.708286000000  | -4.754900000000 |
| C  | 3.264247000000  | 1.176757000000  | -4.344401000000 |

|   |                  |                 |                 |
|---|------------------|-----------------|-----------------|
| H | 3.118977000000   | 0.079831000000  | -4.327395000000 |
| H | 2.274166000000   | 1.654635000000  | -4.458339000000 |
| C | 3.903851000000   | 1.612057000000  | -3.020431000000 |
| C | 4.184615000000   | 1.554796000000  | -5.521659000000 |
| H | 4.265746000000   | 2.660066000000  | -5.580610000000 |
| H | 3.723592000000   | 1.221174000000  | -6.469135000000 |
| C | 6.216570000000   | 1.369457000000  | -4.018987000000 |
| H | 7.197232000000   | 0.878663000000  | -3.880020000000 |
| H | 6.403946000000   | 2.461494000000  | -4.029777000000 |
| C | 5.586152000000   | 0.945371000000  | -5.354803000000 |
| H | 6.238060000000   | 1.247258000000  | -6.194983000000 |
| H | 5.510537000000   | -0.158198000000 | -5.382245000000 |
| C | 5.303109000000   | 1.014937000000  | -2.830337000000 |
| H | 5.744056000000   | 1.373285000000  | -1.881936000000 |
| H | 5.210055000000   | -0.082859000000 | -2.757174000000 |
| H | 3.956411000000   | 2.716496000000  | -2.989214000000 |
| F | -1.611565000000  | -7.006836000000 | 4.228833000000  |
| F | -1.739526000000  | -5.192083000000 | 5.456718000000  |
| F | -3.322368000000  | -5.637449000000 | 4.005584000000  |
| F | 4.681538000000   | 4.475894000000  | 2.656123000000  |
| F | 4.528494000000   | 3.521354000000  | 4.624670000000  |
| F | 6.325712000000   | 3.214324000000  | 3.401023000000  |
| C | -1.807965000000  | 8.854349000000  | 3.446569000000  |
| C | -2.951857000000  | 9.391664000000  | 4.069398000000  |
| C | -0.571004000000  | 9.466438000000  | 3.732699000000  |
| C | -2.806959000000  | 10.492506000000 | 4.923341000000  |
| H | -3.944239000000  | 8.974250000000  | 3.870846000000  |
| C | -0.540037000000  | 10.560138000000 | 4.607153000000  |
| H | 0.357592000000   | 9.074443000000  | 3.305283000000  |
| H | -3.688803000000  | 10.928809000000 | 5.409830000000  |
| H | 0.415972000000   | 11.042461000000 | 4.848085000000  |
| C | -9.413157000000  | 2.512695000000  | -1.185951000000 |
| C | -10.423521000000 | 1.759950000000  | -1.817926000000 |
| C | -9.760536000000  | 3.798054000000  | -0.724820000000 |
| C | -11.702505000000 | 2.315759000000  | -1.952033000000 |
| H | -10.225043000000 | 0.743309000000  | -2.172911000000 |
| C | -11.069222000000 | 4.258360000000  | -0.917963000000 |
| H | -9.014479000000  | 4.441328000000  | -0.247245000000 |
| H | -12.503226000000 | 1.738689000000  | -2.431772000000 |
| H | -11.354159000000 | 5.260655000000  | -0.573334000000 |
| C | 7.744503000000   | -3.701896000000 | 4.035854000000  |
| C | 7.551640000000   | -3.420739000000 | 5.404086000000  |
| C | 8.516386000000   | -4.835651000000 | 3.713581000000  |
| C | 8.123255000000   | -4.270323000000 | 6.359798000000  |
| H | 6.935209000000   | -2.572423000000 | 5.719363000000  |
| C | 9.047114000000   | -5.613098000000 | 4.751065000000  |
| H | 8.722081000000   | -5.094521000000 | 2.670036000000  |
| H | 7.972828000000   | -4.072364000000 | 7.428766000000  |
| H | 9.657236000000   | -6.495029000000 | 4.517782000000  |
| C | -0.783573000000  | -8.100734000000 | -2.055734000000 |
| C | -2.127189000000  | -7.742023000000 | -1.813223000000 |
| C | -0.548727000000  | -9.111954000000 | -3.013863000000 |
| C | -3.139623000000  | -8.381754000000 | -2.533785000000 |
| H | -2.371196000000  | -6.940462000000 | -1.106559000000 |
| H | 0.477962000000   | -9.450815000000 | -3.208098000000 |
| C | -2.781782000000  | -9.359861000000 | -3.474636000000 |
| H | -4.189690000000  | -8.113311000000 | -2.380349000000 |

|   |                  |                 |                 |
|---|------------------|-----------------|-----------------|
| H | -3.550984000000  | -9.869070000000 | -4.069124000000 |
| C | -7.642561000000  | -3.339677000000 | 0.474616000000  |
| C | -7.985167000000  | -2.018343000000 | 0.120325000000  |
| C | -8.594126000000  | -4.071582000000 | 1.212070000000  |
| C | -9.225670000000  | -1.504675000000 | 0.518250000000  |
| H | -7.281395000000  | -1.385908000000 | -0.427990000000 |
| C | -9.808576000000  | -3.461430000000 | 1.552616000000  |
| H | -8.402005000000  | -5.109812000000 | 1.500949000000  |
| H | -9.498039000000  | -0.472297000000 | 0.261490000000  |
| H | -10.561227000000 | -4.021141000000 | 2.122558000000  |
| C | 6.985912000000   | 5.357309000000  | -3.868484000000 |
| C | 6.638271000000   | 5.340894000000  | -5.234685000000 |
| C | 8.347101000000   | 5.534377000000  | -3.551160000000 |
| C | 7.647006000000   | 5.496541000000  | -6.194049000000 |
| H | 5.601608000000   | 5.173982000000  | -5.545372000000 |
| C | 9.272255000000   | 5.687429000000  | -4.591748000000 |
| H | 8.677260000000   | 5.576744000000  | -2.508261000000 |
| H | 7.395495000000   | 5.474919000000  | -7.262112000000 |
| H | 10.335461000000  | 5.834688000000  | -4.362625000000 |
| N | -1.629081000000  | 11.082899000000 | 5.202929000000  |
| N | -12.041234000000 | 3.544776000000  | -1.518200000000 |
| N | -10.139869000000 | -2.197386000000 | 1.225117000000  |
| N | 8.864312000000   | -5.354296000000 | 6.060221000000  |
| N | -1.510026000000  | -9.734276000000 | -3.714794000000 |
| N | 8.949722000000   | 5.670246000000  | -5.899397000000 |
| H | -0.254290000000  | -0.240355000000 | -0.066737000000 |

### Ag<sub>12</sub>-Azopy-AgH

|   |                 |                 |                 |
|---|-----------------|-----------------|-----------------|
| C | 3.996413000000  | -0.274244000000 | 3.094918000000  |
| H | 4.451723000000  | 0.694969000000  | 2.823411000000  |
| C | 3.264235000000  | -0.130767000000 | 4.432977000000  |
| H | 2.711011000000  | -1.058295000000 | 4.657257000000  |
| H | 2.526887000000  | 0.687376000000  | 4.366923000000  |
| C | 4.283297000000  | 0.156050000000  | 5.552781000000  |
| H | 4.760570000000  | 1.139189000000  | 5.370238000000  |
| H | 3.748974000000  | 0.236034000000  | 6.516799000000  |
| C | 5.360219000000  | -0.939003000000 | 5.618120000000  |
| H | 6.089243000000  | -0.718809000000 | 6.419366000000  |
| H | 4.877500000000  | -1.902855000000 | 5.876109000000  |
| C | 6.081753000000  | -1.079902000000 | 4.268365000000  |
| H | 6.828281000000  | -1.894941000000 | 4.303700000000  |
| H | 6.640976000000  | -0.148345000000 | 4.048495000000  |
| C | 5.081029000000  | -1.358689000000 | 3.127926000000  |
| H | 5.600829000000  | -1.412610000000 | 2.154480000000  |
| H | 4.597065000000  | -2.340164000000 | 3.294706000000  |
| C | -0.268579000000 | 5.015075000000  | 1.259248000000  |
| H | -1.128870000000 | 5.583680000000  | 0.861587000000  |
| C | -0.449261000000 | 4.816054000000  | 2.769224000000  |
| H | 0.351482000000  | 4.154407000000  | 3.147630000000  |
| H | -1.413608000000 | 4.319783000000  | 2.973139000000  |
| C | 1.031401000000  | 5.751262000000  | 0.909548000000  |
| H | 1.095728000000  | 5.909123000000  | -0.183207000000 |
| H | 1.890527000000  | 5.114335000000  | 1.190094000000  |
| C | 3.181245000000  | 3.230162000000  | 2.741876000000  |
| C | 4.364042000000  | 4.063234000000  | 3.308178000000  |
| C | 0.779782000000  | -3.336908000000 | 4.003930000000  |

|    |                 |                 |                 |
|----|-----------------|-----------------|-----------------|
| C  | -4.136611000000 | 2.669248000000  | 2.197154000000  |
| C  | -5.368828000000 | 3.155192000000  | 3.014320000000  |
| C  | 2.182296000000  | -5.972771000000 | 1.358311000000  |
| H  | 1.625799000000  | -5.603714000000 | 2.226329000000  |
| C  | 1.924867000000  | -7.231290000000 | 0.807671000000  |
| H  | 1.175477000000  | -7.894426000000 | 1.248216000000  |
| C  | 2.577354000000  | -7.600266000000 | -0.382832000000 |
| C  | 3.562628000000  | -6.739854000000 | -0.910572000000 |
| H  | 4.107872000000  | -7.010269000000 | -1.817610000000 |
| C  | 3.788873000000  | -5.521963000000 | -0.272726000000 |
| H  | 4.528211000000  | -4.812219000000 | -0.651731000000 |
| C  | 3.284949000000  | 4.528239000000  | -3.519353000000 |
| H  | 2.422914000000  | 4.811858000000  | -4.133523000000 |
| C  | 4.531416000000  | 4.246893000000  | -4.087978000000 |
| H  | 4.692899000000  | 4.306037000000  | -5.167952000000 |
| C  | 5.563495000000  | 3.788028000000  | -3.248133000000 |
| C  | 5.345091000000  | 3.761800000000  | -1.855614000000 |
| H  | 6.140696000000  | 3.443518000000  | -1.178929000000 |
| C  | 4.077108000000  | 4.084675000000  | -1.375894000000 |
| H  | 3.848808000000  | 4.020174000000  | -0.306387000000 |
| C  | 6.176309000000  | 1.510283000000  | 0.923863000000  |
| H  | 5.387517000000  | 2.246118000000  | 1.114974000000  |
| C  | 7.356036000000  | 1.506455000000  | 1.663225000000  |
| H  | 7.525291000000  | 2.243163000000  | 2.451160000000  |
| C  | 8.053362000000  | -0.416934000000 | 0.364306000000  |
| H  | 8.787523000000  | -1.193254000000 | 0.130251000000  |
| C  | 6.831982000000  | -0.353228000000 | -0.312614000000 |
| H  | 6.564636000000  | -1.082670000000 | -1.080881000000 |
| C  | 8.313757000000  | 0.505587000000  | 1.395201000000  |
| C  | -0.377104000000 | 6.178412000000  | 3.486647000000  |
| H  | -1.233118000000 | 6.809176000000  | 3.169187000000  |
| H  | -0.484215000000 | 6.021241000000  | 4.575194000000  |
| C  | 0.937786000000  | 6.910269000000  | 3.171560000000  |
| H  | 0.963230000000  | 7.891313000000  | 3.680592000000  |
| H  | 1.786747000000  | 6.320137000000  | 3.570268000000  |
| C  | 1.110568000000  | 7.097440000000  | 1.655519000000  |
| H  | 2.079446000000  | 7.580767000000  | 1.429107000000  |
| H  | 0.321208000000  | 7.773735000000  | 1.270437000000  |
| Ag | 1.422884000000  | 1.637869000000  | 1.136042000000  |
| Ag | 0.279373000000  | -0.806708000000 | 2.284870000000  |
| Ag | -1.484385000000 | 1.414690000000  | 1.611114000000  |
| Ag | 2.701388000000  | -2.924962000000 | 0.968636000000  |
| Ag | 3.731338000000  | 0.254679000000  | -0.560157000000 |
| F  | -5.844111000000 | 4.330192000000  | 2.504279000000  |
| F  | -5.106382000000 | 3.350915000000  | 4.324787000000  |
| F  | -6.376615000000 | 2.235050000000  | 2.926490000000  |
| N  | 3.081612000000  | -5.114657000000 | 0.814334000000  |
| N  | 3.041880000000  | 4.416214000000  | -2.191986000000 |
| N  | 5.899525000000  | 0.587967000000  | -0.034963000000 |
| O  | 2.260476000000  | 2.910828000000  | 3.519130000000  |
| O  | 0.602234000000  | -2.095480000000 | 4.180831000000  |
| O  | -3.054148000000 | 2.556431000000  | 2.845331000000  |
| O  | 3.315232000000  | 2.922550000000  | 1.501496000000  |
| O  | 0.253244000000  | -4.122713000000 | 3.166679000000  |
| O  | -4.371784000000 | 2.436706000000  | 0.978315000000  |
| S  | 2.811322000000  | -0.605757000000 | 1.682409000000  |
| S  | -2.371104000000 | -0.972384000000 | 2.236078000000  |

|    |                 |                 |                 |
|----|-----------------|-----------------|-----------------|
| S  | -0.355596000000 | 3.386962000000  | 0.342611000000  |
| Ag | 1.052139000000  | 3.323852000000  | -1.682147000000 |
| C  | 1.871296000000  | -3.992729000000 | 4.905969000000  |
| C  | -2.290646000000 | -0.053295000000 | 4.897293000000  |
| H  | -2.390718000000 | 0.973111000000  | 4.498550000000  |
| H  | -1.217162000000 | -0.313906000000 | 4.909426000000  |
| C  | -3.049144000000 | -1.022130000000 | 3.979239000000  |
| C  | -2.873603000000 | -0.106890000000 | 6.323176000000  |
| H  | -2.687672000000 | -1.109315000000 | 6.759747000000  |
| H  | -2.339309000000 | 0.620414000000  | 6.960972000000  |
| C  | -5.127178000000 | -0.804856000000 | 5.403427000000  |
| H  | -6.208110000000 | -0.573686000000 | 5.373291000000  |
| H  | -5.036419000000 | -1.834252000000 | 5.804487000000  |
| C  | -4.384491000000 | 0.178274000000  | 6.321593000000  |
| H  | -4.787740000000 | 0.120767000000  | 7.349287000000  |
| H  | -4.560360000000 | 1.211643000000  | 5.963301000000  |
| C  | -4.560805000000 | -0.760806000000 | 3.970683000000  |
| H  | -5.070570000000 | -1.499940000000 | 3.326873000000  |
| H  | -4.752333000000 | 0.235514000000  | 3.532121000000  |
| H  | -2.855570000000 | -2.060976000000 | 4.305021000000  |
| C  | -3.830146000000 | 0.203783000000  | -3.175723000000 |
| H  | -4.431531000000 | -0.682786000000 | -2.904999000000 |
| C  | -3.029398000000 | -0.090572000000 | -4.446827000000 |
| H  | -2.363655000000 | 0.763683000000  | -4.669038000000 |
| H  | -2.402884000000 | -0.985401000000 | -4.291512000000 |
| C  | -3.999547000000 | -0.320661000000 | -5.623405000000 |
| H  | -4.589767000000 | -1.238183000000 | -5.430984000000 |
| H  | -3.415643000000 | -0.504279000000 | -6.543658000000 |
| C  | -4.945152000000 | 0.876803000000  | -5.815248000000 |
| H  | -5.650853000000 | 0.681081000000  | -6.643277000000 |
| H  | -4.349612000000 | 1.765357000000  | -6.100554000000 |
| C  | -5.716938000000 | 1.184669000000  | -4.521973000000 |
| H  | -6.359060000000 | 2.075684000000  | -4.649566000000 |
| H  | -6.391052000000 | 0.338310000000  | -4.279749000000 |
| C  | -4.752175000000 | 1.416679000000  | -3.341842000000 |
| H  | -5.315484000000 | 1.605381000000  | -2.411103000000 |
| H  | -4.135139000000 | 2.313431000000  | -3.540193000000 |
| C  | 0.235858000000  | -4.807485000000 | -1.441317000000 |
| H  | 1.148795000000  | -5.353795000000 | -1.146481000000 |
| C  | 0.275208000000  | -4.550329000000 | -2.951332000000 |
| H  | -0.586941000000 | -3.918658000000 | -3.232125000000 |
| H  | 1.200729000000  | -4.012435000000 | -3.217050000000 |
| C  | -1.001099000000 | -5.605966000000 | -1.009903000000 |
| H  | -0.962227000000 | -5.808947000000 | 0.076788000000  |
| H  | -1.901549000000 | -4.989995000000 | -1.187889000000 |
| C  | -3.676213000000 | -3.273868000000 | -2.273416000000 |
| C  | -4.834514000000 | -3.983425000000 | -3.032685000000 |
| C  | -0.678014000000 | 3.406318000000  | -4.305839000000 |
| C  | 4.184032000000  | -2.705498000000 | -2.306004000000 |
| C  | 5.411311000000  | -3.220109000000 | -3.120623000000 |
| C  | -2.212419000000 | 5.850355000000  | -1.616353000000 |
| H  | -1.589402000000 | 5.440553000000  | -2.419459000000 |
| C  | -2.042607000000 | 7.160395000000  | -1.170583000000 |
| H  | -1.290528000000 | 7.812584000000  | -1.620450000000 |
| C  | -2.835527000000 | 7.623175000000  | -0.098039000000 |
| C  | -3.817432000000 | 6.764102000000  | 0.429611000000  |
| H  | -4.460771000000 | 7.102104000000  | 1.246595000000  |



|    |                 |                 |                 |
|----|-----------------|-----------------|-----------------|
| C  | -3.909896000000 | 5.461573000000  | -0.066396000000 |
| H  | -4.618825000000 | 4.744102000000  | 0.354778000000  |
| C  | -2.926022000000 | -4.662571000000 | 3.645361000000  |
| H  | -1.904998000000 | -4.779307000000 | 4.024786000000  |
| C  | -4.032555000000 | -4.712518000000 | 4.491643000000  |
| H  | -3.921277000000 | -4.873605000000 | 5.566491000000  |
| C  | -5.314614000000 | -4.519393000000 | 3.933064000000  |
| C  | -5.424534000000 | -4.357364000000 | 2.539727000000  |
| H  | -6.409937000000 | -4.232824000000 | 2.081411000000  |
| C  | -4.259068000000 | -4.295375000000 | 1.770430000000  |
| H  | -4.293479000000 | -4.099117000000 | 0.693153000000  |
| C  | -6.598837000000 | -1.446292000000 | -0.984010000000 |
| H  | -6.026664000000 | -2.377549000000 | -0.955091000000 |
| C  | -7.738964000000 | -1.308054000000 | -1.779211000000 |
| H  | -8.092237000000 | -2.135458000000 | -2.399904000000 |
| C  | -7.917941000000 | 0.975876000000  | -0.993634000000 |
| H  | -8.423264000000 | 1.944254000000  | -0.986525000000 |
| C  | -6.769785000000 | 0.757710000000  | -0.236130000000 |
| H  | -6.323188000000 | 1.547408000000  | 0.375860000000  |
| C  | -8.407403000000 | -0.071273000000 | -1.803524000000 |
| C  | 0.197377000000  | -5.892128000000 | -3.707661000000 |
| H  | 1.098787000000  | -6.498554000000 | -3.481470000000 |
| H  | 0.210136000000  | -5.695045000000 | -4.795313000000 |
| C  | -1.061219000000 | -6.683701000000 | -3.317012000000 |
| H  | -1.089053000000 | -7.650276000000 | -3.853600000000 |
| H  | -1.960847000000 | -6.115409000000 | -3.623691000000 |
| C  | -1.106121000000 | -6.925635000000 | -1.799664000000 |
| H  | -2.039619000000 | -7.445131000000 | -1.514033000000 |
| H  | -0.271686000000 | -7.593513000000 | -1.509691000000 |
| Ag | -1.436427000000 | -1.697049000000 | -1.274647000000 |
| Ag | -0.379902000000 | 0.799444000000  | -2.321205000000 |
| Ag | 1.452531000000  | -1.387162000000 | -1.678675000000 |
| Ag | -2.579721000000 | 2.795069000000  | -0.965364000000 |
| Ag | -3.992833000000 | -0.519829000000 | 0.472850000000  |
| F  | 5.986486000000  | -4.298958000000 | -2.510994000000 |
| F  | 5.107235000000  | -3.578899000000 | -4.387249000000 |
| F  | 6.368290000000  | -2.239086000000 | -3.193506000000 |
| N  | -3.108365000000 | 4.993742000000  | -1.054808000000 |
| N  | -3.022700000000 | -4.421647000000 | 2.312226000000  |
| N  | -6.105840000000 | -0.430163000000 | -0.236405000000 |
| O  | -2.674466000000 | -2.978020000000 | -2.980763000000 |
| O  | -0.500693000000 | 2.162689000000  | -4.388957000000 |
| O  | 3.084967000000  | -2.678347000000 | -2.924937000000 |
| O  | -3.874436000000 | -3.029538000000 | -1.046085000000 |
| O  | -0.133296000000 | 4.258417000000  | -3.536827000000 |
| O  | 4.459018000000  | -2.356791000000 | -1.119353000000 |
| S  | -2.738251000000 | 0.444046000000  | -1.667037000000 |
| S  | 2.114601000000  | 0.949989000000  | -2.296910000000 |
| S  | 0.351726000000  | -3.225482000000 | -0.434220000000 |
| Ag | -1.286849000000 | -3.183680000000 | 1.420028000000  |
| F  | -5.598151000000 | -3.045903000000 | -3.684839000000 |
| F  | -5.669453000000 | -4.652853000000 | -2.189860000000 |
| F  | -4.385647000000 | -4.863536000000 | -3.956299000000 |
| C  | -1.783578000000 | 4.005748000000  | -5.228660000000 |
| F  | -1.420773000000 | 5.195102000000  | -5.764778000000 |
| F  | -2.916950000000 | 4.225067000000  | -4.476881000000 |
| F  | -2.133279000000 | 3.177489000000  | -6.242370000000 |

|   |                  |                 |                 |
|---|------------------|-----------------|-----------------|
| C | 2.024415000000   | -0.094110000000 | -4.935998000000 |
| H | 2.087343000000   | -1.108141000000 | -4.497563000000 |
| H | 0.962024000000   | 0.202011000000  | -4.980632000000 |
| C | 2.797815000000   | 0.881879000000  | -4.042286000000 |
| C | 2.640741000000   | -0.110962000000 | -6.349696000000 |
| H | 2.494216000000   | 0.880519000000  | -6.824469000000 |
| H | 2.096216000000   | -0.842583000000 | -6.973813000000 |
| C | 4.901593000000   | 0.534352000000  | -5.400996000000 |
| H | 5.970770000000   | 0.260625000000  | -5.333269000000 |
| H | 4.861966000000   | 1.555160000000  | -5.832728000000 |
| C | 4.141492000000   | -0.445047000000 | -6.309944000000 |
| H | 4.565256000000   | -0.428505000000 | -7.330687000000 |
| H | 4.277025000000   | -1.472820000000 | -5.920465000000 |
| C | 4.293762000000   | 0.552730000000  | -3.986941000000 |
| H | 4.826043000000   | 1.267126000000  | -3.336885000000 |
| H | 4.417863000000   | -0.444524000000 | -3.531855000000 |
| H | 2.647738000000   | 1.914845000000  | -4.408132000000 |
| F | 3.022548000000   | -4.143158000000 | 4.165168000000  |
| F | 2.189807000000   | -3.249702000000 | 5.990460000000  |
| F | 1.504229000000   | -5.226550000000 | 5.330467000000  |
| F | 4.916392000000   | 4.879074000000  | 2.368326000000  |
| F | 4.001477000000   | 4.827030000000  | 4.359415000000  |
| F | 5.358553000000   | 3.210460000000  | 3.729262000000  |
| N | -9.533393000000  | 0.013986000000  | -2.664316000000 |
| N | -6.518755000000  | -4.469414000000 | 4.677131000000  |
| N | 9.540123000000   | 0.354415000000  | 2.088634000000  |
| N | 6.743241000000   | 3.323419000000  | -3.885703000000 |
| N | -2.712183000000  | 8.896431000000  | 0.505472000000  |
| N | 2.157983000000   | -8.809302000000 | -0.990511000000 |
| N | -6.331014000000  | -4.206529000000 | 5.910965000000  |
| N | -10.026518000000 | 1.186703000000  | -2.736014000000 |
| N | -1.560315000000  | 9.418332000000  | 0.330706000000  |
| N | 7.402445000000   | 2.515460000000  | -3.153305000000 |
| N | 9.560891000000   | 0.973296000000  | 3.203642000000  |
| N | 2.348949000000   | -8.814683000000 | -2.251044000000 |
| C | -11.150340000000 | 1.286541000000  | -3.596148000000 |
| C | -11.707196000000 | 0.226881000000  | -4.343138000000 |
| C | -11.735338000000 | 2.561704000000  | -3.696244000000 |
| C | -12.816987000000 | 0.505347000000  | -5.144600000000 |
| H | -11.269714000000 | -0.772707000000 | -4.285271000000 |
| C | -12.848550000000 | 2.721151000000  | -4.533222000000 |
| H | -11.314570000000 | 3.394381000000  | -3.125169000000 |
| H | -13.277915000000 | -0.292182000000 | -5.740957000000 |
| H | -13.328218000000 | 3.702910000000  | -4.632842000000 |
| C | 8.550362000000   | 1.962693000000  | -3.775129000000 |
| C | 8.905314000000   | 2.130019000000  | -5.130123000000 |
| C | 9.358802000000   | 1.150007000000  | -2.959543000000 |
| C | 10.052518000000  | 1.477378000000  | -5.589151000000 |
| H | 8.285214000000   | 2.744594000000  | -5.787229000000 |
| C | 10.489809000000  | 0.551032000000  | -3.531184000000 |
| H | 9.090929000000   | 0.999353000000  | -1.909269000000 |
| H | 10.359479000000  | 1.578521000000  | -6.637815000000 |
| H | 11.142910000000  | -0.087027000000 | -2.922447000000 |
| C | 10.784595000000  | 0.853392000000  | 3.909799000000  |
| C | 10.836135000000  | 1.496819000000  | 5.159622000000  |
| C | 11.925294000000  | 0.153751000000  | 3.462099000000  |
| C | 12.021052000000  | 1.413770000000  | 5.904005000000  |

|   |                  |                  |                 |
|---|------------------|------------------|-----------------|
| H | 9.959621000000   | 2.042046000000   | 5.521634000000  |
| C | 13.050084000000  | 0.140085000000   | 4.290450000000  |
| H | 11.910892000000  | -0.356489000000  | 2.495954000000  |
| H | 12.093484000000  | 1.904313000000   | 6.882740000000  |
| H | 13.956731000000  | -0.392880000000  | 3.977065000000  |
| C | 1.922565000000   | -10.002960000000 | -2.897667000000 |
| C | 1.503566000000   | -11.182385000000 | -2.247579000000 |
| C | 1.926424000000   | -9.969425000000  | -4.303680000000 |
| C | 1.111412000000   | -12.261354000000 | -3.044073000000 |
| H | 1.492540000000   | -11.233206000000 | -1.156019000000 |
| C | 1.503202000000   | -11.112175000000 | -4.996856000000 |
| H | 2.248144000000   | -9.061124000000  | -4.821688000000 |
| H | 0.782624000000   | -13.198308000000 | -2.576997000000 |
| H | 1.487966000000   | -11.118125000000 | -6.093850000000 |
| C | -7.520871000000  | -4.158490000000  | 6.681198000000  |
| C | -8.809243000000  | -4.501551000000  | 6.220019000000  |
| C | -7.372841000000  | -3.732969000000  | 8.013637000000  |
| C | -9.873848000000  | -4.396981000000  | 7.118789000000  |
| H | -8.951205000000  | -4.837270000000  | 5.189851000000  |
| C | -8.515861000000  | -3.662880000000  | 8.821925000000  |
| H | -6.380463000000  | -3.463682000000  | 8.387062000000  |
| H | -10.890635000000 | -4.657317000000  | 6.798373000000  |
| H | -8.434919000000  | -3.331195000000  | 9.864674000000  |
| C | -1.411538000000  | 10.702932000000  | 0.911485000000  |
| C | -0.113483000000  | 11.244448000000  | 0.881147000000  |
| C | -2.446943000000  | 11.460524000000  | 1.498373000000  |
| C | 0.092803000000   | 12.511885000000  | 1.442812000000  |
| H | 0.700978000000   | 10.669946000000  | 0.429893000000  |
| C | -2.122581000000  | 12.714840000000  | 2.021364000000  |
| H | -3.464238000000  | 11.062995000000  | 1.533485000000  |
| H | 1.094050000000   | 12.960684000000  | 1.439033000000  |
| H | -2.901025000000  | 13.335265000000  | 2.483334000000  |
| N | -9.752967000000  | -3.986656000000  | 8.401054000000  |
| N | 1.102356000000   | -12.247955000000 | -4.395636000000 |
| N | -13.394234000000 | 1.723047000000   | -5.252783000000 |
| N | -0.881788000000  | 13.250913000000  | 2.005631000000  |
| N | 10.845779000000  | 0.697629000000   | -4.821175000000 |
| N | 13.119329000000  | 0.752112000000   | 5.493852000000  |
| H | -0.006319000000  | 0.464444000000   | 0.905857000000  |

### Ag<sub>12</sub>-AzopySH

|   |                |                 |                |
|---|----------------|-----------------|----------------|
| C | 2.914943000000 | -0.793954000000 | 4.048627000000 |
| H | 3.581898000000 | 0.062253000000  | 3.844478000000 |
| C | 1.915026000000 | -0.417663000000 | 5.145654000000 |
| H | 1.183954000000 | -1.234939000000 | 5.280882000000 |
| H | 1.355845000000 | 0.485234000000  | 4.842085000000 |
| C | 2.666884000000 | -0.165000000000 | 6.467753000000 |
| H | 3.323344000000 | 0.720923000000  | 6.354308000000 |
| H | 1.936684000000 | 0.079325000000  | 7.260568000000 |
| C | 3.512090000000 | -1.385950000000 | 6.866164000000 |
| H | 4.055808000000 | -1.187829000000 | 7.807827000000 |
| H | 2.838171000000 | -2.244512000000 | 7.055186000000 |
| C | 4.501102000000 | -1.758949000000 | 5.749886000000 |
| H | 5.081932000000 | -2.658526000000 | 6.024456000000 |
| H | 5.231742000000 | -0.936125000000 | 5.613098000000 |
| C | 3.767584000000 | -2.014029000000 | 4.417428000000 |

|    |                 |                 |                 |
|----|-----------------|-----------------|-----------------|
| H  | 4.489807000000  | -2.230339000000 | 3.608479000000  |
| H  | 3.111203000000  | -2.897983000000 | 4.519719000000  |
| C  | -0.089617000000 | 4.968655000000  | 1.551529000000  |
| H  | -0.827984000000 | 5.646612000000  | 1.081808000000  |
| C  | -0.480419000000 | 4.733320000000  | 3.015770000000  |
| H  | 0.204017000000  | 3.983898000000  | 3.453446000000  |
| H  | -1.506777000000 | 4.330937000000  | 3.072079000000  |
| C  | 1.313164000000  | 5.576044000000  | 1.413431000000  |
| H  | 1.549457000000  | 5.754387000000  | 0.347935000000  |
| H  | 2.055075000000  | 4.847010000000  | 1.790999000000  |
| C  | 3.094884000000  | 2.528354000000  | 3.066059000000  |
| C  | 3.688614000000  | 3.363249000000  | 4.236075000000  |
| C  | -0.594366000000 | -3.507873000000 | 4.264652000000  |
| C  | -4.396585000000 | 3.248757000000  | 1.528369000000  |
| C  | -5.782284000000 | 3.778964000000  | 2.001051000000  |
| C  | 1.027046000000  | -6.321520000000 | 1.852386000000  |
| H  | 0.371407000000  | -5.858989000000 | 2.598111000000  |
| C  | 0.704905000000  | -7.539681000000 | 1.247466000000  |
| H  | -0.202897000000 | -8.081694000000 | 1.526043000000  |
| C  | 1.516442000000  | -8.017953000000 | 0.202605000000  |
| C  | 2.697747000000  | -7.315859000000 | -0.113704000000 |
| H  | 3.364403000000  | -7.672599000000 | -0.901948000000 |
| C  | 2.968242000000  | -6.132503000000 | 0.570049000000  |
| H  | 3.853090000000  | -5.534791000000 | 0.340972000000  |
| C  | 4.160265000000  | 4.152027000000  | -2.632639000000 |
| H  | 3.320783000000  | 4.466143000000  | -3.262300000000 |
| C  | 5.439171000000  | 3.940675000000  | -3.159482000000 |
| H  | 5.649256000000  | 4.094420000000  | -4.221729000000 |
| C  | 6.452562000000  | 3.460964000000  | -2.309111000000 |
| C  | 6.159822000000  | 3.291077000000  | -0.939863000000 |
| H  | 6.930318000000  | 2.928709000000  | -0.255991000000 |
| C  | 4.860525000000  | 3.530310000000  | -0.500150000000 |
| H  | 4.576371000000  | 3.354651000000  | 0.542504000000  |
| C  | 6.631094000000  | 0.698101000000  | 1.631583000000  |
| H  | 6.062566000000  | 1.543558000000  | 2.033817000000  |
| C  | 8.024314000000  | 0.689264000000  | 1.602576000000  |
| H  | 8.605539000000  | 1.535133000000  | 1.977309000000  |
| C  | 7.902924000000  | -1.521888000000 | 0.618432000000  |
| H  | 8.387509000000  | -2.412244000000 | 0.208829000000  |
| C  | 6.509756000000  | -1.429896000000 | 0.683765000000  |
| H  | 5.862308000000  | -2.242303000000 | 0.337556000000  |
| C  | 8.681132000000  | -0.440297000000 | 1.066395000000  |
| C  | -0.379695000000 | 6.057498000000  | 3.799457000000  |
| H  | -1.129325000000 | 6.774519000000  | 3.406014000000  |
| H  | -0.641132000000 | 5.875456000000  | 4.857755000000  |
| C  | 1.023955000000  | 6.675093000000  | 3.687738000000  |
| H  | 1.065598000000  | 7.635273000000  | 4.234076000000  |
| H  | 1.757572000000  | 5.999801000000  | 4.168944000000  |
| C  | 1.418362000000  | 6.886421000000  | 2.217153000000  |
| H  | 2.450977000000  | 7.276042000000  | 2.142971000000  |
| H  | 0.758331000000  | 7.648085000000  | 1.755887000000  |
| Ag | 1.020695000000  | 1.220502000000  | 1.337269000000  |
| Ag | -0.387975000000 | -0.892064000000 | 2.566419000000  |
| Ag | -1.771044000000 | 1.734358000000  | 1.553869000000  |
| Ag | 2.025514000000  | -3.391770000000 | 1.608486000000  |
| Ag | 3.670939000000  | -0.049172000000 | 0.689240000000  |
| F  | -6.145942000000 | 4.882506000000  | 1.282362000000  |

|    |                 |                 |                 |
|----|-----------------|-----------------|-----------------|
| F  | -5.816919000000 | 4.108111000000  | 3.310538000000  |
| F  | -6.740495000000 | 2.823431000000  | 1.790475000000  |
| N  | 2.128343000000  | -5.609680000000 | 1.502523000000  |
| N  | 3.858959000000  | 3.920000000000  | -1.333342000000 |
| N  | 5.878744000000  | -0.332496000000 | 1.162924000000  |
| O  | 1.850677000000  | 2.292849000000  | 3.146356000000  |
| O  | -0.831109000000 | -2.294106000000 | 4.515465000000  |
| O  | -3.508249000000 | 3.137176000000  | 2.417940000000  |
| O  | 3.918354000000  | 2.183297000000  | 2.178610000000  |
| O  | -0.902149000000 | -4.200934000000 | 3.248758000000  |
| O  | -4.344884000000 | 2.971992000000  | 0.293018000000  |
| S  | 2.078916000000  | -1.092475000000 | 2.393144000000  |
| S  | -2.762852000000 | -0.524370000000 | 1.945105000000  |
| S  | -0.219651000000 | 3.415304000000  | 0.514765000000  |
| Ag | 1.779602000000  | 3.021317000000  | -0.926512000000 |
| C  | 0.233173000000  | -4.292652000000 | 5.330321000000  |
| C  | -3.096925000000 | 0.475695000000  | 4.561806000000  |
| H  | -3.036970000000 | 1.491272000000  | 4.126739000000  |
| H  | -2.070000000000 | 0.133414000000  | 4.784952000000  |
| C  | -3.744700000000 | -0.467606000000 | 3.540297000000  |
| C  | -3.939798000000 | 0.525071000000  | 5.851141000000  |
| H  | -3.922714000000 | -0.470337000000 | 6.339334000000  |
| H  | -3.476199000000 | 1.234310000000  | 6.560695000000  |
| C  | -6.029699000000 | -0.035071000000 | 4.537347000000  |
| H  | -7.061490000000 | 0.278482000000  | 4.293170000000  |
| H  | -6.104880000000 | -1.049677000000 | 4.977346000000  |
| C  | -5.393452000000 | 0.927127000000  | 5.552350000000  |
| H  | -5.986157000000 | 0.945954000000  | 6.485306000000  |
| H  | -5.410963000000 | 1.954196000000  | 5.137112000000  |
| C  | -5.201447000000 | -0.095315000000 | 3.239386000000  |
| H  | -5.640542000000 | -0.818837000000 | 2.529541000000  |
| H  | -5.226090000000 | 0.893912000000  | 2.748246000000  |
| H  | -3.687297000000 | -1.505242000000 | 3.915758000000  |
| C  | -3.175402000000 | 0.558133000000  | -3.642288000000 |
| H  | -3.914548000000 | -0.247893000000 | -3.481908000000 |
| C  | -2.193632000000 | 0.139223000000  | -4.739677000000 |
| H  | -1.403711000000 | 0.903472000000  | -4.838430000000 |
| H  | -1.711564000000 | -0.813327000000 | -4.463221000000 |
| C  | -2.951864000000 | -0.018500000000 | -6.072638000000 |
| H  | -3.670285000000 | -0.857015000000 | -5.984530000000 |
| H  | -2.234932000000 | -0.295410000000 | -6.866918000000 |
| C  | -3.700862000000 | 1.270925000000  | -6.448408000000 |
| H  | -4.257809000000 | 1.132988000000  | -7.393253000000 |
| H  | -2.963157000000 | 2.078656000000  | -6.622085000000 |
| C  | -4.658650000000 | 1.700516000000  | -5.325228000000 |
| H  | -5.160714000000 | 2.652588000000  | -5.578517000000 |
| H  | -5.457802000000 | 0.941008000000  | -5.205688000000 |
| C  | -3.908515000000 | 1.859716000000  | -3.987794000000 |
| H  | -4.609942000000 | 2.134811000000  | -3.180108000000 |
| H  | -3.168522000000 | 2.677984000000  | -4.074778000000 |
| C  | -0.124265000000 | -4.861835000000 | -1.257323000000 |
| H  | 0.645518000000  | -5.506821000000 | -0.797888000000 |
| C  | 0.214234000000  | -4.662483000000 | -2.738752000000 |
| H  | -0.497518000000 | -3.940227000000 | -3.178006000000 |
| H  | 1.231510000000  | -4.248284000000 | -2.840397000000 |
| C  | -1.509035000000 | -5.489526000000 | -1.048022000000 |
| H  | -1.686025000000 | -5.665387000000 | 0.029880000000  |

|    |                 |                 |                 |
|----|-----------------|-----------------|-----------------|
| H  | -2.279190000000 | -4.772566000000 | -1.385817000000 |
| C  | -3.586903000000 | -2.897469000000 | -2.766650000000 |
| C  | -4.688654000000 | -3.480129000000 | -3.698048000000 |
| C  | 0.464684000000  | 3.186637000000  | -3.908538000000 |
| C  | 4.075158000000  | -3.472418000000 | -1.458476000000 |
| C  | 5.314283000000  | -4.222964000000 | -2.038733000000 |
| C  | -1.280215000000 | 6.009668000000  | -1.686425000000 |
| H  | -0.547297000000 | 5.494290000000  | -2.317393000000 |
| C  | -1.035411000000 | 7.289366000000  | -1.191680000000 |
| H  | -0.110695000000 | 7.818493000000  | -1.433217000000 |
| C  | -1.992219000000 | 7.883144000000  | -0.340465000000 |
| C  | -3.186730000000 | 7.186500000000  | -0.081431000000 |
| H  | -3.954206000000 | 7.633209000000  | 0.556541000000  |
| C  | -3.342984000000 | 5.900090000000  | -0.604435000000 |
| H  | -4.228342000000 | 5.299135000000  | -0.379547000000 |
| C  | -4.160492000000 | -4.067724000000 | 3.202758000000  |
| H  | -3.251711000000 | -4.302068000000 | 3.766330000000  |
| C  | -5.402975000000 | -3.960156000000 | 3.824946000000  |
| H  | -5.513917000000 | -4.102523000000 | 4.902371000000  |
| C  | -6.523908000000 | -3.630419000000 | 3.033393000000  |
| C  | -6.351654000000 | -3.495960000000 | 1.644045000000  |
| H  | -7.211147000000 | -3.266661000000 | 1.007416000000  |
| C  | -5.064501000000 | -3.599579000000 | 1.107378000000  |
| H  | -4.871263000000 | -3.446208000000 | 0.040216000000  |
| C  | -6.488621000000 | -0.843516000000 | -1.899063000000 |
| H  | -6.024500000000 | -1.818432000000 | -1.730192000000 |
| C  | -7.469829000000 | -0.661398000000 | -2.876393000000 |
| H  | -7.806441000000 | -1.498519000000 | -3.493257000000 |
| C  | -7.524268000000 | 1.683323000000  | -2.275999000000 |
| H  | -7.917409000000 | 2.693321000000  | -2.412203000000 |
| C  | -6.538312000000 | 1.417936000000  | -1.328851000000 |
| H  | -6.109482000000 | 2.207126000000  | -0.703054000000 |
| C  | -7.993086000000 | 0.626664000000  | -3.085737000000 |
| C  | 0.103790000000  | -6.008935000000 | -3.481998000000 |
| H  | 0.863113000000  | -6.715710000000 | -3.087589000000 |
| H  | 0.338555000000  | -5.852366000000 | -4.550762000000 |
| C  | -1.296287000000 | -6.622800000000 | -3.320580000000 |
| H  | -1.352906000000 | -7.595121000000 | -3.844465000000 |
| H  | -2.044465000000 | -5.955647000000 | -3.791194000000 |
| C  | -1.643700000000 | -6.808273000000 | -1.834768000000 |
| H  | -2.673626000000 | -7.194335000000 | -1.719510000000 |
| H  | -0.970802000000 | -7.568697000000 | -1.393670000000 |
| Ag | -1.402141000000 | -1.571523000000 | -1.394512000000 |
| Ag | 0.207960000000  | 0.771757000000  | -1.890538000000 |
| Ag | 1.658756000000  | -1.665601000000 | -1.242279000000 |
| Ag | -2.199976000000 | 3.055800000000  | -1.227814000000 |
| Ag | -4.043670000000 | -0.037688000000 | -0.104840000000 |
| F  | 5.436695000000  | -5.464693000000 | -1.479001000000 |
| F  | 5.266078000000  | -4.384086000000 | -3.379933000000 |
| F  | 6.463107000000  | -3.534979000000 | -1.752174000000 |
| N  | -2.401393000000 | 5.304311000000  | -1.375413000000 |
| N  | -3.977204000000 | -3.857592000000 | 1.873950000000  |
| N  | -6.013865000000 | 0.175542000000  | -1.143630000000 |
| O  | -2.460192000000 | -2.731611000000 | -3.307806000000 |
| O  | 0.446306000000  | 1.922847000000  | -3.936189000000 |
| O  | 3.200035000000  | -3.135579000000 | -2.305376000000 |
| O  | -3.939652000000 | -2.611046000000 | -1.583538000000 |

|    |                  |                 |                 |
|----|------------------|-----------------|-----------------|
| O  | 0.914616000000   | 3.979112000000  | -3.030825000000 |
| O  | 4.107405000000   | -3.281934000000 | -0.208871000000 |
| S  | -2.360950000000  | 0.716244000000  | -1.958393000000 |
| S  | 2.779316000000   | 0.568933000000  | -1.545181000000 |
| S  | 0.013075000000   | -3.271371000000 | -0.266833000000 |
| Ag | -1.920672000000  | -3.025053000000 | 1.275308000000  |
| F  | -5.196477000000  | -2.481915000000 | -4.490805000000 |
| F  | -5.737948000000  | -3.997926000000 | -2.997489000000 |
| F  | -4.215459000000  | -4.452451000000 | -4.510314000000 |
| C  | -0.231851000000  | 3.895880000000  | -5.110912000000 |
| F  | 0.483218000000   | 4.956846000000  | -5.557680000000 |
| F  | -1.455295000000  | 4.370486000000  | -4.698011000000 |
| F  | -0.457186000000  | 3.070322000000  | -6.160778000000 |
| C  | 3.302425000000   | -0.288650000000 | -4.177016000000 |
| H  | 3.077509000000   | -1.316569000000 | -3.836715000000 |
| H  | 2.351224000000   | 0.188147000000  | -4.473396000000 |
| C  | 3.931355000000   | 0.491573000000  | -3.015868000000 |
| C  | 4.283284000000   | -0.352067000000 | -5.364747000000 |
| H  | 4.443428000000   | 0.668981000000  | -5.767927000000 |
| H  | 3.830952000000   | -0.946232000000 | -6.179347000000 |
| C  | 6.253846000000   | -0.155830000000 | -3.784158000000 |
| H  | 7.206629000000   | -0.611899000000 | -3.456195000000 |
| H  | 6.496300000000   | 0.871305000000  | -4.125231000000 |
| C  | 5.635227000000   | -0.952637000000 | -4.943947000000 |
| H  | 6.329612000000   | -0.976413000000 | -5.803793000000 |
| H  | 5.484049000000   | -2.001602000000 | -4.622719000000 |
| C  | 5.289152000000   | -0.080505000000 | -2.585355000000 |
| H  | 5.720884000000   | 0.532998000000  | -1.774492000000 |
| H  | 5.136691000000   | -1.094736000000 | -2.175152000000 |
| H  | 4.054207000000   | 1.550155000000  | -3.310373000000 |
| F  | 1.446454000000   | -4.659163000000 | 4.794702000000  |
| F  | 0.494310000000   | -3.569962000000 | 6.445469000000  |
| F  | -0.398531000000  | -5.433870000000 | 5.707209000000  |
| F  | 4.236374000000   | 4.516800000000  | 3.758145000000  |
| F  | 2.770825000000   | 3.702998000000  | 5.171762000000  |
| F  | 4.676315000000   | 2.658447000000  | 4.860286000000  |
| N  | -8.958771000000  | 0.748755000000  | -4.119139000000 |
| N  | -7.831851000000  | -3.413265000000 | 3.535925000000  |
| N  | 10.085330000000  | -0.591680000000 | 0.934908000000  |
| N  | 7.686373000000   | 3.122823000000  | -2.926156000000 |
| N  | -1.839911000000  | 9.142568000000  | 0.287691000000  |
| N  | 1.055072000000   | -9.165811000000 | -0.488257000000 |
| N  | -7.848945000000  | -3.162777000000 | 4.785129000000  |
| N  | -9.328812000000  | 1.950547000000  | -4.326215000000 |
| N  | -0.619514000000  | 9.494443000000  | 0.403713000000  |
| N  | 8.544726000000   | 2.656272000000  | -2.107607000000 |
| N  | 10.745393000000  | 0.453212000000  | 1.243862000000  |
| N  | 1.483448000000   | -9.219693000000 | -1.687661000000 |
| C  | -10.290522000000 | 2.085590000000  | -5.360451000000 |
| C  | -10.809619000000 | 1.030063000000  | -6.139832000000 |
| C  | -10.743427000000 | 3.393424000000  | -5.611050000000 |
| C  | -11.751733000000 | 1.345118000000  | -7.122012000000 |
| H  | -10.472162000000 | 0.005232000000  | -5.967309000000 |
| C  | -11.693443000000 | 3.588207000000  | -6.623265000000 |
| H  | -10.349700000000 | 4.223347000000  | -5.017124000000 |
| H  | -12.177899000000 | 0.551681000000  | -7.748951000000 |
| H  | -12.067391000000 | 4.596128000000  | -6.842773000000 |

|   |                  |                  |                 |
|---|------------------|------------------|-----------------|
| C | 9.753087000000   | 2.232367000000   | -2.712061000000 |
| C | 9.947788000000   | 2.042083000000   | -4.096490000000 |
| C | 10.814960000000  | 1.947411000000   | -1.834613000000 |
| C | 11.196924000000  | 1.581751000000   | -4.521422000000 |
| H | 9.134164000000   | 2.242013000000   | -4.798025000000 |
| C | 12.028739000000  | 1.505118000000   | -2.378585000000 |
| H | 10.672542000000  | 2.071351000000   | -0.757220000000 |
| H | 11.385139000000  | 1.411852000000   | -5.589137000000 |
| H | 12.879107000000  | 1.282747000000   | -1.721984000000 |
| C | 12.148973000000  | 0.314909000000   | 1.076863000000  |
| C | 12.925190000000  | 1.429203000000   | 1.443896000000  |
| C | 12.799538000000  | -0.814641000000  | 0.537211000000  |
| C | 14.313204000000  | 1.366155000000   | 1.255638000000  |
| H | 12.436399000000  | 2.315353000000   | 1.859517000000  |
| C | 14.188614000000  | -0.762016000000  | 0.393768000000  |
| H | 12.217316000000  | -1.687590000000  | 0.232869000000  |
| H | 14.946834000000  | 2.218916000000   | 1.529536000000  |
| H | 14.729996000000  | -1.617454000000  | -0.029132000000 |
| C | 1.026613000000   | -10.347803000000 | -2.416613000000 |
| C | 0.328815000000   | -11.445665000000 | -1.871827000000 |
| C | 1.306489000000   | -10.339932000000 | -3.794785000000 |
| C | -0.049466000000  | -12.473270000000 | -2.739752000000 |
| H | 0.100237000000   | -11.475010000000 | -0.803590000000 |
| C | 0.869208000000   | -11.424496000000 | -4.568075000000 |
| H | 1.846393000000   | -9.494536000000  | -4.231415000000 |
| H | -0.590315000000  | -13.346864000000 | -2.354359000000 |
| H | 1.065512000000   | -11.447461000000 | -5.647267000000 |
| C | -9.146475000000  | -2.944377000000  | 5.315918000000  |
| C | -10.357501000000 | -3.105142000000  | 4.610736000000  |
| C | -9.197370000000  | -2.537080000000  | 6.661001000000  |
| C | -11.549133000000 | -2.847559000000  | 5.293283000000  |
| H | -10.345299000000 | -3.422447000000  | 3.565149000000  |
| C | -10.452813000000 | -2.303391000000  | 7.239292000000  |
| H | -8.266734000000  | -2.407994000000  | 7.221329000000  |
| H | -12.512183000000 | -2.963622000000  | 4.780196000000  |
| H | -10.527377000000 | -1.981361000000  | 8.285503000000  |
| C | -0.435993000000  | 10.762269000000  | 1.012589000000  |
| C | 0.893111000000   | 11.113528000000  | 1.310222000000  |
| C | -1.464436000000  | 11.675122000000  | 1.326756000000  |
| C | 1.134118000000   | 12.355360000000  | 1.914013000000  |
| H | 1.702357000000   | 10.416512000000  | 1.072831000000  |
| C | -1.102616000000  | 12.886301000000  | 1.922103000000  |
| H | -2.504935000000  | 11.426418000000  | 1.103846000000  |
| H | 2.158828000000   | 12.658165000000  | 2.163325000000  |
| H | -1.873319000000  | 13.624121000000  | 2.178730000000  |
| N | -11.619175000000 | -2.452294000000  | 6.584034000000  |
| N | 0.204664000000   | -12.482697000000 | -4.067277000000 |
| N | -12.200691000000 | 2.594664000000   | -7.376562000000 |
| N | 0.167278000000   | 13.240750000000  | 2.220086000000  |
| N | 12.233359000000  | 1.314320000000   | -3.696034000000 |
| N | 14.951498000000  | 0.300021000000   | 0.737484000000  |
| H | 0.237735000000   | 0.439660000000   | -0.046599000000 |
